# Supplementary material for: Photoinduced radical cyclization reaction of isocyanides with α-carbonyl bromides to access 11-alkyl-substituted 1,4-dibenzodiazepines
Source: Royal Society of Chemistry journal article supplement (doi:10.1039/d4ob01985g), 2025-01-01

# Supporting Information

## **Photo-induced radical cyclization reaction of isocyanides with $\alpha$ -carbonyl bromides to access 11-alkyl-substituted 1,4-dibenzodiazepines**

Ao-Yun Li, Rong Xie, Quan Zhou, Peng-Fei Huang\* and Yu Liu\*

Department of Chemistry and Chemical Engineering, Hunan Institute of Science and Technology, Yueyang 414006, China.

Email: pengfeihuang@whu.edu.cn and lyxtmj\_613@163.com

### **List of Contents**

|                                                            |         |
|------------------------------------------------------------|---------|
| 1. General Information.....                                | S2      |
| 2. Experiment Section.....                                 | S2-S16  |
| 2.1 General Procedure for the Synthesis of Substrates..... | S2      |
| 2.2 Typical Experimental Procedure.....                    | S2-S3   |
| 2.3 Additional Experimental Details.....                   | S3      |
| 2.4 The Light On/Off Experiments.....                      | S3-S4   |
| 2.5 Stern-Volmer Quenching Experiments.....                | S4-S5   |
| 2.6 Quantum Yield Determination.....                       | S5-S8   |
| 2.7 Control Experiments.....                               | S8-S16  |
| 3. Reference.....                                          | S17     |
| 4. Spectra.....                                            | S18-S57 |

## 1. General Information

Unless otherwise stated, all commercial reagents were used as received. Aniline (Adamas-beta, 99%), 1-fluoro-2-nitrobenzene (Leyan, 99%), triethylamine (Aladdin, 99%), acetonitrile (Aladdin, 99%), formic acid (Aladdin, 99%) and phosphorus oxychloride (Adamas-beta, 99%) were used without further treatment. All reagents and solvents were commercially available and used without any further purification unless specified. Flash column chromatography was performed using silica gel (0.25mm, 300-400 mesh). Analytical thin-layer chromatography was performed using glass plates pre-coated with 0.25mm 300-400 mesh silica gel impregnated with a fluorescent indicator (254 nm). All reactions were carried out with magnetic stirring and in dried glassware. Nuclear magnetic resonance (NMR) spectra are recorded in parts per million from internal tetramethylsilane on the  $\delta$  scale.  $^1\text{H}$  NMR,  $^{19}\text{F}$  NMR and  $^{13}\text{C}$  NMR spectra were recorded in  $\text{CDCl}_3$  on a Bruker DRX-400 spectrometer operating at 400 MHz, 282 MHz, and 100 MHz, respectively. All chemical shift values are quoted in ppm and coupling constants are quoted in Hz. The solvent peak was used as a reference value, for  $^1\text{H}$  NMR: TMS = 0.00 ppm, for  $^{13}\text{C}$  NMR:  $\text{CDCl}_3$  = 77.00 ppm. The following abbreviations were used to explain multiplicities: s = singlet, d = doublet, dd = doublet of doublet, t = triplet, td = triplet of doublet, q = quartet, m = multiplet, and br = broad. High-resolution mass spectra (HRMS) were obtained on an Agilent mass spectrometer using ESI-TOF (electrospray ionization-time of flight).

## 2. Experiment Section

### 2.1 General Procedure for the Synthesis of Substrates 1

2-Isocyano-*N*-methyl-*N*-phenylaniline **1**<sup>[1-2]</sup> was synthesized according to the known methods.

### 2.2 Typical Experimental Procedure

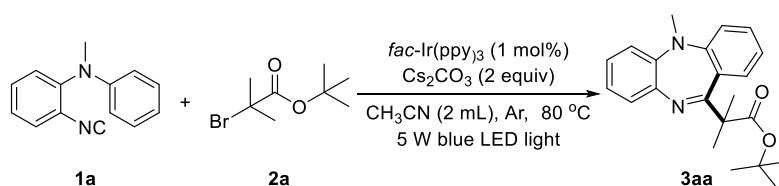

To a schlenk tube were added 2-isocyano-*N*-methyl-*N*-phenylaniline **1a** (0.2 mmol, 41.6 mg), *tert*-butyl 2-bromo-2-methylpropanoate **2a** (2.0 equiv, 0.4 mmol, 88.8 mg), Cs<sub>2</sub>CO<sub>3</sub> (2.0 equiv, 0.4 mmol, 130 mg), *fac*-Ir(ppy)<sub>3</sub> (1 mol%, 0.6 mg), MeCN (2 mL). Then the tube was stirred at 80 °C in an argon atmosphere for the indicated time until complete consumption of the starting material as monitored by TLC analysis. The residue was purified by silica gel flash column chromatography (petroleum ether/ethyl acetate = 90 : 1) to afford the desired products **3aa**.

### 2.3 Additional Experimental Details

The light source bought from YICAI ([https://item.taobao.com/item.htm?\\_u=u10503hgcbel&id=597700668537&spm=a1z09.2.0.0.1f8a2e8dVdeg2&skuId=4812351826113](https://item.taobao.com/item.htm?_u=u10503hgcbel&id=597700668537&spm=a1z09.2.0.0.1f8a2e8dVdeg2&skuId=4812351826113)), 5 W blue LED light bulb (E27). The wavelength was about 400-500 nm and the wavelength of peak intensity was about 415.0 nm. The pictures of the visible-light source (**Figure S1**) was shown as follow:

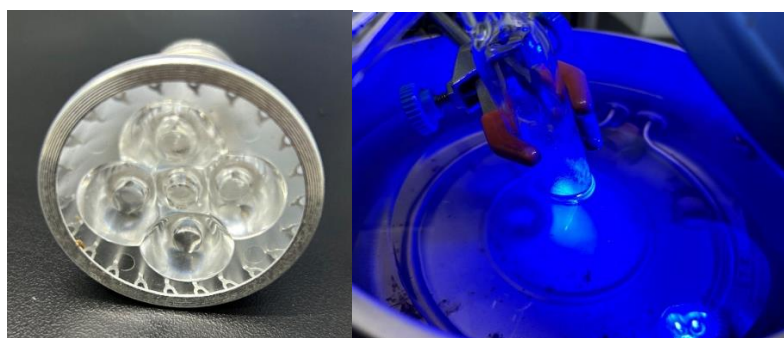

**Figure S1.** The light source and photographs of the experimental setup.

### 2.4 The Light On/Off Experiments

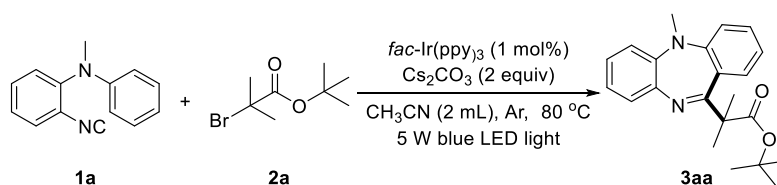

|                |   |        |          |         |          |         |          |         |
|----------------|---|--------|----------|---------|----------|---------|----------|---------|
| <b>Time/h</b>  | 0 | 6 (on) | 12 (off) | 18 (on) | 24 (off) | 30 (on) | 36 (off) | 42 (on) |
| <b>Yield/%</b> | 0 | 20     | 20       | 40      | 40       | 62      | 62       | 83      |

The above-depicted reaction was performed according to the general protocol established. The reaction was irradiated with 5 W blue LEDs for 6 hours and then stirred

in the dark for 6 hours. This procedure was repeated for 42 hours, and the yield of the product was determined by  $^1\text{H}$  NMR with dibromomethane as an internal standard at each point the light was turned off or on. The results are shown in the graph above. This result shows that constant light irradiation is needed to progress the reaction.

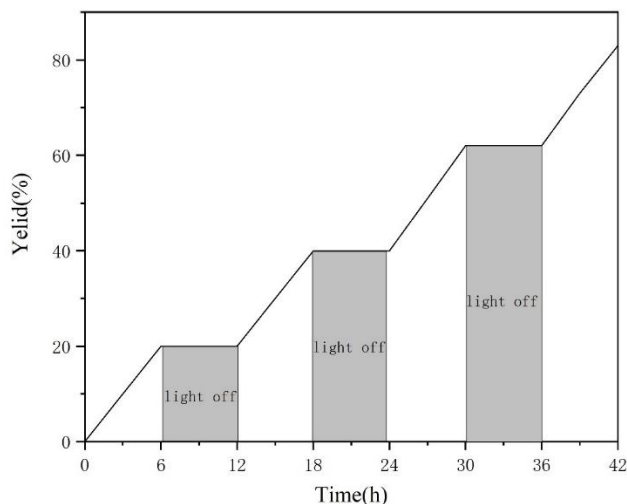

**Figure S2 The light on/off Experiments**

## 2.5 Stern-Volmer Quenching Experiments

### Formulation solution:

2-isocyano-*N*-methyl-*N*-phenylaniline **1a** (8.2 mg) was dissolved in MeCN in a 4 mL volumetric flask to set the concentration to be 0.01 M. *tert*-butyl 2-bromo-2-methylpropanoate **2a** (8.8 mg) was dissolved in MeCN in a 4mL volumetric flask to set the concentration to be 0.01 M.

### Additional experimental details:

The samples were prepared by the copper-based photocatalyst *fac*-Ir(ppy)<sub>3</sub> ( $5 \times 10^{-4}$  M) with different amounts of quencher **1a** in MeCN in a light path quartz fluorescence cuvette. The concentration of quencher **1a** is 0.01 M in MeCN. For each **S3** quenching experiment, 3  $\mu\text{L}$  of quencher solution was separately titrated to the copper based photocatalyst *fac*-Ir(ppy)<sub>3</sub> (3.0 mL).

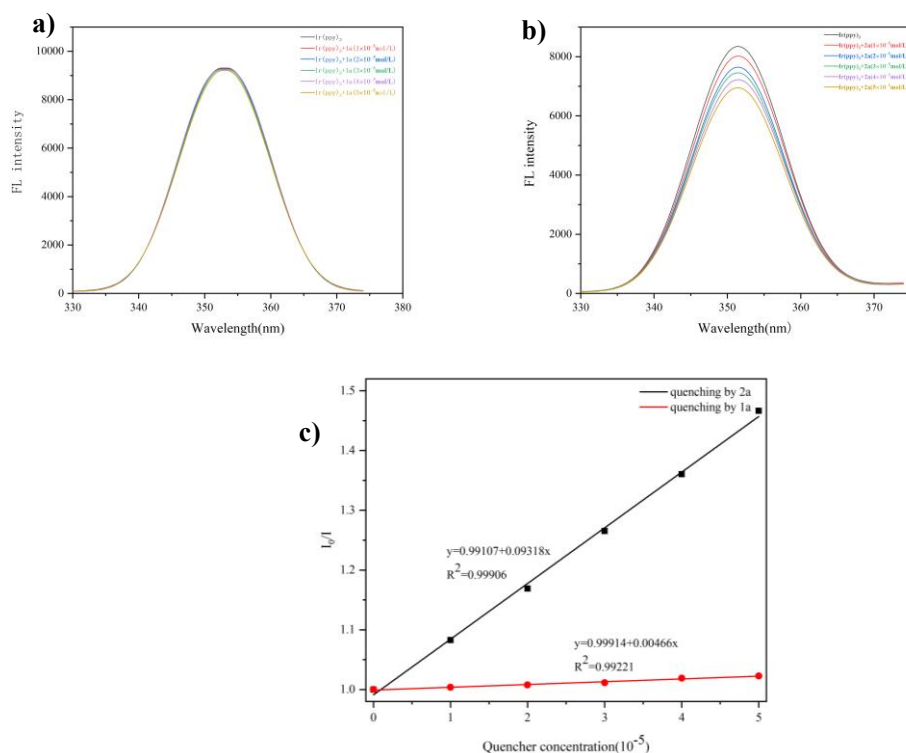

**Figure S3 Stern-Volmer Quenching Experiments: (a) *fac*-Ir(ppy)<sub>3</sub> quenched by 1a in MeCN; (b) *fac*-Ir(ppy)<sub>3</sub> quenched by 2a in MeCN; (c) Stern-Volmer plot of photocatalyst at different concentration.**

The resulting mixture was sparged with nitrogen for 3 minutes and then irradiated at 450 nm. Fluorescence emission spectra were recorded (3 trials per sample). Into this solution, 3.0  $\mu\text{L}$  of a 2-isocyano-*N*-methyl-*N*-phenylaniline **1a** solution was successively added and uniformly stirred, and the resulting mixture was bubbled with nitrogen for 3 minutes and irradiated at 450 nm. Fluorescence emission spectra of 0  $\mu\text{L}$ , 3.0  $\mu\text{L}$ , 6.0  $\mu\text{L}$ , 9.0  $\mu\text{L}$ , 12.0  $\mu\text{L}$ , 15.0  $\mu\text{L}$  fluorescence intensity. Follow this method and make changes to the amount to obtain the Stern-Volmer relationship in turn.

Compared the figure **S3 (a)** of Stern-Volmer quenching experiments results, the emission intensity of the copperbased photocatalyst *fac*-Ir(ppy)<sub>3</sub> solution was strongly affected by the gradual increase of the amount of **2a**, and the influence is not observed to **1a**. These indicated that the single electron transfer (SET) process occurred in photocatalyst and sulfonium salt.

## 2.7 Quantum Yield Determination

### Determination of the light intensity at 415 nm:

According to the procedure of Yoon<sup>2</sup> the photon flux of the blue LED ( $\lambda_{\max} = 415$  nm) was determined by standard ferrioxalate actinometry. A 0.15 M solution of ferrioxalate was prepared by dissolving 2.21 g of potassium ferrioxalate hydrate in 30 mL of 0.05 M H<sub>2</sub>SO<sub>4</sub>. A buffered solution of phenanthroline was prepared by dissolving 50 mg of phenanthroline and 11.25 g of sodium acetate in 50 mL of 0.5 M H<sub>2</sub>SO<sub>4</sub>. Both solutions were stored in the dark. To determine the photon flux of the spectrophotometer, 3.0 mL of the ferrioxalate solution was placed in a cuvette and irradiated for 90.0 seconds at  $\lambda = 415$  nm with an emission slit width at 10.0 nm. After irradiation, 0.53 mL of the phenanthroline solution was added to the cuvette. The solution was then allowed to rest for 1 h to allow the ferrous ions to completely coordinate to the phenanthroline. The absorbance of the solution was measured at 510 nm. A nonirradiated sample was also prepared and the absorbance at 510 nm measured. Conversion was calculated using eq. 1.

$$\begin{aligned} \text{mol of Fe}^{2+} &= \frac{V \cdot \Delta A_{510\text{nm}}}{l \cdot \varepsilon} \quad (1) \\ \text{mol of Fe}^{2+} &= \frac{(0.00353\text{L}) \cdot (3.162 - 0.399)}{(1.00\text{cm}) \cdot (11100 \frac{\text{L}}{\text{mol}} \text{cm}^{-1})} = 8.80 \times 10^{-7} \end{aligned}$$

Where V is the total volume (0.00353 L) of the solution after addition of phenanthroline,  $\Delta A$  is the difference in absorbance at 510 nm between the irradiated and non-irradiated solutions, l is the path length (1.00 cm), and  $\varepsilon$  is the molar absorptivity of the ferrioxalate actinometer at 510 nm (11,100 L mol<sup>-1</sup> cm<sup>-1</sup>).<sup>3</sup> The photon flux can be calculated using eq. 2.

$$\begin{aligned} \text{Photo flux} &= \frac{\text{mol of Fe}^{2+}}{\phi \cdot t \cdot f} \quad (2) \\ \text{Photo flux} &= \frac{8.80 \times 10^{-7}}{(1.12) \cdot (90\text{s}) \cdot (0.994)} = 8.8 \times 10^{-9} \text{ einstein/s} \end{aligned}$$

Where  $\Phi$  is the quantum yield for the ferrioxalate actinometer (1.12 at  $\lambda = 415$  nm), t is the time (90.0 s), and f is the fraction of light absorbed at 415 nm by the ferrioxalate

actinometer. This value is calculated using eq 3 where  $A_{415\text{ nm}}$  is the absorbance of the ferrioxalate solution at 415 nm. An absorption spectrum gave an  $A_{415\text{ nm}}$  value of  $> 3$ , indicating that the fraction of absorbed light ( $f$ ) is  $> 0.999$ .

$$f = 1 - 10^{-A_{415\text{ nm}}} \quad (3)$$

The photon flux was thus calculated to be  $8.8 \times 10^{-9}$  einsteins  $\text{s}^{-1}$

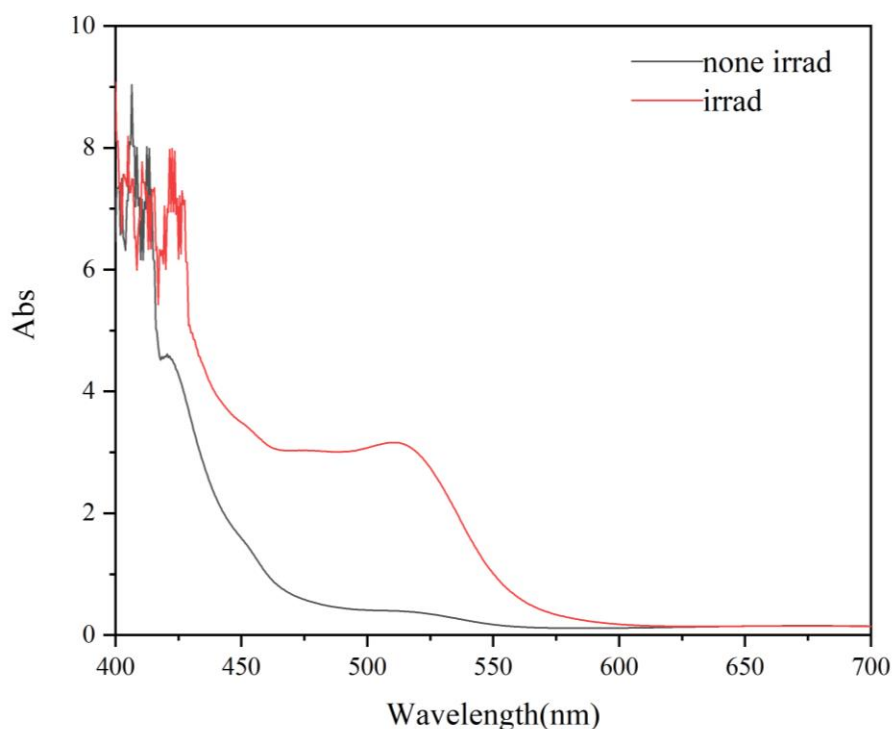

**Figure S6 Absorbance of the sulfuric acid solution.**

**Determination of the reaction quantum yield:**

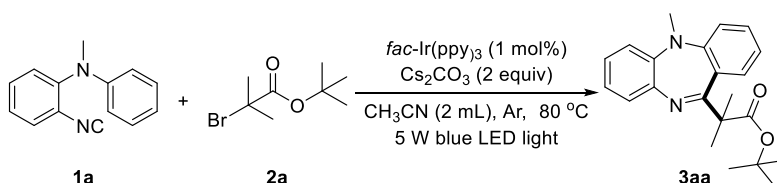

A cuvette was charged with 2-isocyano-*N*-methyl-*N*-phenylaniline **1a** (0.2 mmol, 441.6mg), *tert*-butyl 2-bromo-2-methylpropanoate **2a** (2 equiv., 0.4 mmol, 88.8 mg),  $\text{Cs}_2\text{CO}_3$  (2 equiv., 0.4 mmol, 130 mg), *fac*- $\text{Ir}(\text{ppy})_3$  (1 mol%, 0.6 mg), MeCN (2 mL). The reaction mixture was stirred at room temperature for 2 h (7200 s) under blue LED irradiation ( $\lambda = 415\text{ nm}$ ). The solvent was removed in vacuo and the yield of formed product was determined by  $^1\text{H}$  NMR based on dibromomethane as internal standard. The quantum yield was determined using eq. 4.

$$\phi = \frac{\text{mol of product}}{\text{flux} \cdot t \cdot f} \quad (4)$$

$$\phi = \frac{5.4 \times 10^{-5}}{(8.8 \times 10^{-9} \text{ einstein/s}) \cdot (3600 \text{ s}) \cdot (0.994)} = 0.17 < 1$$

The photon flux is  $8.8 \times 10^{-9}$  einsteins  $\text{s}^{-1}$ ,  $t$  is the reaction time (7200 s).  $f$  is the fraction of incident light absorbed by the catalyst, determined using eq 3. An absorption spectrum of the catalyst (0.001 M) gave an absorbance value of 0.658 at 415 nm (figure S7), indicating that the fraction of light absorbed by the photocatalyst ( $f$ ) is 0.994.

#### Absorbance of catalyst:

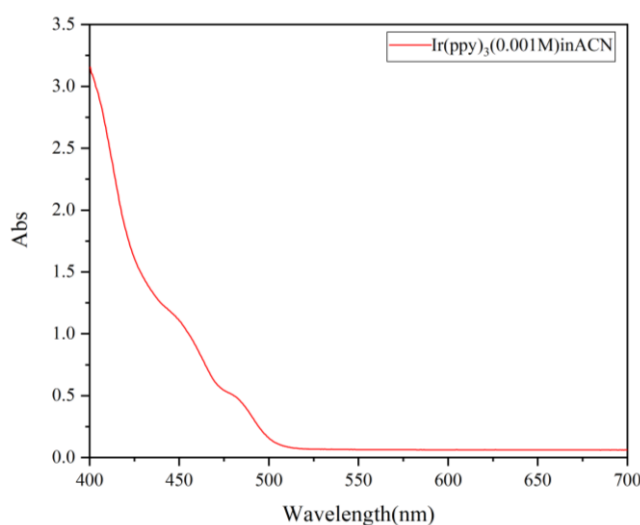

Figure S7 Absorption spectrum of *fac*-Ir(ppy)<sub>3</sub> [0.001 M] in MeCN

## 2.8 Control Experiments

### GC-MS Analysis of Raw Reaction Mixture by Using BHT as Radical Inhibitor (1, 2)

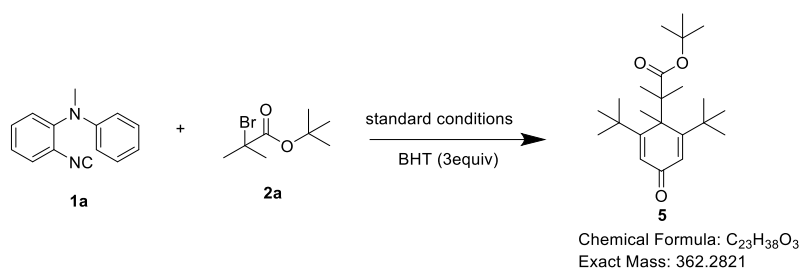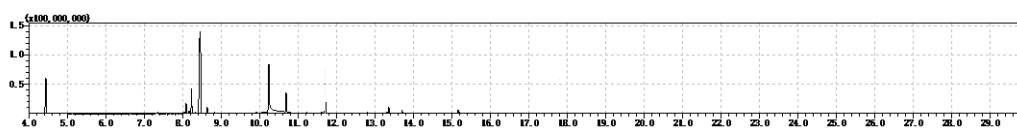



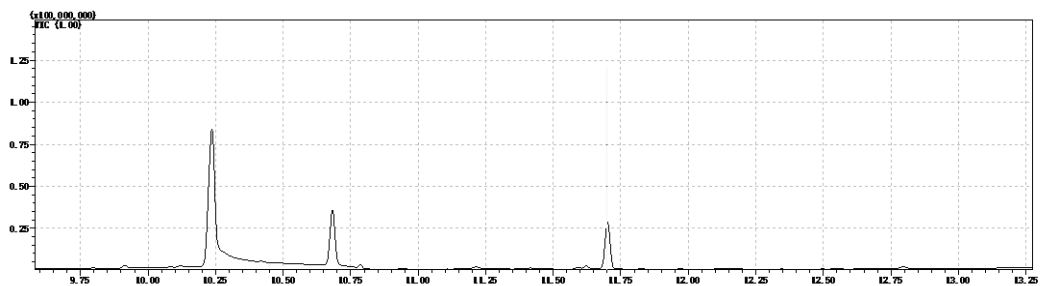

MS spectra of the peak at 11.701 min

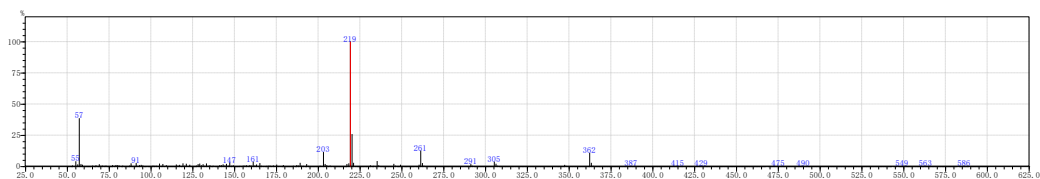

[MS Spectrum]

# of Peaks 546

Raw Spectrum 11.705 (scan : 1542)

Background No Background Spectrum

Base Peak m/z 219.15 (Inten : 7,995,683)

Event# 1

| m/z          | Absolute Intensity | Relative Intensity |      |            |             |
|--------------|--------------------|--------------------|------|------------|-------------|
| 50.007617    | 0.10               | 72.0523450         | 0.29 | 94.1088543 | 1.11        |
| 51.0517812   | 0.22               | 73.0542395         | 0.53 | 95.1050007 | 0.63        |
| 52.056513    | 0.08               | 74.053961          | 0.05 | 96.106708  | 0.08        |
| 53.0550049   | 0.63               | 75.054757          | 0.06 | 97.1012660 | 0.16        |
| 54.1512429   | 0.16               | 76.055669          | 0.07 | 98.153014  | 0.04        |
| 55.05322728  | 4.04               | 77.0575317         | 0.94 | 99.152494  | 0.03        |
| 56.15124943  | 1.56               | 78.1021148         | 0.26 | 100.15     | 4088 0.05   |
| 57.103082111 | 38.55              | 79.0581221         | 1.02 | 101.15     | 37089 0.46  |
| 58.10144641  | 1.81               | 80.1075382         | 0.94 | 102.10     | 28558 0.36  |
| 59.0599751   | 1.25               | 81.0543511         | 0.54 | 103.10     | 31902 0.40  |
| 60.056699    | 0.08               | 82.156120          | 0.08 | 104.15     | 14577 0.18  |
| 61.001636    | 0.02               | 83.1038550         | 0.48 | 105.10     | 171983 2.15 |
| 62.101420    | 0.02               | 84.054912          | 0.06 | 106.15     | 23701 0.30  |
| 63.057159    | 0.09               | 85.107892          | 0.10 | 107.10     | 151548 1.90 |
| 64.0512450   | 0.16               | 86.159858          | 0.12 | 108.15     | 16573 0.21  |
| 65.0540356   | 0.50               | 87.1537228         | 0.47 | 109.15     | 65453 0.82  |
| 66.1010089   | 0.13               | 88.10188561        | 2.36 | 110.05     | 5786 0.07   |
| 67.0560305   | 0.75               | 89.0515122         | 0.19 | 111.10     | 4564 0.06   |
| 68.157268    | 0.09               | 90.158117          | 0.10 | 112.15     | 1856 0.02   |
| 69.05128531  | 1.61               | 91.10206697        | 2.59 | 113.15     | 2018 0.03   |
| 70.0536585   | 0.46               | 92.1024401         | 0.31 | 114.15     | 4815 0.06   |
| 71.0538354   | 0.48               | 93.1064649         | 0.81 | 115.10     | 115442 1.44 |

|        |        |      |        |        |       |        |         |        |
|--------|--------|------|--------|--------|-------|--------|---------|--------|
| 116.10 | 42196  | 0.53 | 160.15 | 37058  | 0.46  | 204.10 | 151316  | 1.89   |
| 117.10 | 91676  | 1.15 | 161.10 | 292265 | 3.66  | 205.10 | 69452   | 0.87   |
| 118.15 | 18513  | 0.23 | 162.10 | 49836  | 0.62  | 206.10 | 13452   | 0.17   |
| 119.10 | 185663 | 2.32 | 163.10 | 114874 | 1.44  | 207.05 | 39105   | 0.49   |
| 120.15 | 30587  | 0.38 | 164.15 | 17636  | 0.22  | 208.05 | 15450   | 0.19   |
| 121.10 | 164722 | 2.06 | 165.10 | 202775 | 2.54  | 209.05 | 5590    | 0.07   |
| 122.15 | 19349  | 0.24 | 166.05 | 28876  | 0.36  | 210.05 | 1498    | 0.02   |
| 123.15 | 101284 | 1.27 | 167.10 | 14650  | 0.18  | 211.00 | 1727    | 0.02   |
| 124.05 | 8974   | 0.11 | 168.10 | 8719   | 0.11  | 212.15 | 1112    | 0.01   |
| 125.15 | 1859   | 0.02 | 169.10 | 22860  | 0.29  | 213.10 | 3378    | 0.04   |
| 126.15 | 2672   | 0.03 | 170.10 | 29550  | 0.37  | 214.15 | 1423    | 0.02   |
| 127.15 | 37841  | 0.47 | 171.10 | 41334  | 0.52  | 215.10 | 11446   | 0.14   |
| 128.10 | 140361 | 1.76 | 172.10 | 15137  | 0.19  | 216.15 | 3535    | 0.04   |
| 129.10 | 169294 | 2.12 | 173.10 | 52534  | 0.66  | 217.10 | 147063  | 1.84   |
| 130.15 | 56428  | 0.71 | 174.10 | 19767  | 0.25  | 218.25 | 184810  | 2.31   |
| 131.15 | 130950 | 1.64 | 175.10 | 104455 | 1.31  | 219.15 | 7995683 | 100.00 |
| 132.15 | 29918  | 0.37 | 176.10 | 18263  | 0.23  | 220.15 | 2066319 | 25.84  |
| 133.15 | 182858 | 2.29 | 177.10 | 15911  | 0.20  | 221.10 | 221756  | 2.77   |
| 134.15 | 35968  | 0.45 | 178.15 | 5229   | 0.07  | 222.10 | 18423   | 0.23   |
| 135.15 | 64977  | 0.81 | 179.10 | 71545  | 0.89  | 223.10 | 2447    | 0.03   |
| 136.15 | 8864   | 0.11 | 180.05 | 11086  | 0.14  | 224.05 | 858     | 0.01   |
| 137.10 | 29574  | 0.37 | 181.05 | 6429   | 0.08  | 225.05 | 1013    | 0.01   |
| 138.15 | 3547   | 0.04 | 182.10 | 5007   | 0.06  | 226.15 | 1248    | 0.02   |
| 139.10 | 5551   | 0.07 | 183.10 | 10970  | 0.14  | 227.10 | 3078    | 0.04   |
| 140.15 | 3589   | 0.04 | 184.15 | 6720   | 0.08  | 228.25 | 1016    | 0.01   |
| 141.10 | 77513  | 0.97 | 185.10 | 36486  | 0.46  | 229.15 | 14139   | 0.18   |
| 142.10 | 66934  | 0.84 | 186.15 | 10234  | 0.13  | 230.20 | 4497    | 0.06   |
| 143.10 | 120922 | 1.51 | 187.10 | 70980  | 0.89  | 231.15 | 57810   | 0.72   |
| 144.15 | 45644  | 0.57 | 188.10 | 39818  | 0.50  | 232.10 | 11047   | 0.14   |
| 145.10 | 152068 | 1.90 | 189.10 | 223390 | 2.79  | 233.15 | 27422   | 0.34   |
| 146.15 | 38774  | 0.48 | 190.10 | 35497  | 0.44  | 234.25 | 11663   | 0.15   |
| 147.10 | 234772 | 2.94 | 191.10 | 24495  | 0.31  | 235.15 | 337732  | 4.22   |
| 148.10 | 34481  | 0.43 | 192.15 | 7657   | 0.10  | 236.10 | 55956   | 0.70   |
| 149.10 | 66847  | 0.84 | 193.05 | 139097 | 1.74  | 237.10 | 6166    | 0.08   |
| 150.10 | 9074   | 0.11 | 194.10 | 26116  | 0.33  | 238.15 | 686     | 0.01   |
| 151.10 | 6343   | 0.08 | 195.05 | 6901   | 0.09  | 239.05 | 913     | 0.01   |
| 152.05 | 11515  | 0.14 | 196.10 | 1879   | 0.02  | 240.10 | 3158    | 0.04   |
| 153.10 | 25454  | 0.32 | 197.10 | 6482   | 0.08  | 241.05 | 1301    | 0.02   |
| 154.10 | 17841  | 0.22 | 198.10 | 3868   | 0.05  | 242.05 | 476     | 0.01   |
| 155.10 | 44519  | 0.56 | 199.10 | 7734   | 0.10  | 243.15 | 3197    | 0.04   |
| 156.10 | 40398  | 0.51 | 200.15 | 3420   | 0.04  | 244.25 | 3779    | 0.05   |
| 157.10 | 58356  | 0.73 | 201.10 | 28761  | 0.36  | 245.15 | 156466  | 1.96   |
| 158.10 | 22446  | 0.28 | 202.15 | 17182  | 0.21  | 246.15 | 30659   | 0.38   |
| 159.10 | 70662  | 0.88 | 203.10 | 907796 | 11.35 | 247.15 | 9479    | 0.12   |

|        |         |       |        |        |      |               |               |              |
|--------|---------|-------|--------|--------|------|---------------|---------------|--------------|
| 248.15 | 2508    | 0.03  | 289.20 | 19556  | 0.24 | 330.00        | 167           | 0.00         |
| 249.10 | 102081  | 1.28  | 290.25 | 6051   | 0.08 | 331.00        | 182           | 0.00         |
| 250.10 | 19110   | 0.24  | 291.20 | 143193 | 1.79 | 332.00        | 62            | 0.00         |
| 251.10 | 5425    | 0.07  | 292.15 | 29289  | 0.37 | 333.00        | 74            | 0.00         |
| 252.05 | 1025    | 0.01  | 293.15 | 3871   | 0.05 | 334.10        | 145           | 0.00         |
| 252.95 | 1721    | 0.02  | 294.15 | 653    | 0.01 | 335.05        | 653           | 0.01         |
| 254.15 | 942     | 0.01  | 295.15 | 743    | 0.01 | 336.10        | 129           | 0.00         |
| 255.10 | 1071    | 0.01  | 296.00 | 142    | 0.00 | 337.10        | 190           | 0.00         |
| 255.90 | 254     | 0.00  | 297.00 | 1172   | 0.01 | 338.10        | 119           | 0.00         |
| 256.90 | 414     | 0.01  | 298.00 | 215    | 0.00 | 339.10        | 172           | 0.00         |
| 258.25 | 884     | 0.01  | 299.00 | 394    | 0.00 | 340.00        | 385           | 0.00         |
| 259.20 | 11455   | 0.14  | 300.00 | 121    | 0.00 | 341.05        | 5595          | 0.07         |
| 260.25 | 99241   | 1.24  | 301.00 | 151    | 0.00 | 342.05        | 2148          | 0.03         |
| 261.20 | 1011318 | 12.65 | 302.00 | 74     | 0.00 | 343.05        | 2356          | 0.03         |
| 262.20 | 203470  | 2.54  | 303.05 | 402    | 0.01 | 343.90        | 660           | 0.01         |
| 263.15 | 33651   | 0.42  | 304.25 | 3560   | 0.04 | 345.10        | 935           | 0.01         |
| 264.10 | 4510    | 0.06  | 305.20 | 293572 | 3.67 | 346.25        | 873           | 0.01         |
| 265.05 | 1827    | 0.02  | 306.20 | 166860 | 2.09 | 347.25        | 88104         | 1.10         |
| 266.05 | 632     | 0.01  | 307.20 | 31138  | 0.39 | 348.20        | 20510         | 0.26         |
| 267.00 | 4140    | 0.05  | 308.20 | 4695   | 0.06 | 349.20        | 3463          | 0.04         |
| 268.05 | 1089    | 0.01  | 309.15 | 706    | 0.01 | 350.20        | 375           | 0.00         |
| 269.10 | 1428    | 0.02  | 310.20 | 154    | 0.00 | 351.20        | 42            | 0.00         |
| 270.05 | 506     | 0.01  | 311.20 | 334    | 0.00 | 352.20        | 62            | 0.00         |
| 271.00 | 1066    | 0.01  | 312.00 | 154    | 0.00 | 353.20        | 135           | 0.00         |
| 272.10 | 300     | 0.00  | 313.00 | 1055   | 0.01 | 354.10        | 76            | 0.00         |
| 273.15 | 2222    | 0.03  | 314.10 | 399    | 0.00 |               |               |              |
| 274.25 | 588     | 0.01  | 315.10 | 281    | 0.00 | 355.05        | 5282          | 0.07         |
| 275.15 | 6343    | 0.08  | 316.10 | 300    | 0.00 | 356.00        | 1679          | 0.02         |
| 276.20 | 1570    | 0.02  | 317.10 | 44     | 0.00 | 357.05        | 1206          | 0.02         |
| 277.20 | 3130    | 0.04  | 318.10 | 50     | 0.00 | 358.05        | 690           | 0.01         |
| 278.15 | 614     | 0.01  | 319.10 | 87     | 0.00 | 359.05        | 1002          | 0.01         |
| 279.10 | 425     | 0.01  | 320.10 | 82     | 0.00 | 360.05        | 326           | 0.00         |
| 280.05 | 301     | 0.00  | 321.10 | 90     | 0.00 | <b>361.35</b> | <b>11494</b>  | <b>0.14</b>  |
| 281.05 | 9258    | 0.12  | 322.10 | 76     | 0.00 | <b>362.25</b> | <b>858878</b> | <b>10.74</b> |
| 282.05 | 2848    | 0.04  | 323.10 | 249    | 0.00 | <b>363.25</b> | <b>221507</b> | <b>2.77</b>  |
| 283.05 | 3392    | 0.04  | 324.10 | 217    | 0.00 | 364.25        | 33198         | 0.42         |
| 284.05 | 1010    | 0.01  | 325.05 | 980    | 0.01 | 365.25        | 3985          | 0.05         |
| 285.05 | 911     | 0.01  | 326.00 | 2215   | 0.03 | 366.15        | 388           | 0.00         |
| 286.00 | 284     | 0.00  | 327.00 | 3666   | 0.05 | 367.20        | 201           | 0.00         |
| 287.15 | 1007    | 0.01  | 327.95 | 1088   | 0.01 | 368.10        | 134           | 0.00         |
| 288.25 | 779     | 0.01  | 329.00 | 959    | 0.01 |               |               |              |

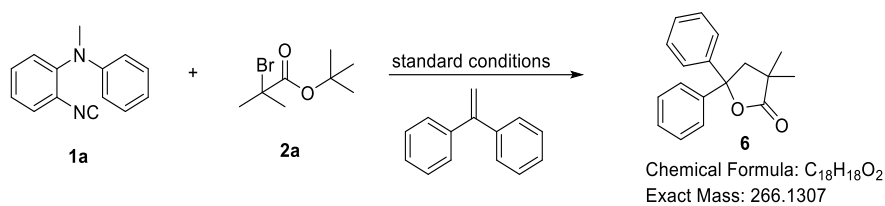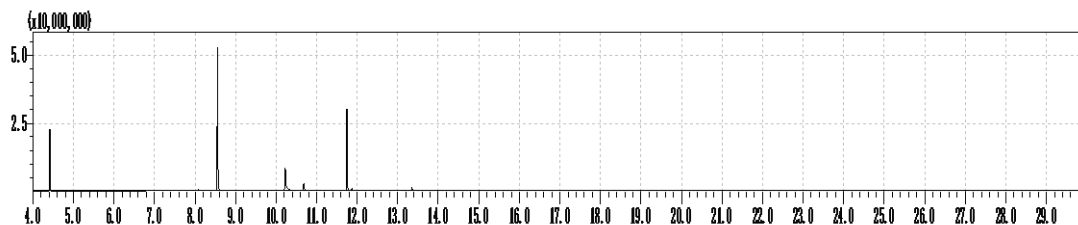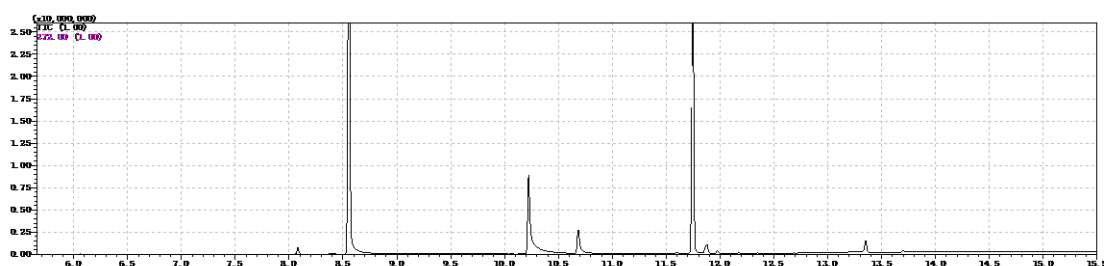

MS spectra of the peak at 11.749 min

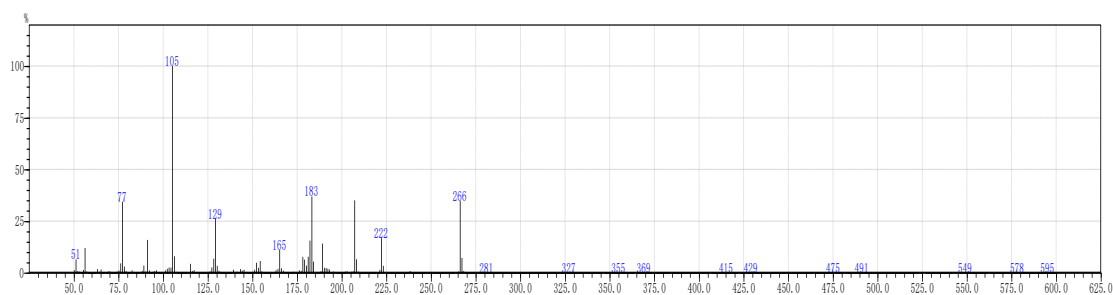

[MS Spectrum]

# of Peaks 537

Raw Spectrum 11.750 (scan : 1551)

Background No Background Spectrum

Base Peak m/z 105.05 (Inten : 5,971,653)

Event# 1

| m/z          | Absolute Intensity | Relative Intensity |
|--------------|--------------------|--------------------|
| 50.0577445   | 1.30               | 59.051562 0.03     |
| 51.00393292  | 6.59               | 60.053540.01       |
| 52.0550576   | 0.85               | 61.052491 0.04     |
| 53.0034466   | 0.58               | 62.0522705 0.38    |
| 54.1510354   | 0.17               | 63.05105790 1.77   |
| 55.1585048   | 1.42               | 64.0530253 0.51    |
| 56.05757084  | 12.68              | 65.05100354 1.68   |
| 57.0537101   | 0.62               | 66.058535 0.14     |
| 58.052121    | 0.04               | 67.0511591 0.19    |
| 68.056108    | 0.10               |                    |
| 69.0535882   | 0.60               |                    |
| 70.0041250   | 0.69               |                    |
| 70.953780    | 0.06               |                    |
| 72.057980.01 |                    |                    |
| 73.056600    | 0.11               |                    |
| 74.0036238   | 0.61               |                    |
| 75.0568312   | 1.14               |                    |
| 76.05270163  | 4.52               |                    |

|              |         |        |         |       |        |         |       |
|--------------|---------|--------|---------|-------|--------|---------|-------|
| 77.052104186 | 35.24   | 121.10 | 1118    | 0.02  | 165.05 | 576880  | 9.66  |
| 78.05186486  | 3.12    | 122.05 | 1644    | 0.03  | 166.05 | 108960  | 1.82  |
| 79.0556067   | 0.94    | 123.00 | 1250    | 0.02  | 167.05 | 55891   | 0.94  |
| 80.553598    | 0.06    | 124.05 | 1339    | 0.02  | 168.10 | 8321    | 0.14  |
| 81.5528044   | 0.47    | 125.10 | 6210    | 0.10  | 169.05 | 992     | 0.02  |
| 82.5068313   | 1.14    | 126.10 | 46540   | 0.78  | 170.00 | 193     | 0.00  |
| 83.4516796   | 0.28    | 127.10 | 152484  | 2.55  | 171.00 | 273     | 0.00  |
| 84.452176    | 0.04    | 128.10 | 395974  | 6.63  | 172.05 | 400     | 0.01  |
| 85.051869    | 0.03    | 129.10 | 1495985 | 25.05 | 173.05 | 29741   | 0.50  |
| 86.0511884   | 0.20    | 130.10 | 188775  | 3.16  | 174.00 | 6865    | 0.11  |
| 87.0525985   | 0.44    | 131.10 | 56953   | 0.95  | 175.05 | 6453    | 0.11  |
| 88.1055270   | 0.93    | 132.10 | 6769    | 0.11  | 176.05 | 61939   | 1.04  |
| 89.05198213  | 3.32    | 133.10 | 4318    | 0.07  | 177.15 | 48611   | 0.81  |
| 90.1547538   | 0.80    | 134.15 | 736     | 0.01  | 178.05 | 384464  | 6.44  |
| 91.05976490  | 16.35   | 135.05 | 1679    | 0.03  | 179.05 | 318420  | 5.33  |
| 92.0567315   | 1.13    | 136.15 | 522     | 0.01  | 180.05 | 141423  | 2.37  |
| 93.155869    | 0.10    | 137.05 | 7824    | 0.13  | 181.05 | 415439  | 6.96  |
| 94.1531561   | 0.53    | 138.15 | 9559    | 0.16  | 182.05 | 866211  | 14.51 |
| 95.0548912   | 0.82    | 139.10 | 86817   | 1.45  | 183.05 | 2032609 | 34.04 |
| 96.0572027   | 1.21    | 140.10 | 12686   | 0.21  | 184.05 | 285618  | 4.78  |
| 97.057420    | 0.12    | 141.10 | 30970   | 0.52  | 185.00 | 21593   | 0.36  |
| 98.108575    | 0.14    | 142.15 | 10469   | 0.18  | 186.00 | 1478    | 0.02  |
| 99.058345    | 0.14    | 143.10 | 103559  | 1.73  | 187.05 | 4270    | 0.07  |
| 100.15       | 15511   | 144.10 | 57927   | 0.97  | 188.15 | 40923   | 0.69  |
| 101.10       | 65854   | 145.10 | 85289   | 1.43  | 189.05 | 754157  | 12.63 |
| 102.10       | 112268  | 146.10 | 10190   | 0.17  | 190.05 | 129386  | 2.17  |
| 103.10       | 147340  | 147.05 | 2037    | 0.03  | 191.05 | 122400  | 2.05  |
| 104.15       | 152804  | 148.15 | 439     | 0.01  | 192.05 | 100879  | 1.69  |
| 105.05       | 5971653 | 149.10 | 3185    | 0.05  | 193.05 | 78990   | 1.32  |
| 106.05       | 463827  | 150.10 | 27090   | 0.45  | 194.05 | 15646   | 0.26  |
| 107.10       | 30028   | 151.10 | 80762   | 1.35  | 195.05 | 30921   | 0.52  |
| 108.05       | 4104    | 152.05 | 261494  | 4.38  | 196.05 | 9379    | 0.16  |
| 109.15       | 2577    | 153.10 | 131265  | 2.20  | 197.00 | 1266    | 0.02  |
| 110.10       | 5863    | 154.10 | 311713  | 5.22  | 198.05 | 499     | 0.01  |
| 111.05       | 5012    | 155.10 | 40558   | 0.68  | 199.05 | 664     | 0.01  |
| 112.15       | 2333    | 156.05 | 2911    | 0.05  | 200.00 | 5927    | 0.10  |
| 113.05       | 26651   | 157.10 | 724     | 0.01  | 201.00 | 7041    | 0.12  |
| 114.15       | 15955   | 158.15 | 487     | 0.01  | 202.05 | 39705   | 0.66  |
| 115.10       | 255750  | 159.05 | 6036    | 0.10  | 203.05 | 33960   | 0.57  |
| 116.10       | 48113   | 160.10 | 2554    | 0.04  | 204.00 | 18479   | 0.31  |
| 117.10       | 76118   | 161.10 | 13071   | 0.22  | 205.05 | 24522   | 0.41  |
| 118.10       | 11903   | 162.15 | 8020    | 0.13  | 206.15 | 39956   | 0.67  |
| 119.10       | 20694   | 163.05 | 69195   | 1.16  | 207.10 | 1849436 | 30.97 |
| 120.05       | 2699    | 164.10 | 102956  | 1.72  | 208.05 | 328826  | 5.51  |

|        |        |       |        |       |      |               |                |              |
|--------|--------|-------|--------|-------|------|---------------|----------------|--------------|
| 209.05 | 29460  | 0.49  | 232.05 | 762   | 0.01 | 254.00        | 63             | 0.00         |
| 210.05 | 2561   | 0.04  | 233.05 | 2691  | 0.05 | 255.00        | 97             | 0.00         |
| 211.10 | 358    | 0.01  | 234.05 | 1577  | 0.03 | 256.00        | 137            | 0.00         |
| 212.00 | 185    | 0.00  | 235.10 | 1430  | 0.02 | 257.00        | 36             | 0.00         |
| 213.00 | 962    | 0.02  | 236.05 | 1557  | 0.03 | 258.00        | 47             | 0.00         |
| 214.05 | 384    | 0.01  | 237.15 | 4990  | 0.08 | 259.00        | 31             | 0.00         |
| 215.05 | 2818   | 0.05  | 238.10 | 39902 | 0.67 | 260.00        | 18             | 0.00         |
| 216.10 | 924    | 0.02  | 239.05 | 7268  | 0.12 | 261.00        | 42             | 0.00         |
| 217.05 | 801    | 0.01  | 240.05 | 1511  | 0.03 | 262.10        | 126            | 0.00         |
| 218.05 | 1636   | 0.03  | 241.10 | 122   | 0.00 | 263.10        | 5124           | 0.09         |
| 219.05 | 3241   | 0.05  | 242.10 | 108   | 0.00 | 264.15        | 4914           | 0.08         |
| 220.15 | 4129   | 0.07  | 243.10 | 16    | 0.00 | <b>265.15</b> | <b>27727</b>   | <b>0.46</b>  |
| 221.15 | 72453  | 1.21  | 244.10 | 31    | 0.00 | <b>266.10</b> | <b>1657436</b> | <b>27.76</b> |
| 222.10 | 863134 | 14.45 | 245.10 | 42    | 0.00 | <b>267.10</b> | <b>335959</b>  | <b>5.63</b>  |
| 223.10 | 168956 | 2.83  | 246.10 | 74    | 0.00 | 268.05        | 38532          | 0.65         |
| 224.05 | 16098  | 0.27  | 247.10 | 266   | 0.00 | 269.05        | 3582           | 0.06         |
| 225.05 | 1186   | 0.02  | 248.10 | 1023  | 0.02 | 270.10        | 305            | 0.01         |
| 226.10 | 84     | 0.00  | 249.10 | 6319  | 0.11 | 271.10        | 105            | 0.00         |
| 228.10 | 47     | 0.00  | 250.10 | 2498  | 0.04 | 272.10        | 46             | 0.00         |
| 229.10 | 238    | 0.00  | 251.05 | 1165  | 0.02 | 273.10        | 19             | 0.00         |
| 230.10 | 46     | 0.00  | 252.00 | 268   | 0.00 |               |                |              |
| 231.10 | 487    | 0.01  | 253.00 | 318   | 0.01 |               |                |              |

### 3.Reference

- [1] W. Hu, F. Teng, H. Hu, S. Luo and Q. Zhu, *J. Org. Chem.*, **2019**, 84, 6524-6535.
- [2] S. Yuan, X. Ye, J. Cai, Z. Song, Y. Tan, Y. Peng and Q. Ding, *J. Org. Chem.*, **2022**, 87, 1485-1492.

## 4. Spectra

### *tert*-Butyl 2-methyl-2-(5-methyl-5*H*-dibenzo[*b,e*][1,4]diazepin-11-yl)propanoate (3aa)

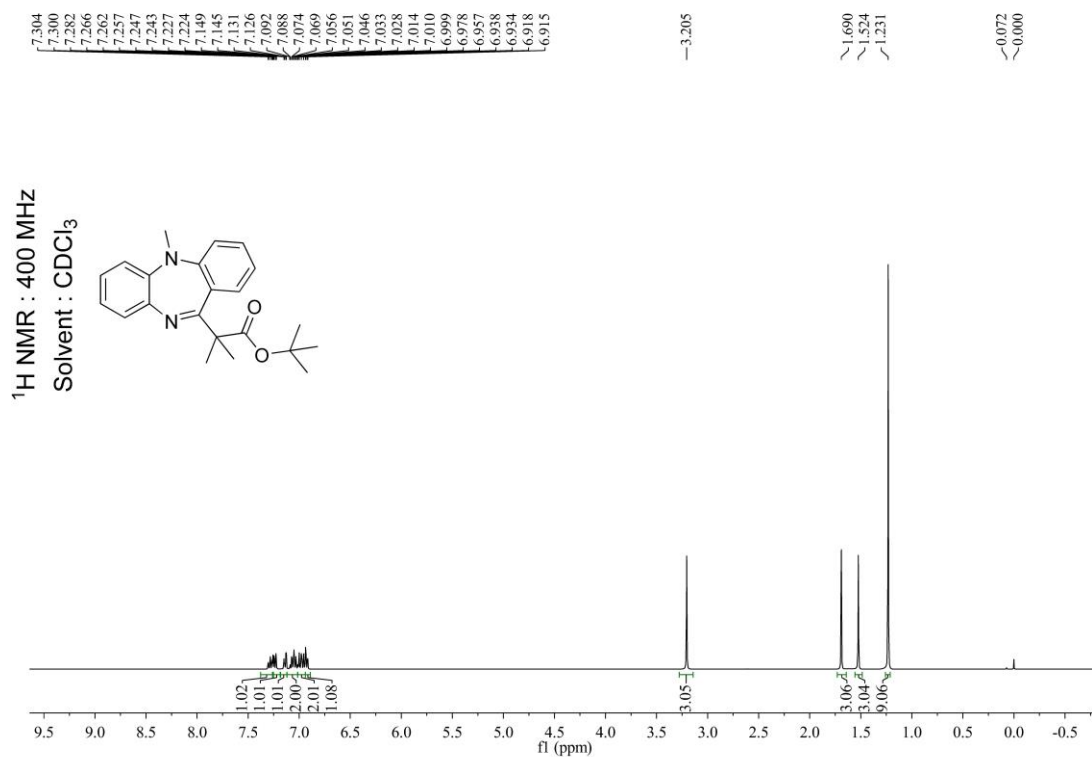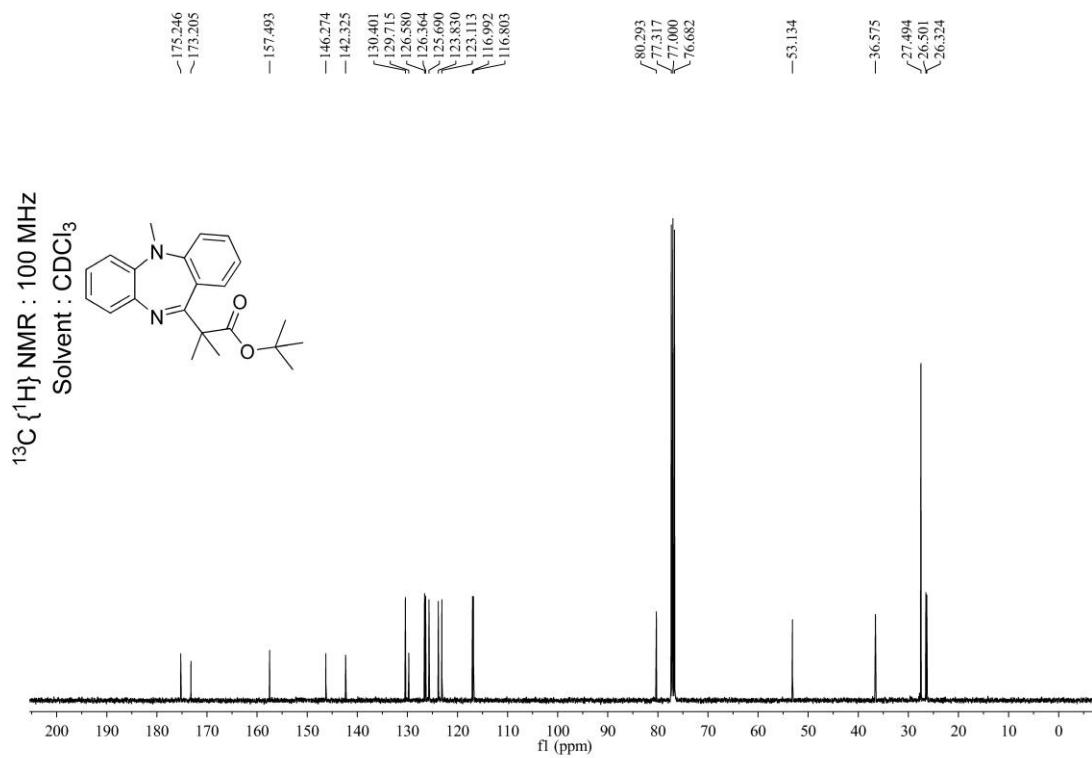



***tert*-Butyl 2-(2,5-dimethyl-5*H*-dibenzo[*b,e*][1,4]diazepin-11-yl)-2-methylpropanoate(3ba)**

<sup>1</sup>H NMR : 400 MHz  
Solvent : CDCl<sub>3</sub>

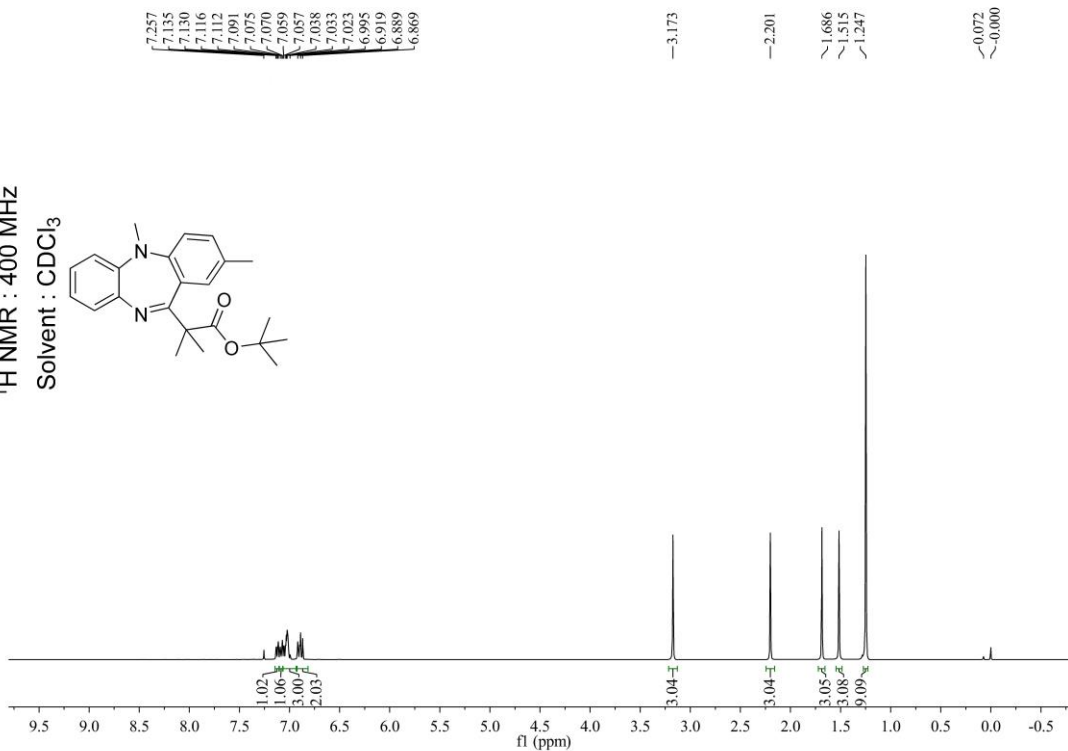

<sup>13</sup>C {<sup>1</sup>H} NMR : 100 MHz  
Solvent : CDCl<sub>3</sub>

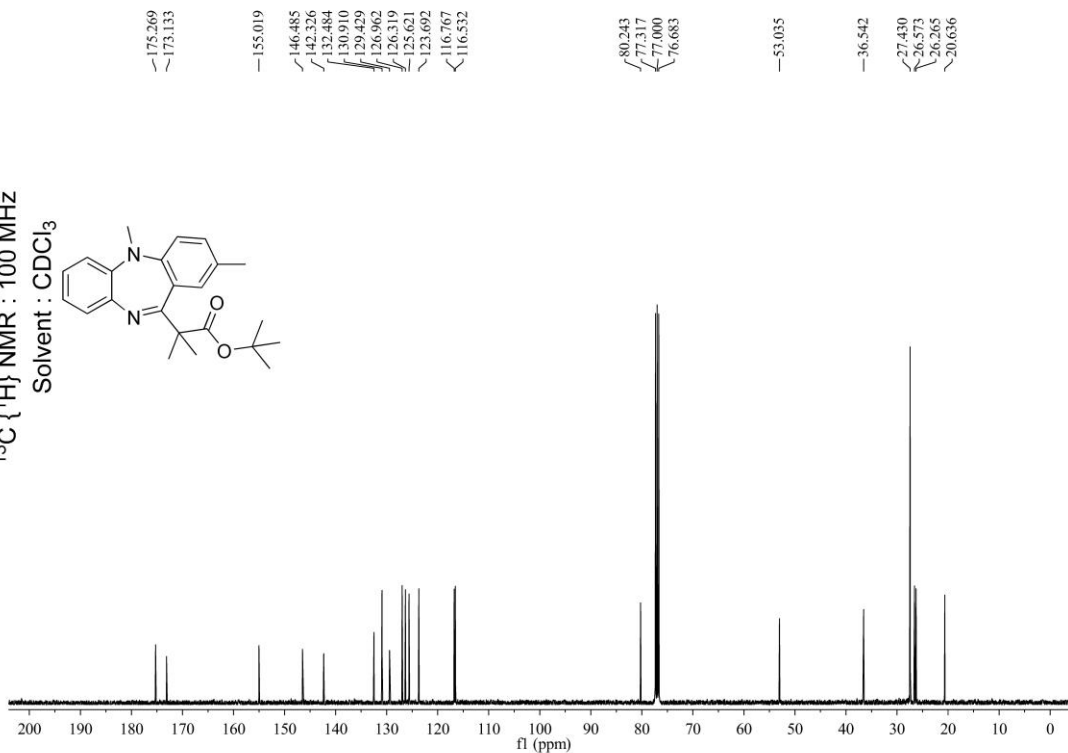

***tert*-Butyl 2-(2-(*tert*-butoxy)-5-methyl-5*H*-dibenzo[*b,e*][1,4]diazepin-11-yl)-2-methylpropanoate(3ca)**

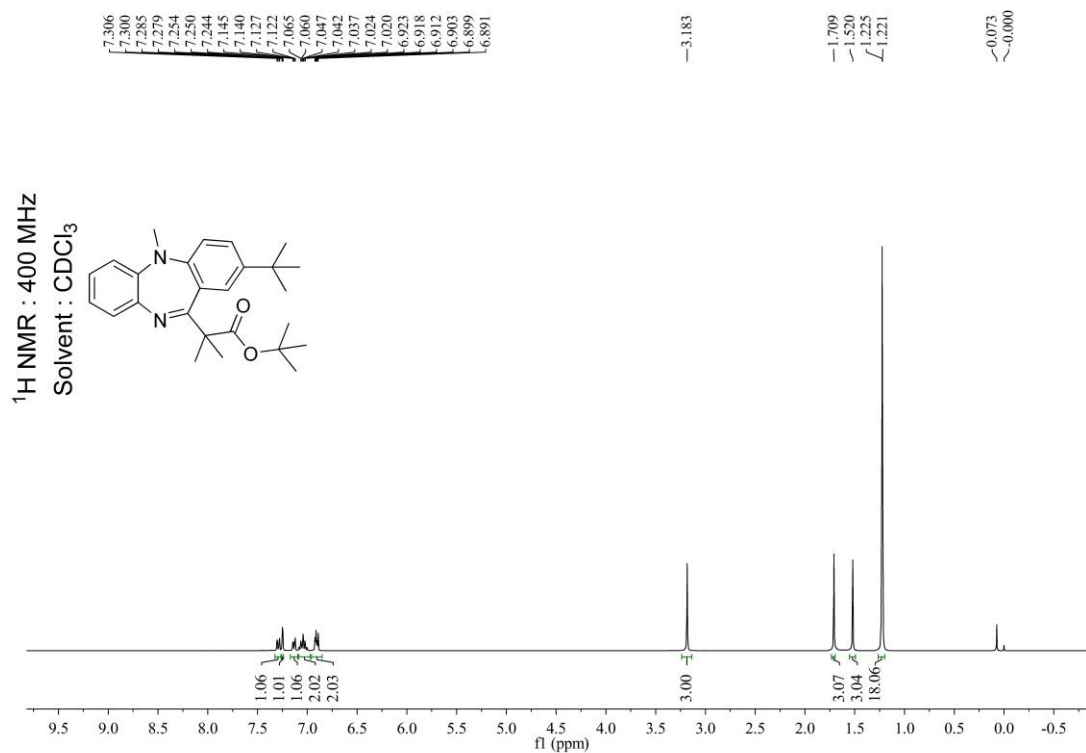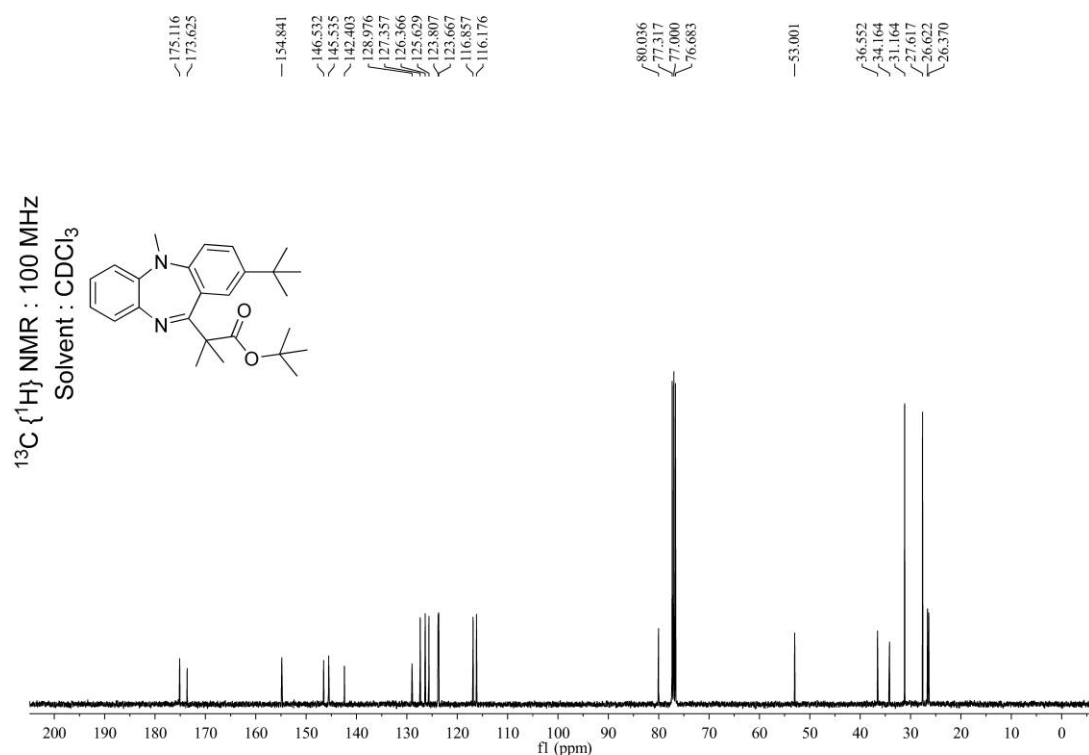

***tert*-Butyl 2-(2-methoxy-5-methyl-5*H*-dibenzo[*b,e*][1,4]diazepin-11-yl)-2-methylpropanoate(3da)**

<sup>1</sup>H NMR : 400 MHz  
Solvent : CDCl<sub>3</sub>

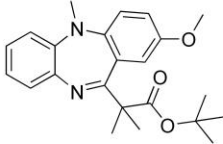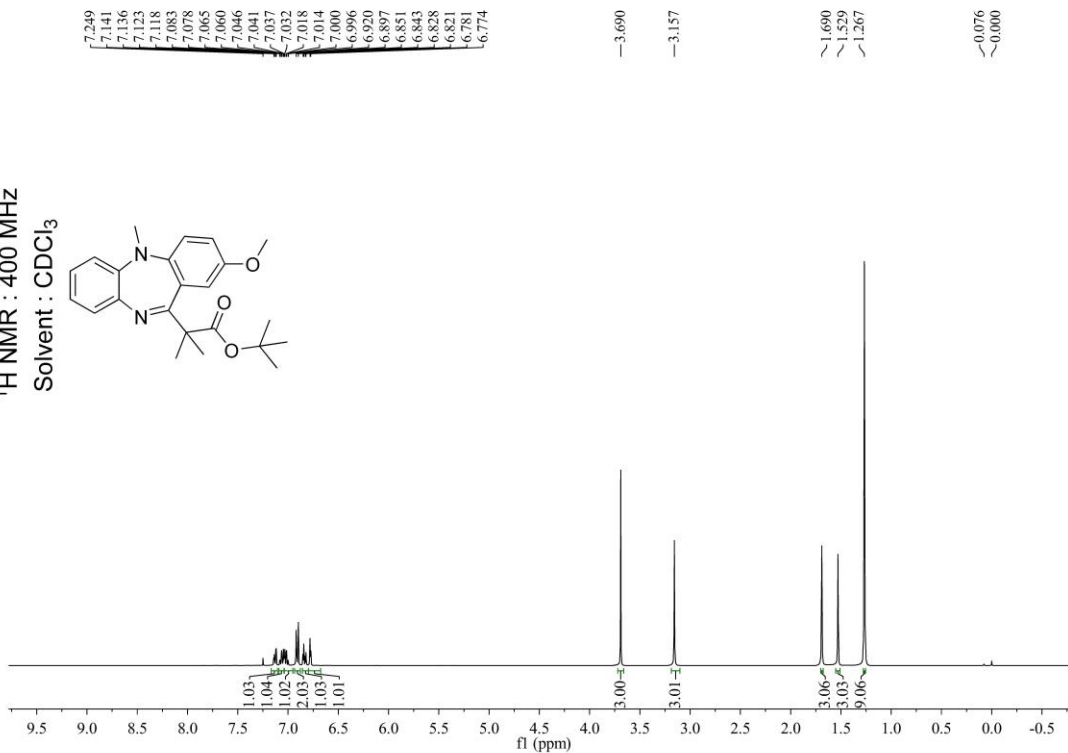

<sup>13</sup>C {<sup>1</sup>H} NMR : 100 MHz  
Solvent : CDCl<sub>3</sub>

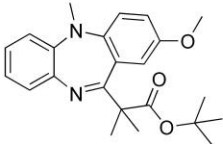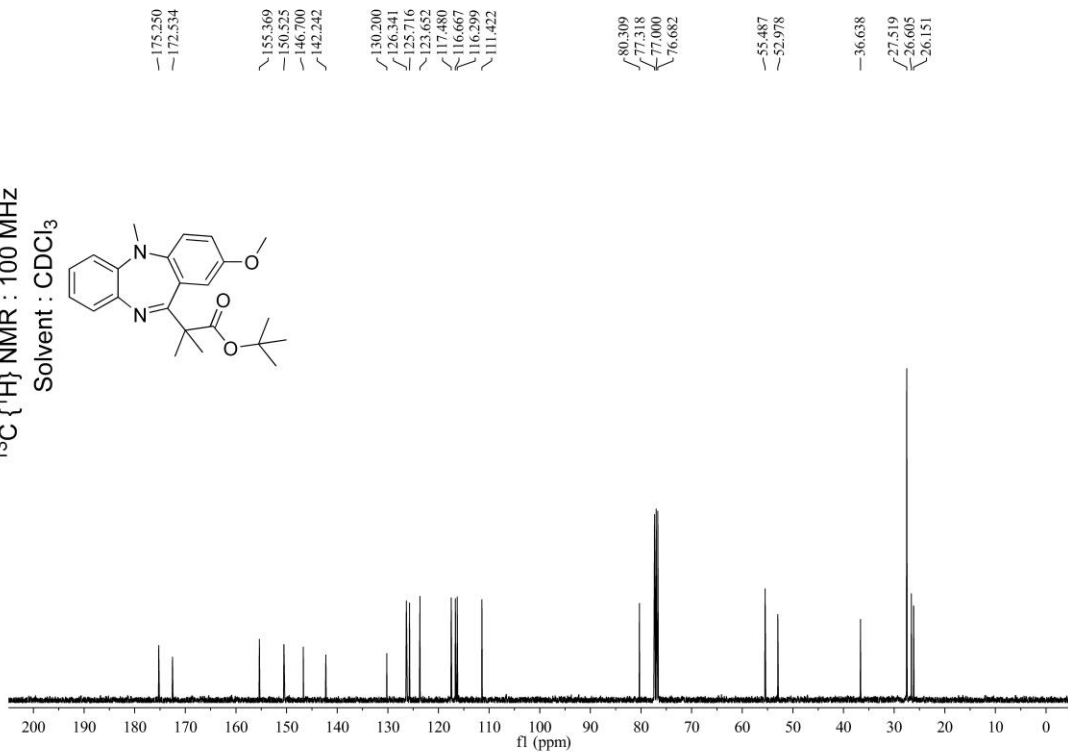

***tert*-Butyl 2-(2-fluoro-5-methyl-5*H*-dibenzo[*b,e*][1,4]diazepin-11-yl)-2-methylpropanoate(3ea)**

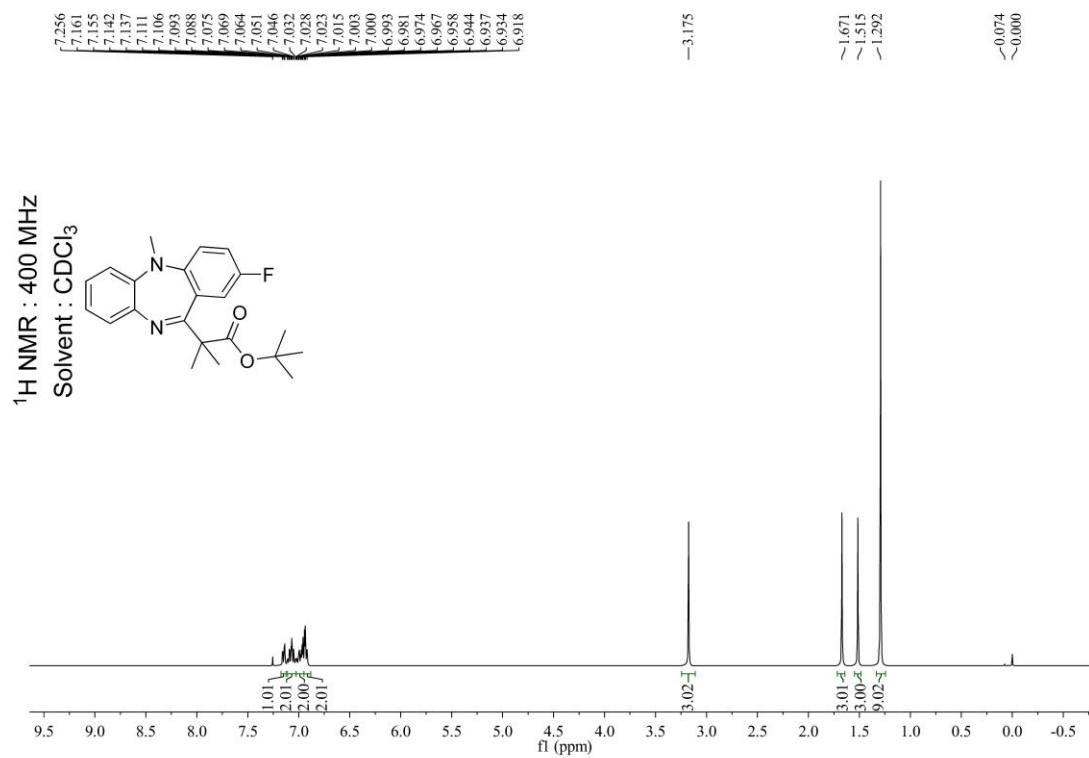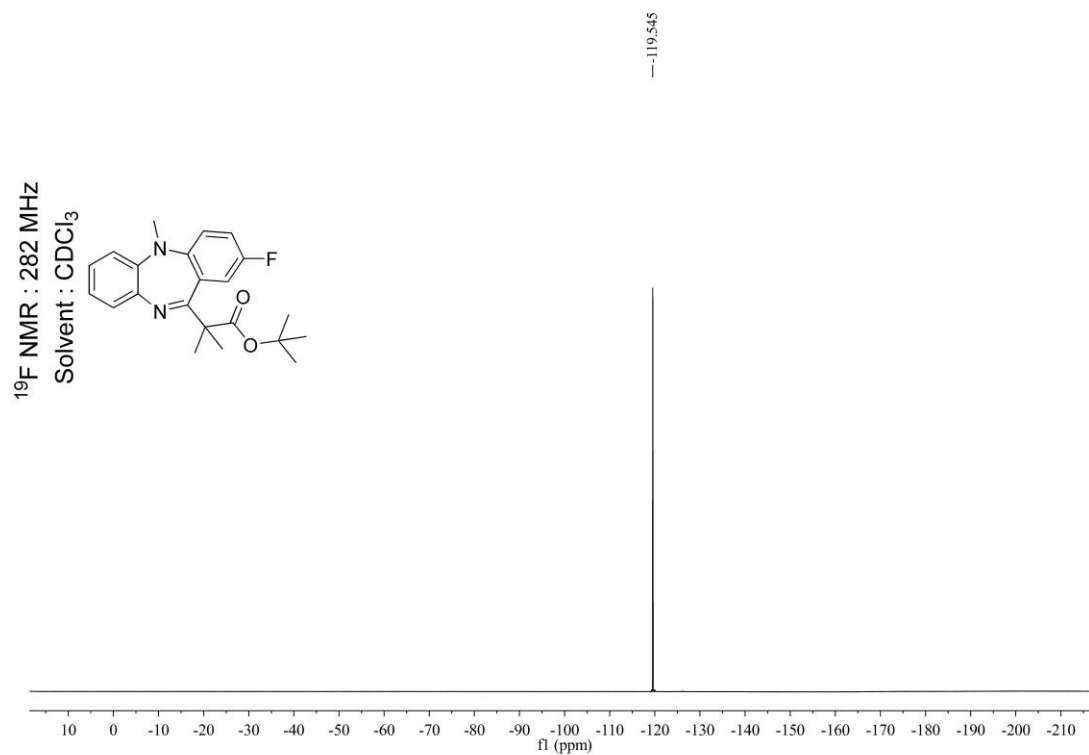

$^{13}\text{C}$  { $^1\text{H}$ } NMR : 100 MHz

Solvent :  $\text{CDCl}_3$

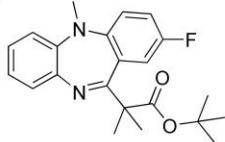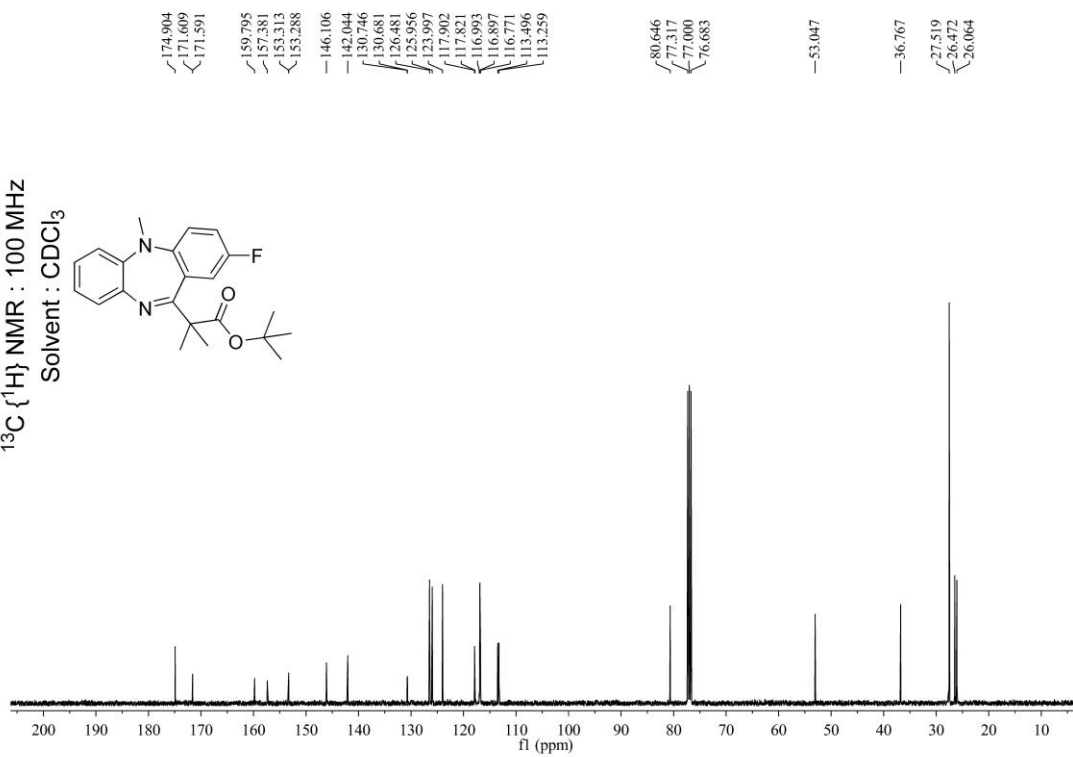

***tert*-Butyl 2-(2-chloro-5-methyl-5*H*-dibenzo[*b,e*][1,4]diazepin-11-yl)-2-methylpropanoate(3fa)**

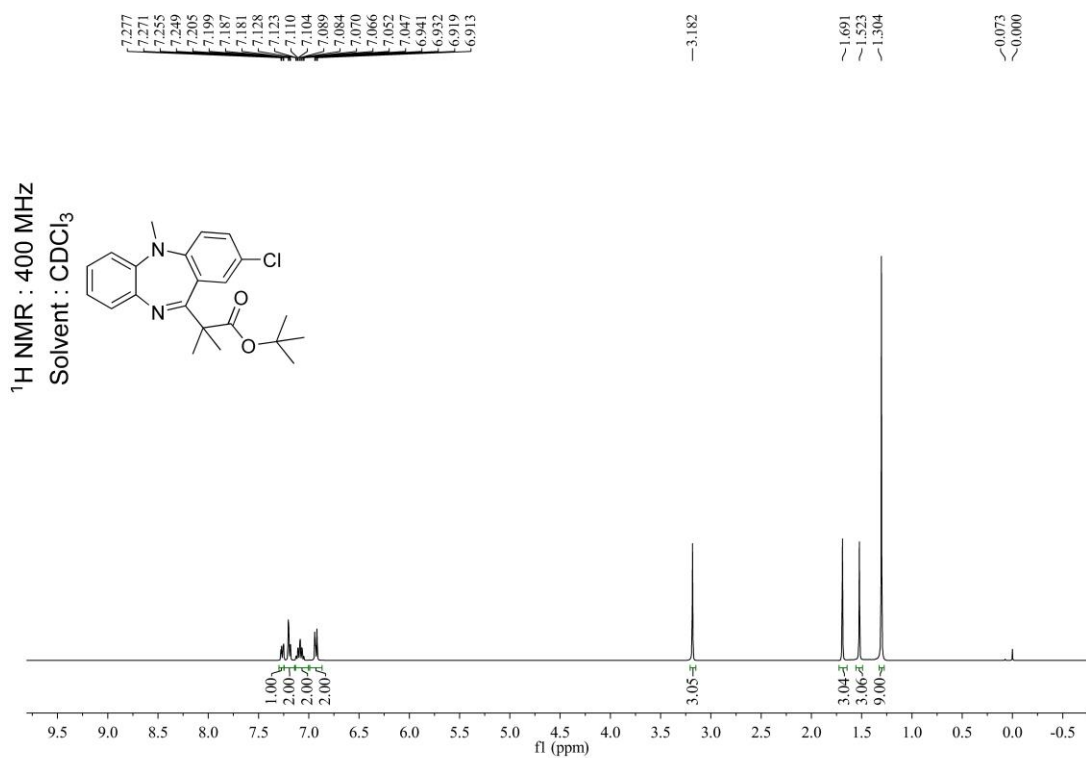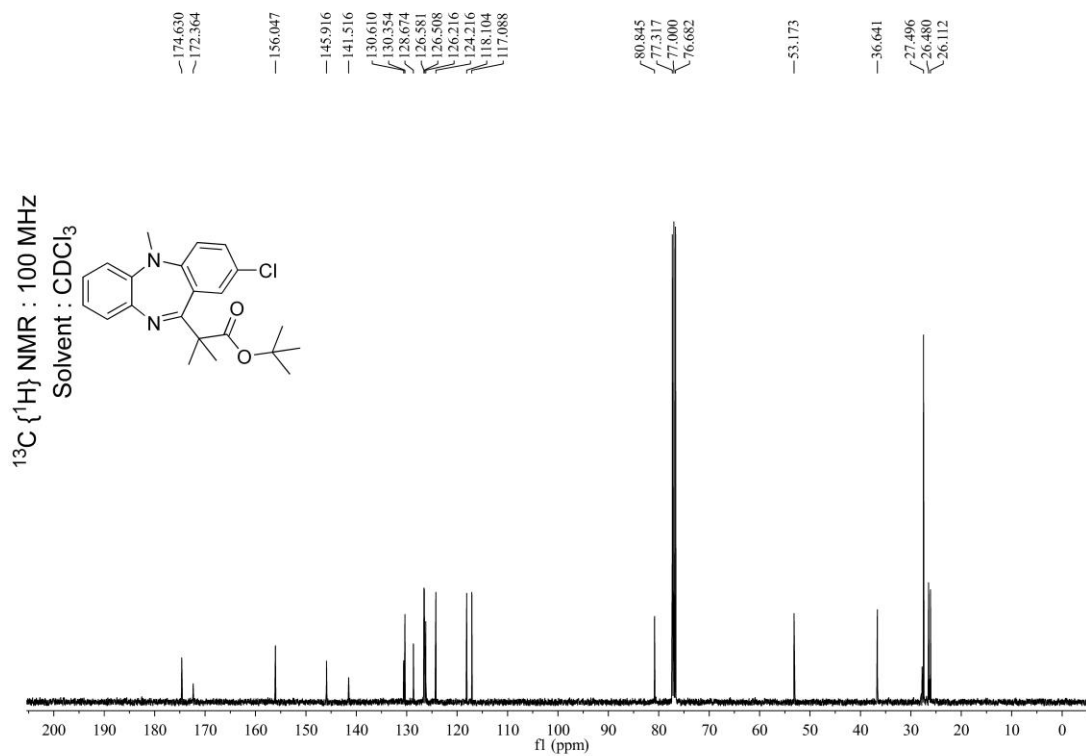

***tert*-Butyl 2-(2-bromo-5-methyl-5*H*-dibenzo[*b,e*][1,4]diazepin-11-yl)-2-methylpropanoate(3ga)**

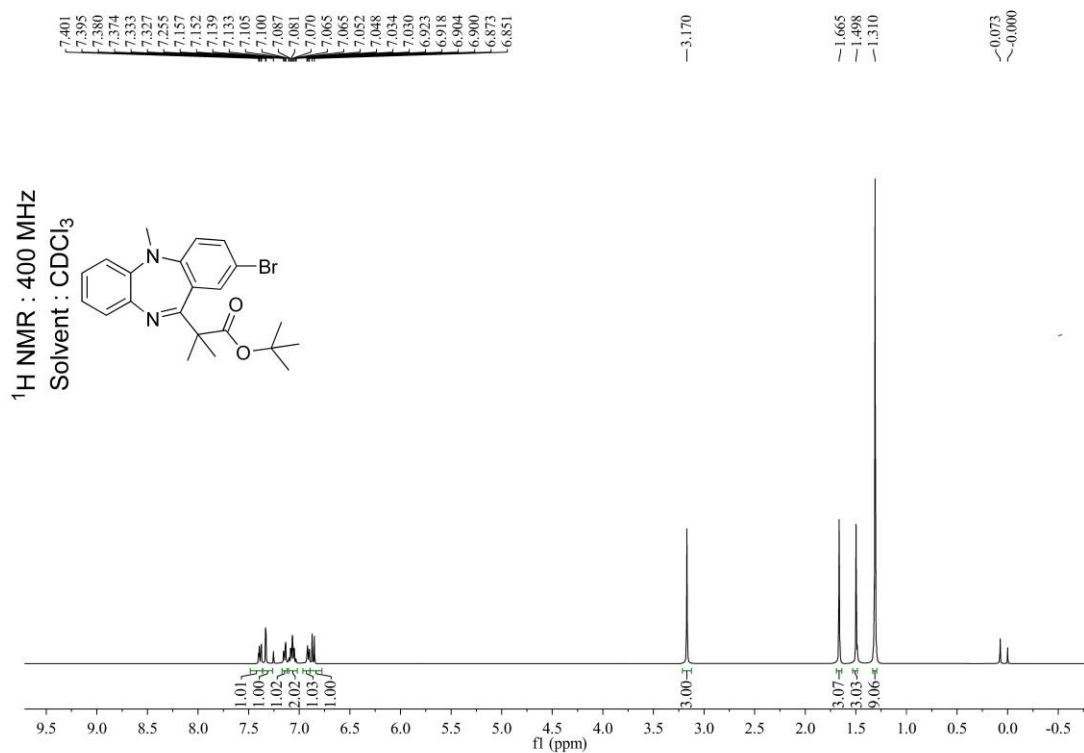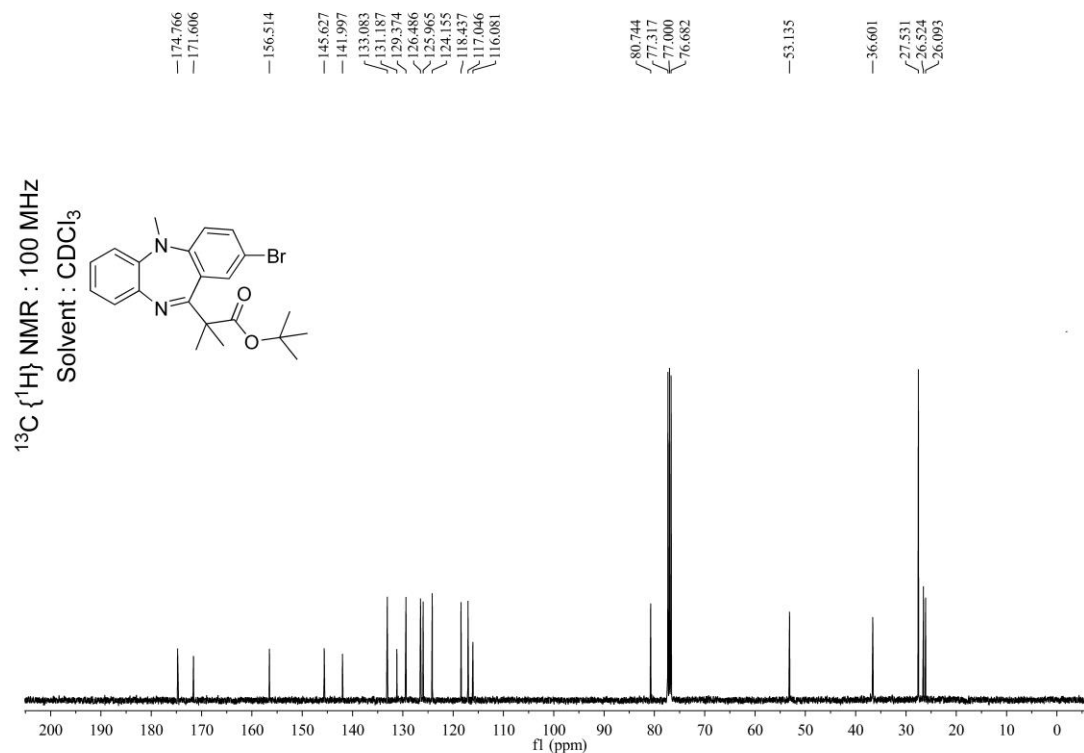

***tert*-Butyl 2-(3-bromo-5-methyl-5*H*-dibenzo[*b,e*][1,4]diazepin-11-yl)-2-methylpropanoate (3ha) and *tert*-butyl 2-(1-bromo-5-methyl-5*H*-dibenzo[*b,e*][1,4]diazepin-11-yl)-2-methylpropanoate(3ha')**

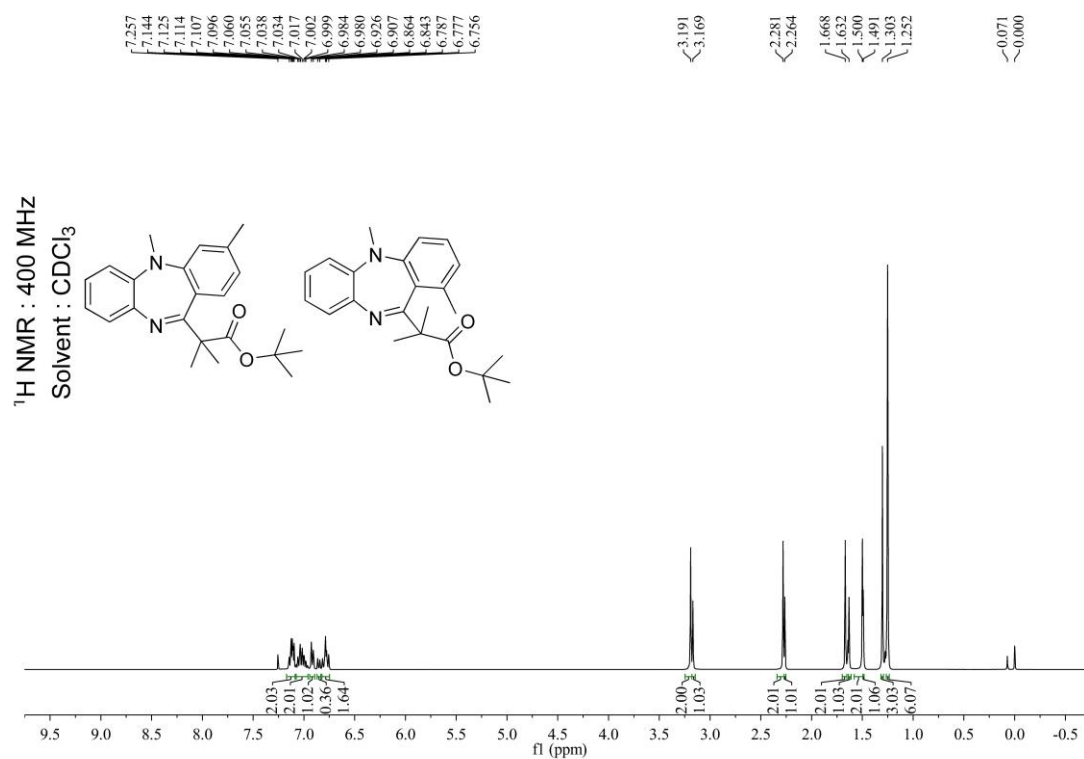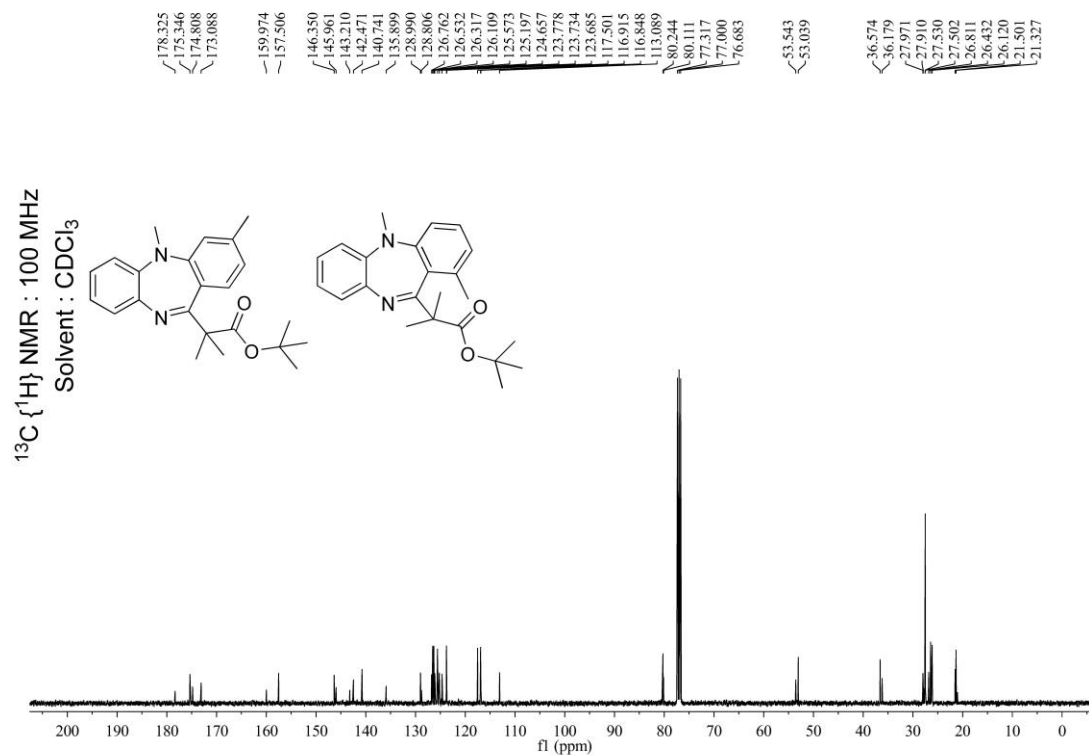



***tert*-Butyl 2-(3-bromo-5-methyl-5*H*-dibenzo[*b,e*][1,4]diazepin-11-yl)-2-methylpropanoate(3ia)**

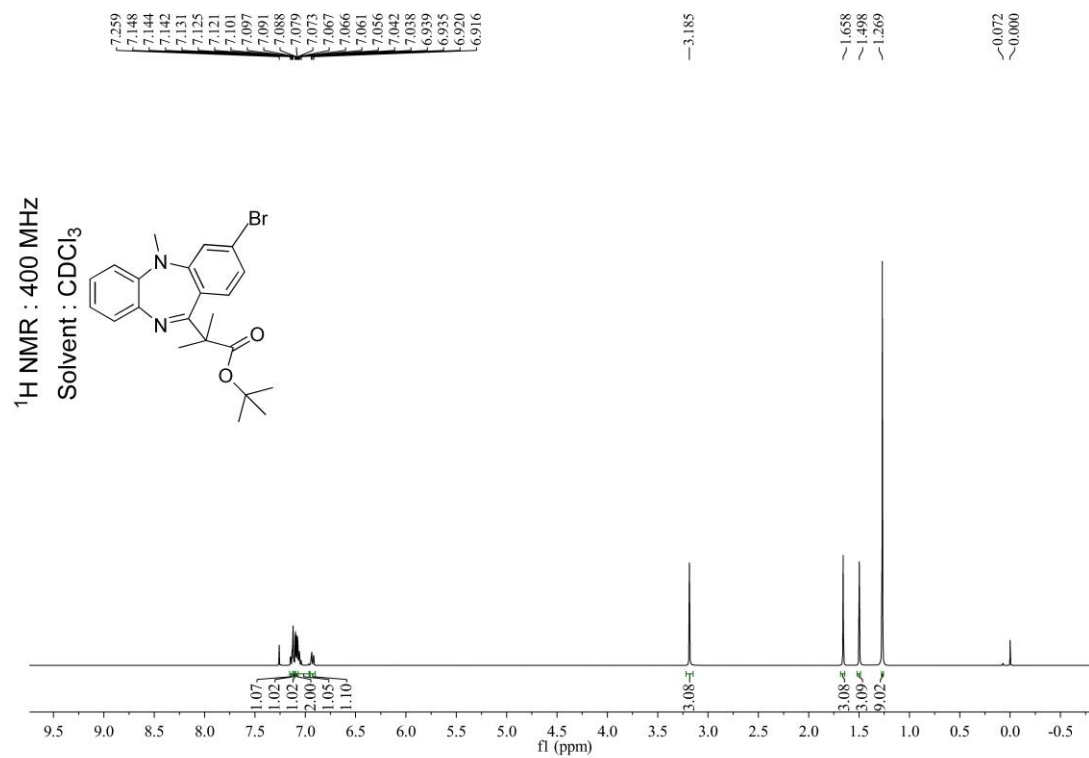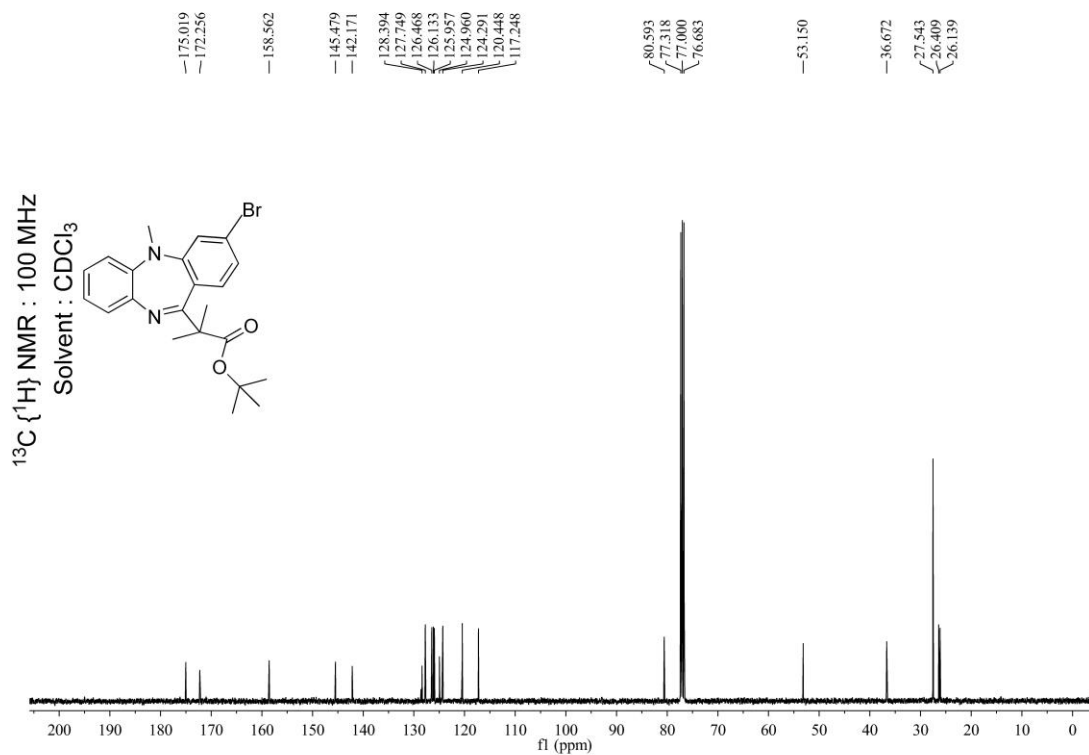

***tert*-Butyl 2-(1-bromo-5-methyl-5*H*-dibenzo[*b,e*][1,4]diazepin-11-yl)-2-methylpropanoate(3ia')**

<sup>1</sup>H NMR : 400 MHz  
Solvent : CDCl<sub>3</sub>

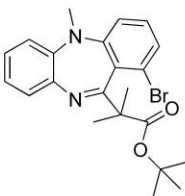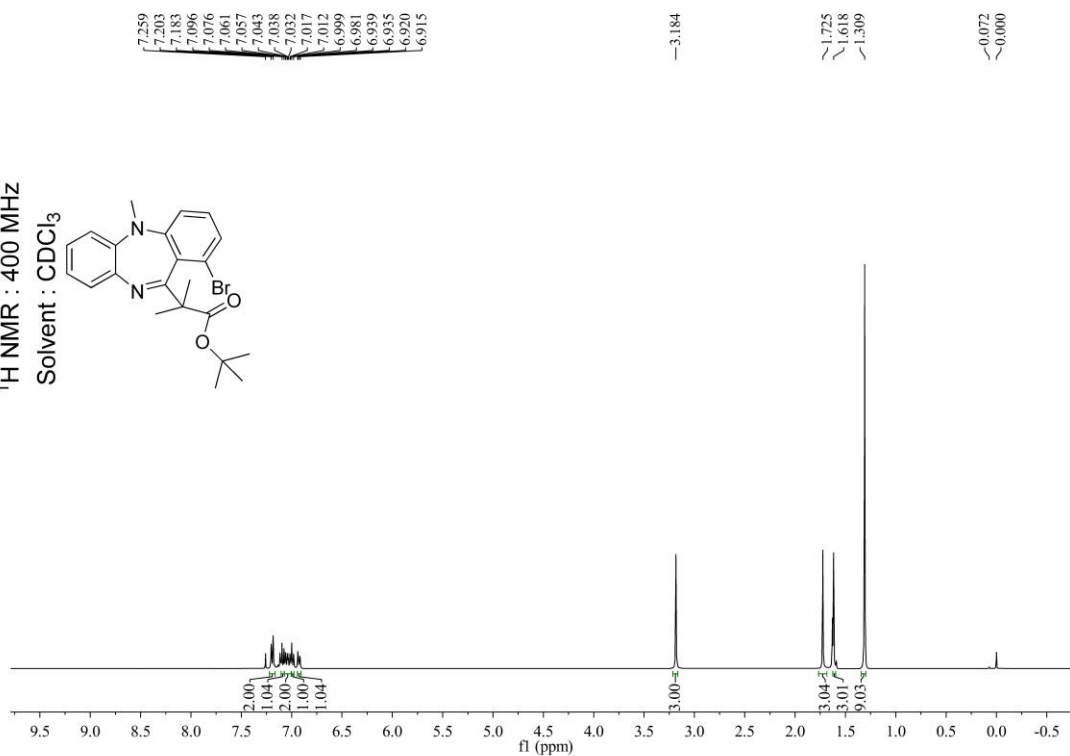

<sup>13</sup>C {<sup>1</sup>H} NMR : 100 MHz  
Solvent : CDCl<sub>3</sub>

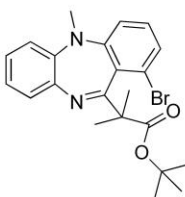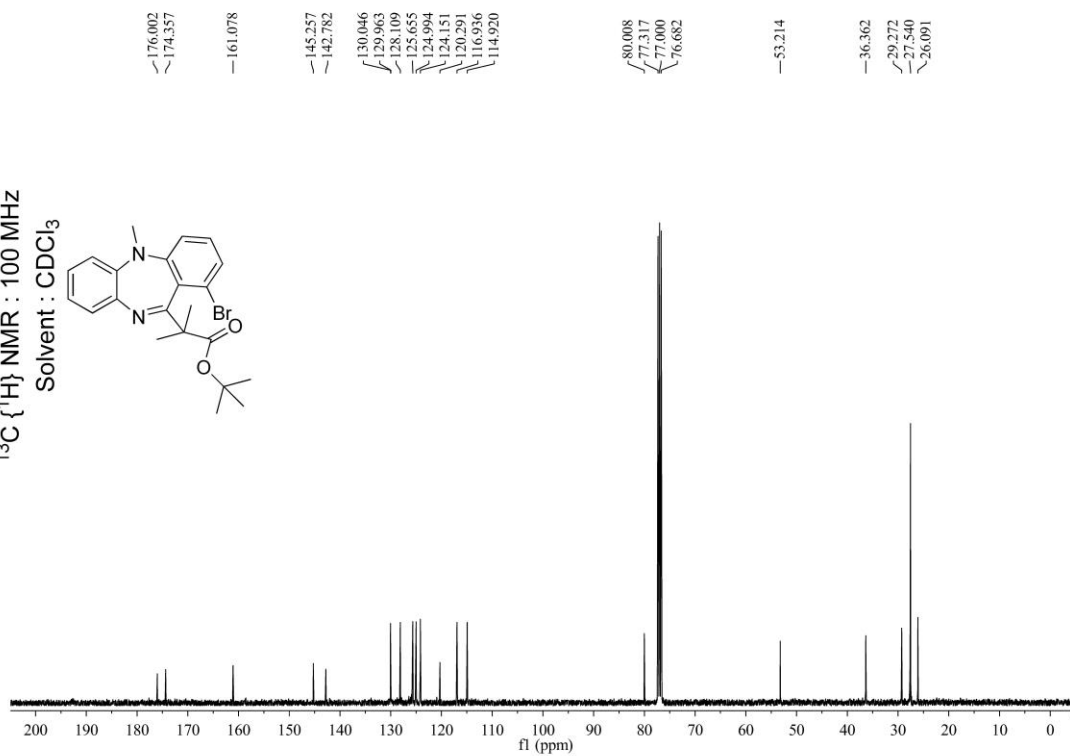

***tert*-Butyl 2-(4,5-dimethyl-5*H*-dibenzo[*b,e*][1,4]diazepin-11-yl)-2-methylpropanoate(3ja)**

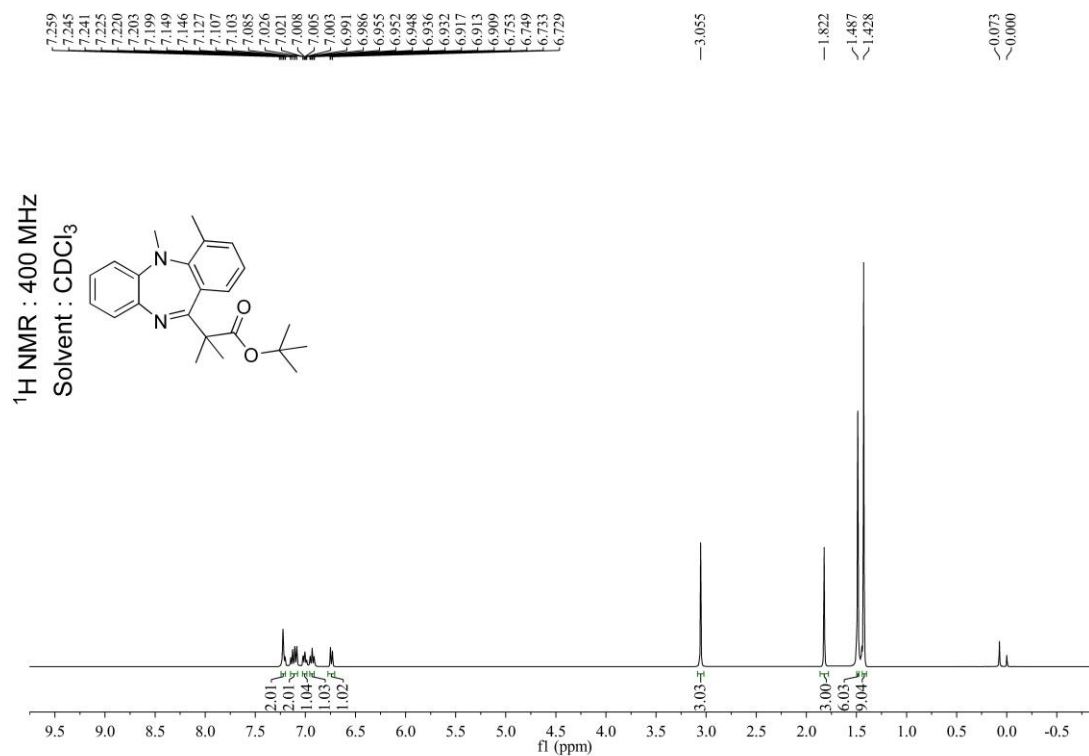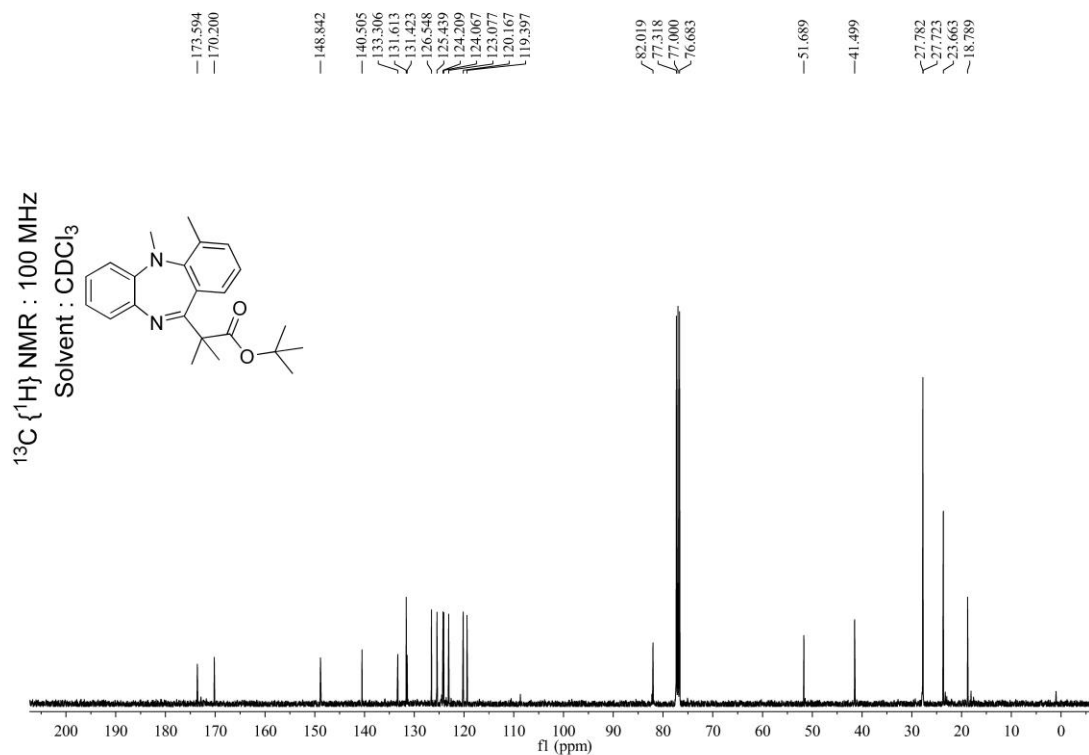

**tert-Butyl 2-(5,7-dimethyl-5H-dibenzo[b,e][1,4]diazepin-11-yl)-2-methylpropanoate(3ka)**

<sup>1</sup>H NMR : 400 MHz  
Solvent : CDCl<sub>3</sub>

7.289  
7.285  
7.268  
7.253  
7.251  
7.247  
7.230  
7.211  
7.033  
7.013  
6.992  
6.989  
6.971  
6.968  
6.962  
6.959  
6.943  
6.940  
6.924  
6.921  
6.853  
6.848  
6.833  
6.829  
6.728  
6.724

3.190  
2.276  
1.679  
1.517  
1.226  
0.072  
0.000

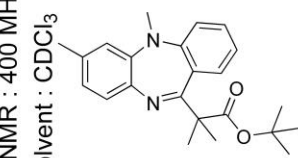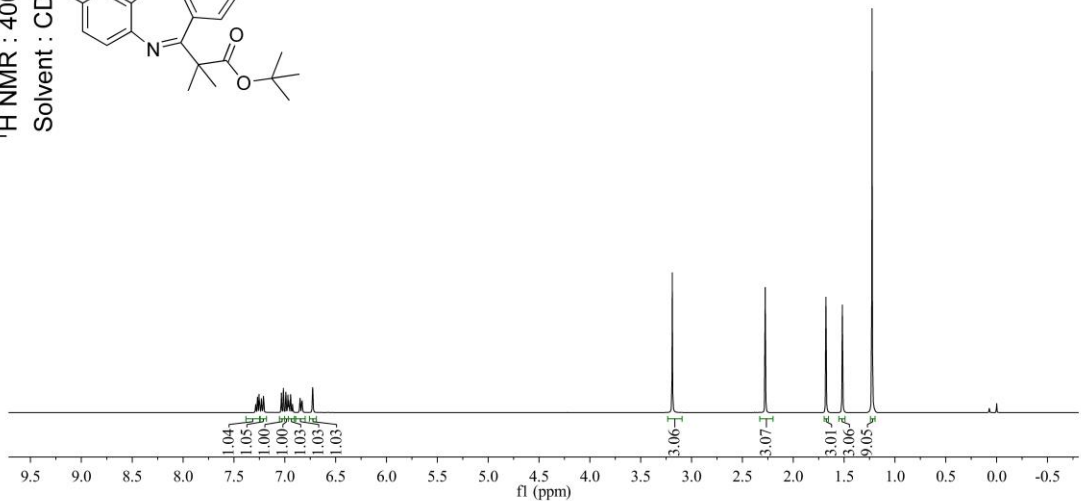

<sup>13</sup>C {<sup>1</sup>H} NMR : 100 MHz  
Solvent : CDCl<sub>3</sub>

175.364  
172.510  
157.393  
145.979  
139.866  
135.554  
130.282  
129.827  
126.551  
126.215  
124.505  
123.059  
117.687  
116.724

80.215  
77.517  
77.000  
76.683  
53.058  
36.575  
27.500  
26.525  
26.404  
21.081

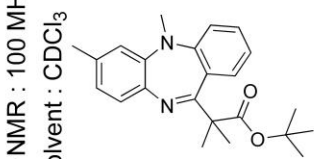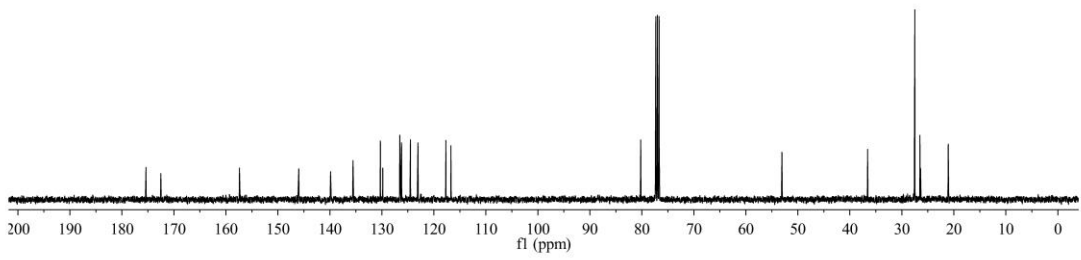

***tert*-Butyl 2-(7-chloro-5-methyl-5*H*-dibenzo[*b,e*][1,4]diazepin-11-yl)-2-methylpropanoate(31a)**

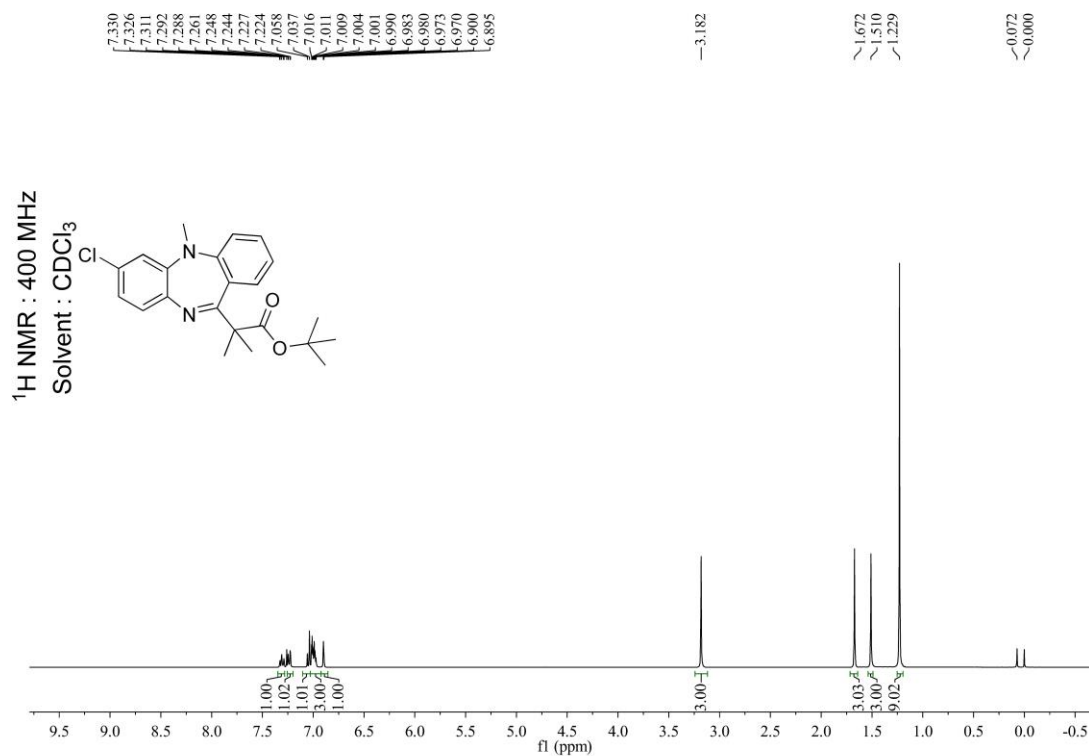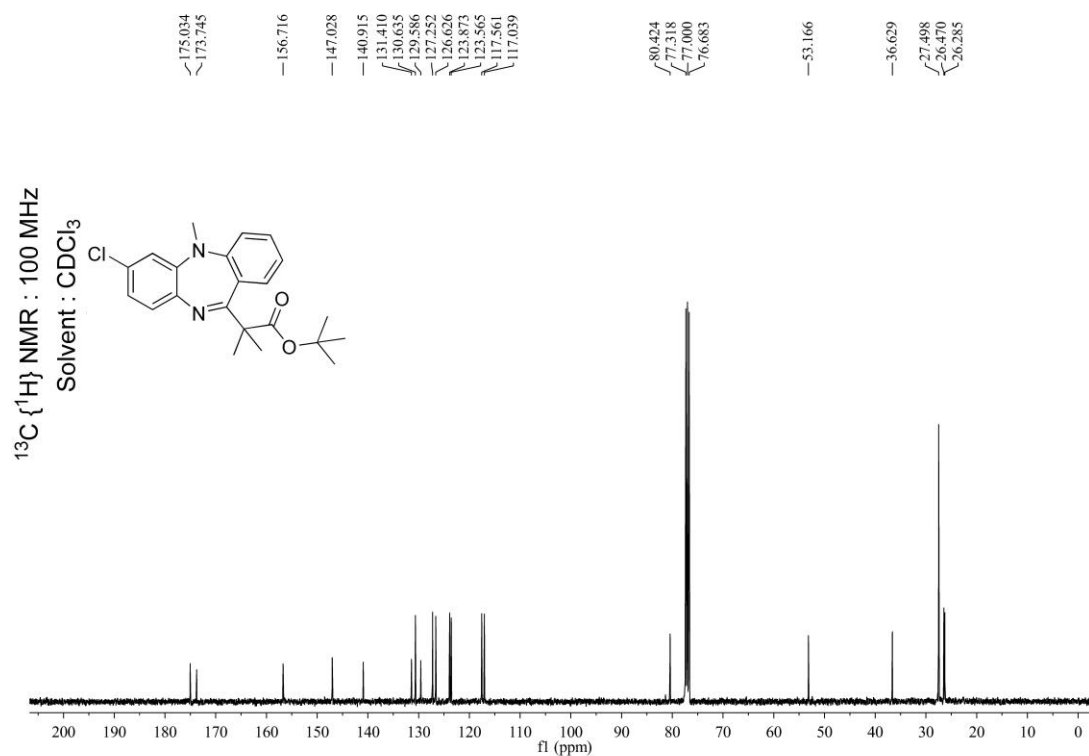

***tert*-Butyl 2-(5,8-dimethyl-5*H*-dibenzo[*b,e*][1,4]diazepin-11-yl)-2-methylpropanoate(3ma)**

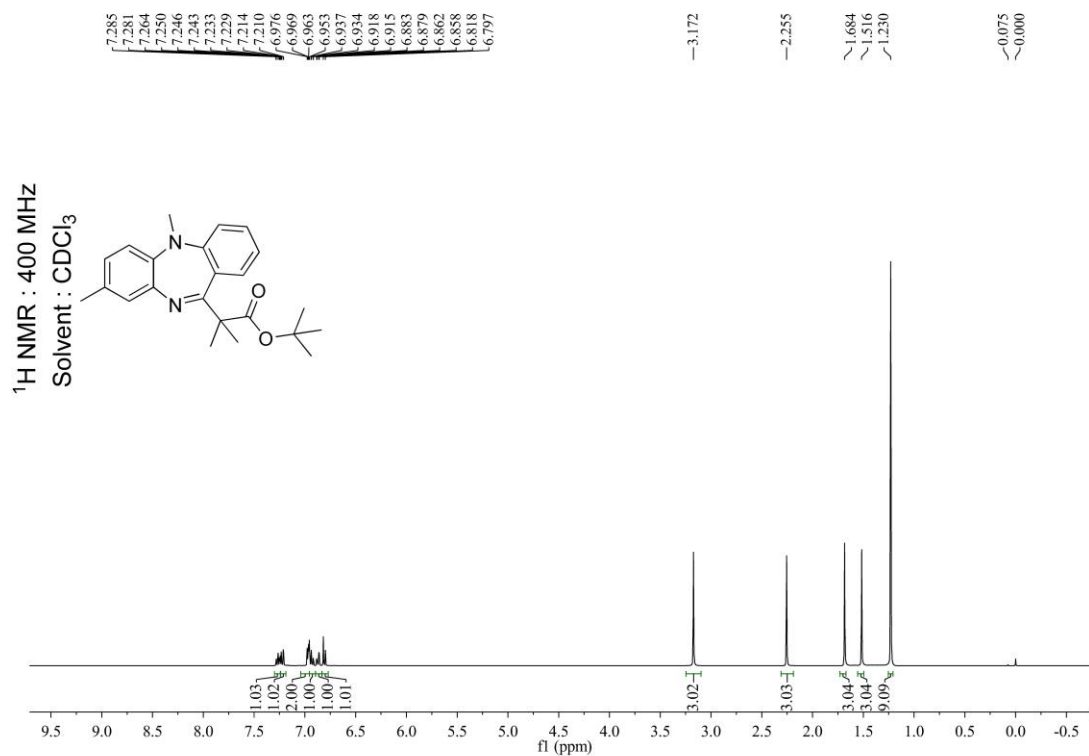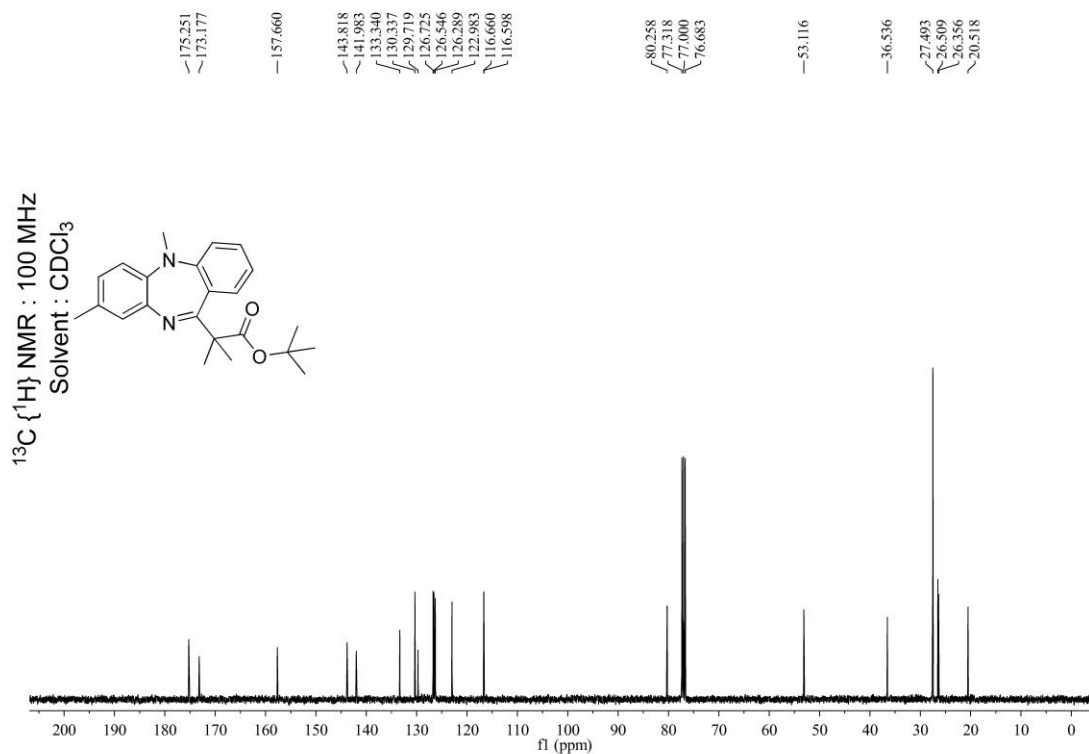

***tert*-Butyl 2-(8-methoxy-5-methyl-5*H*-dibenzo[*b,e*][1,4]diazepin-11-yl)-2-methylpropanoate(3na)**

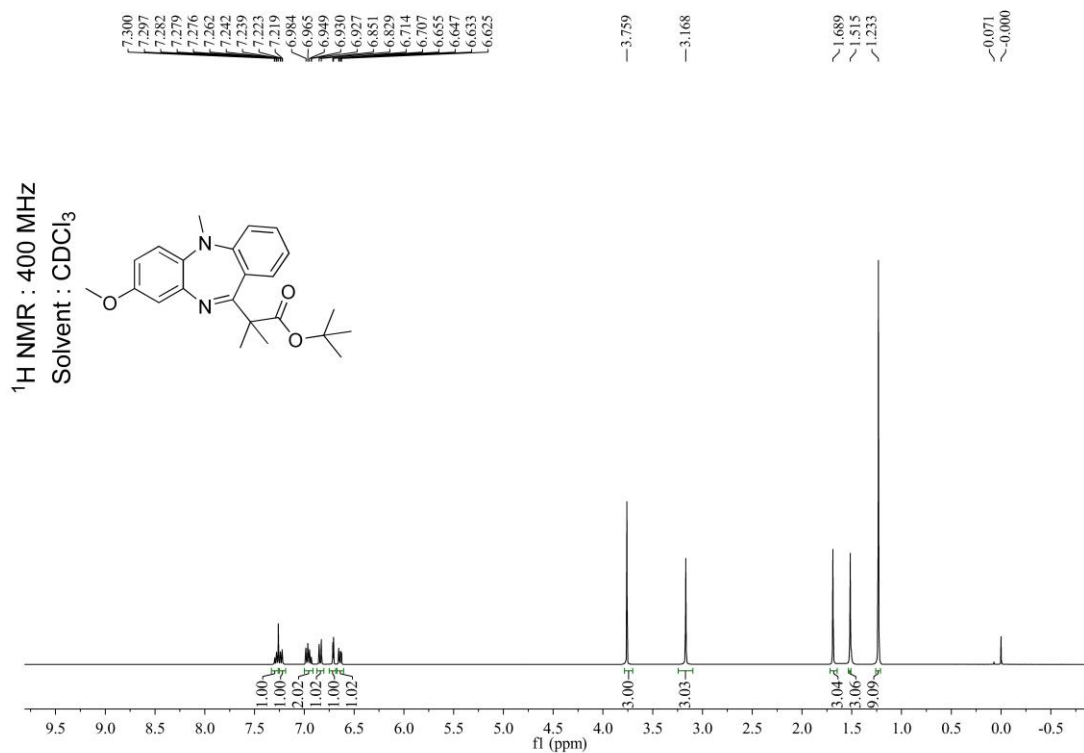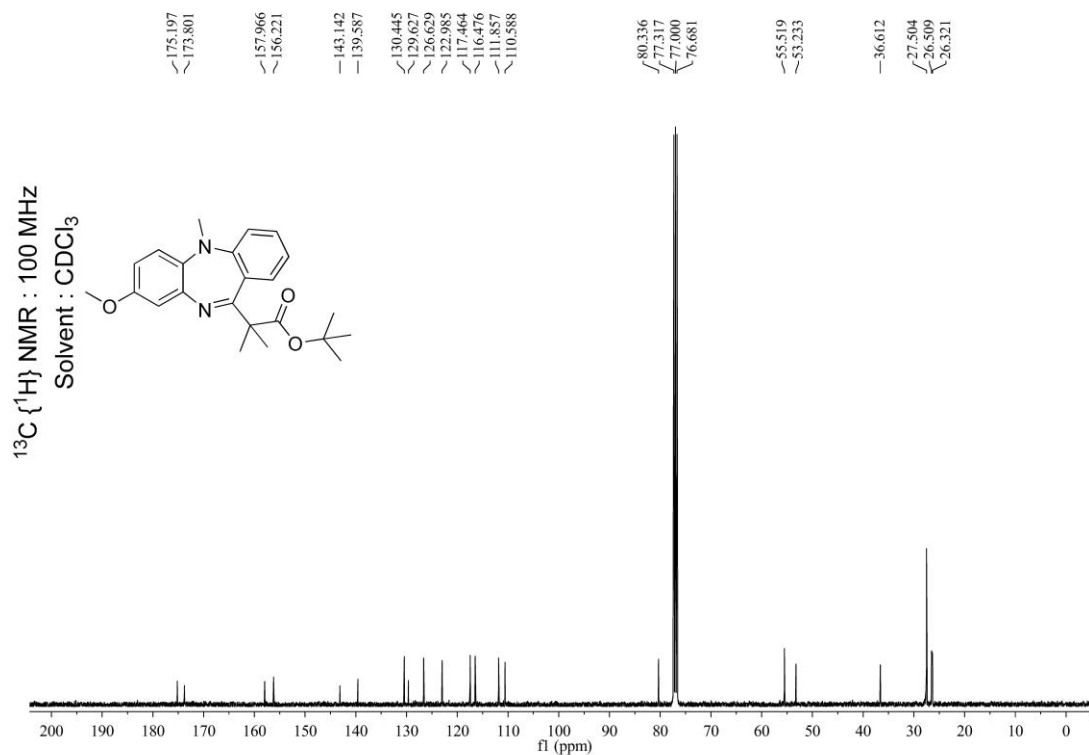

***tert*-Butyl 2-(8-chloro-5-methyl-5*H*-dibenzo[*b,e*][1,4]diazepin-11-yl)-2-methylpropanoate(30a)**

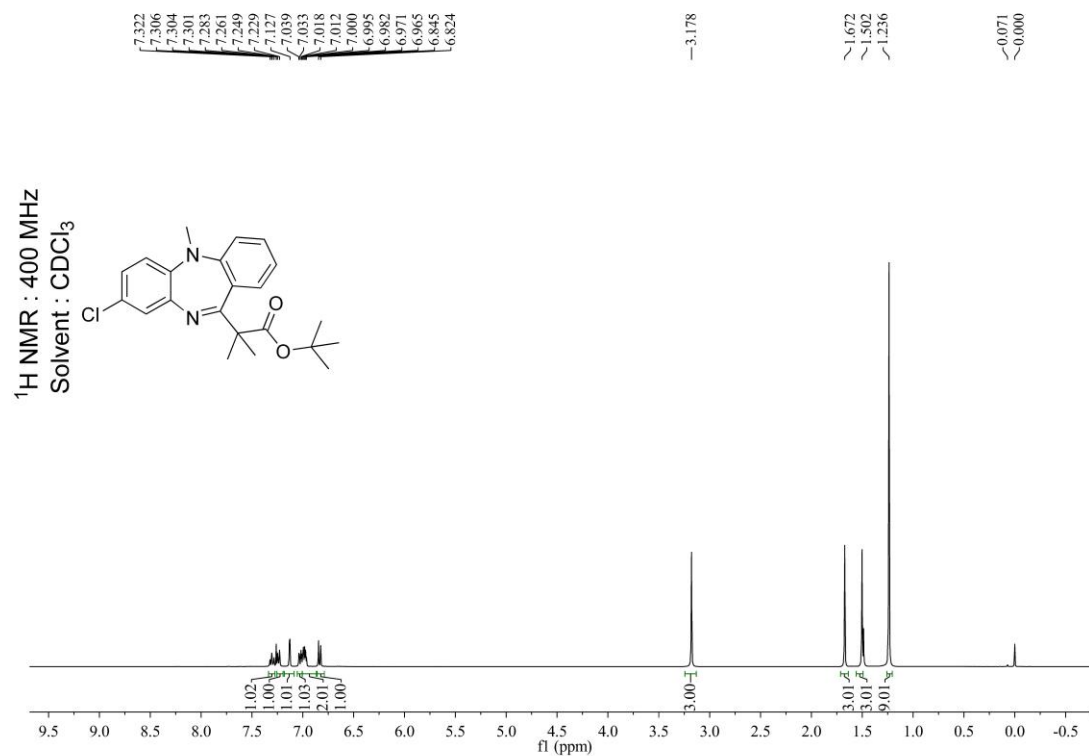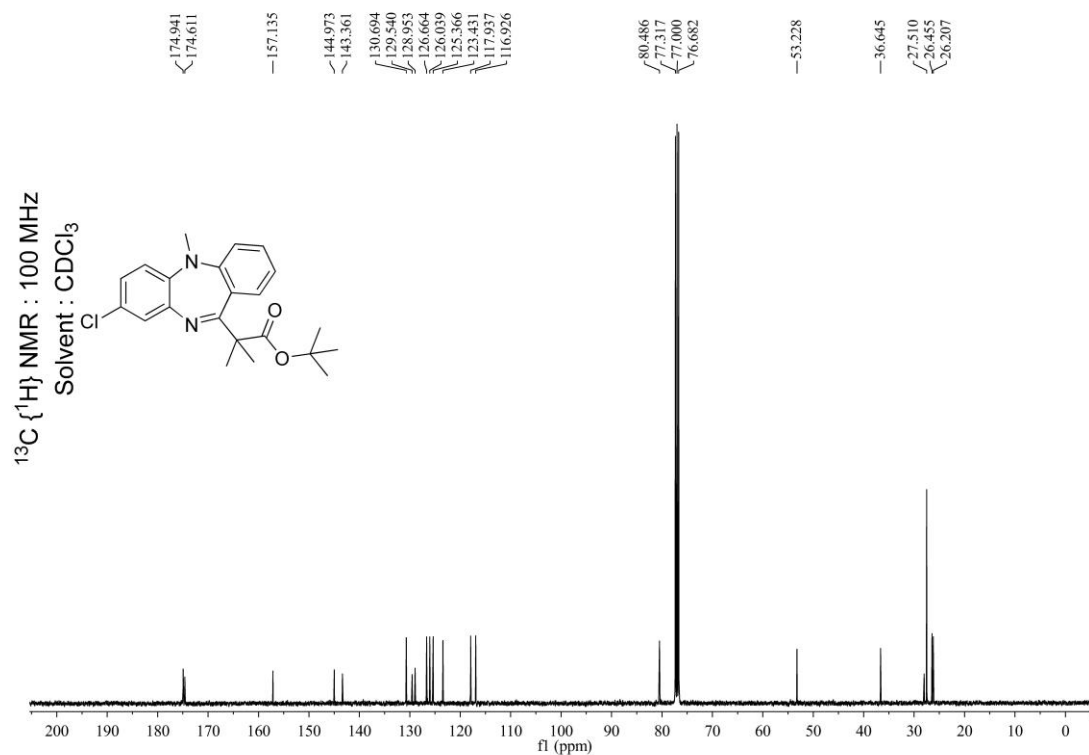



***tert*-Butyl 2-(8-bromo-5-methyl-5*H*-dibenzo[*b,e*][1,4]diazepin-11-yl)-2-methylpropanoate(3pa)**

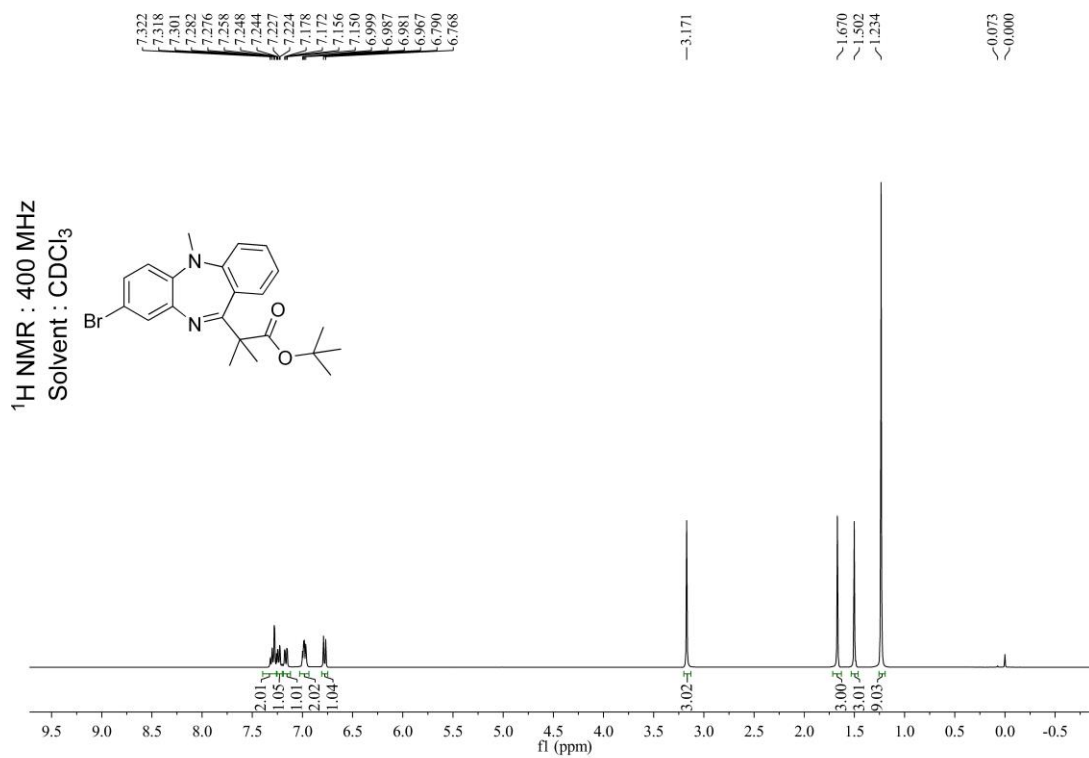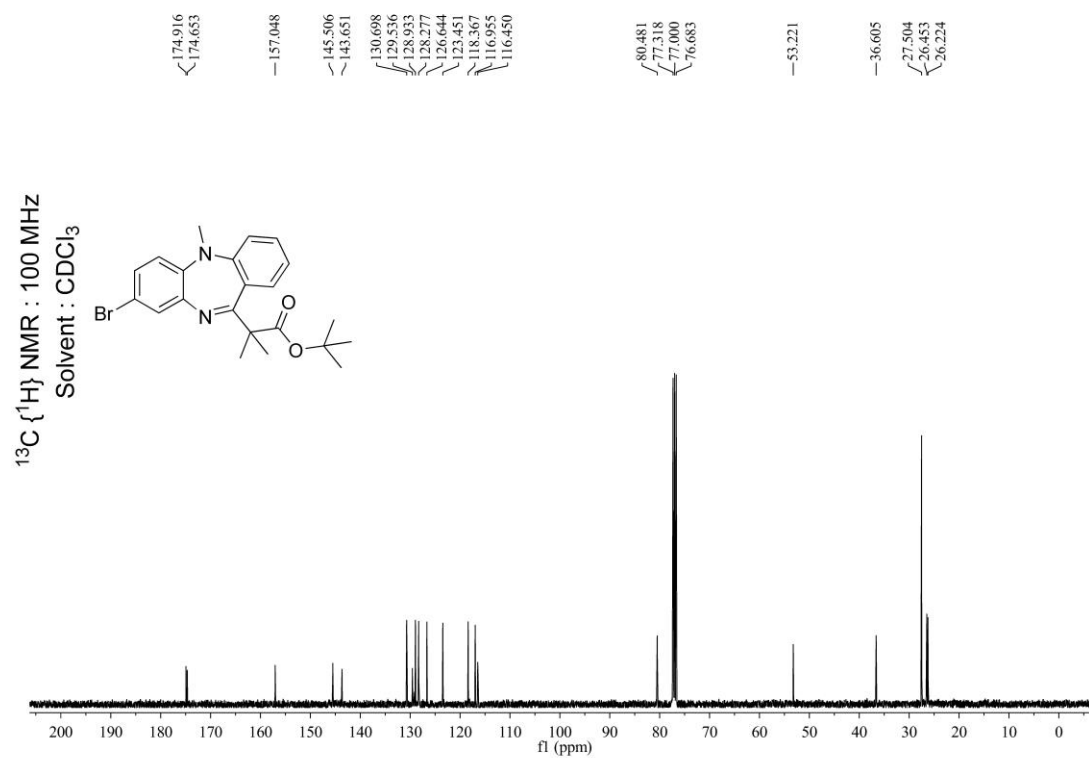

**Methyl 11-(1-(tert-butoxy)-2-methyl-1-oxopropan-2-yl)-5-methyl-5H-dibenzo[*b,e*][1,4]diazepine-8-carboxylate(3qa)**

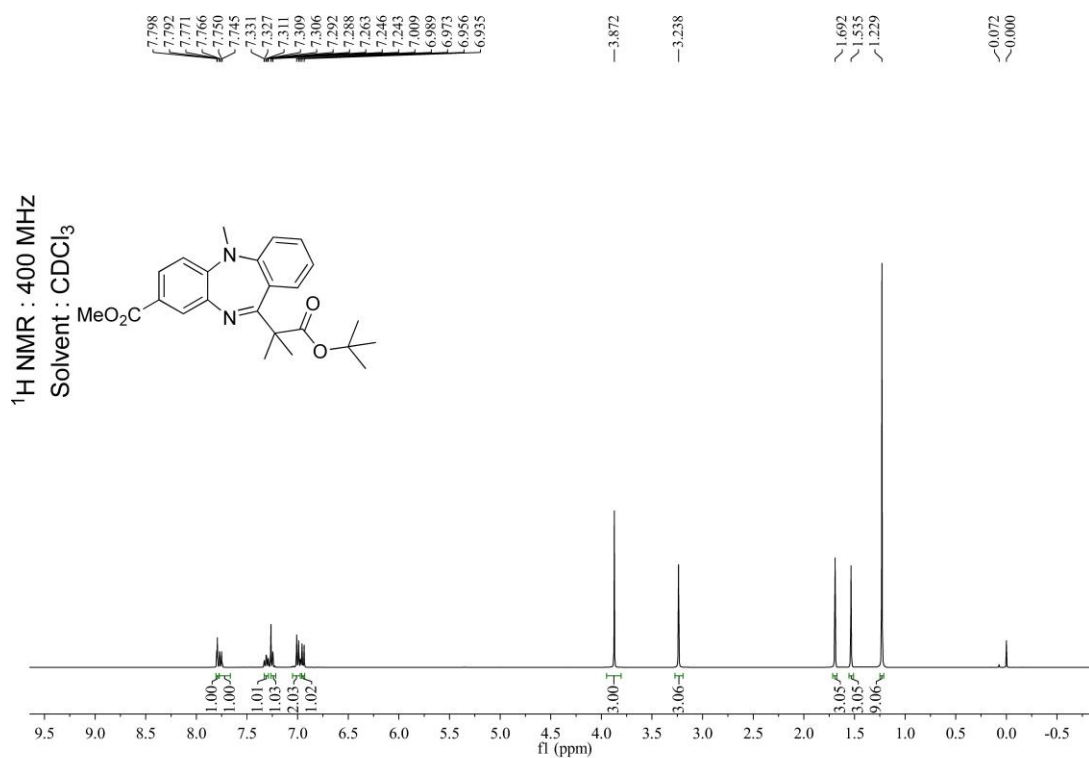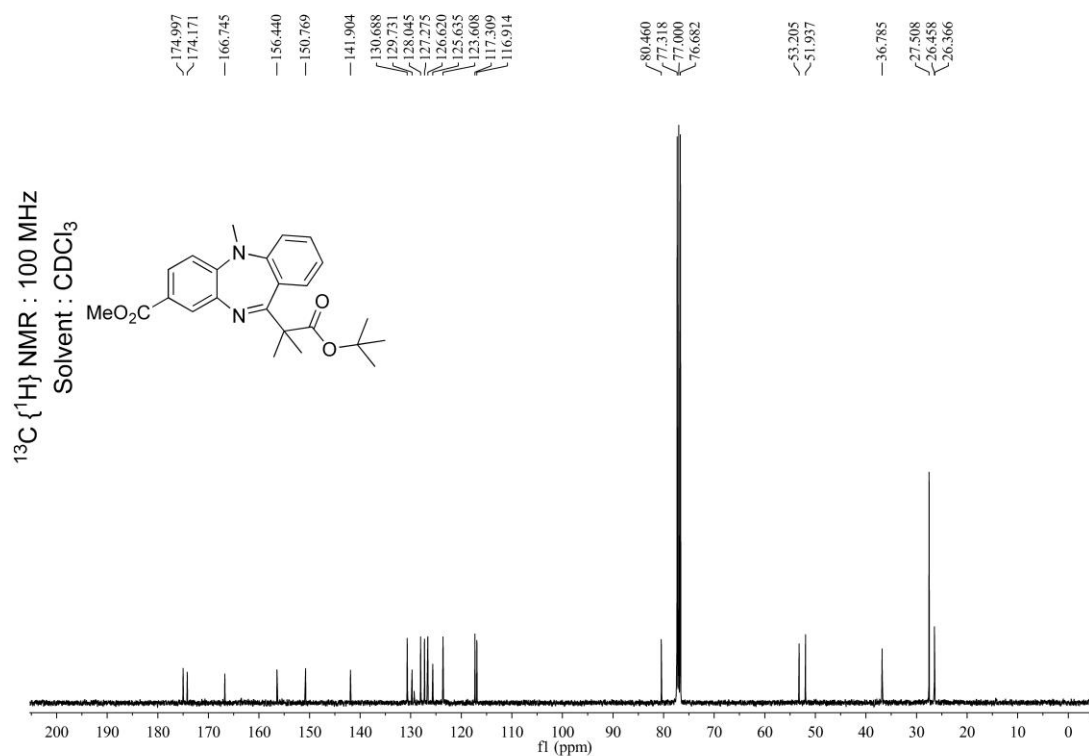

***tert*-Butyl 2-methyl-2-(5-methyl-8-(trifluoromethyl)-5*H*  
dibenzo[*b,e*][1,4]diazepin-11-yl)propanoate(3ra)**

<sup>1</sup>H NMR : 400 MHz  
Solvent : CDCl<sub>3</sub>

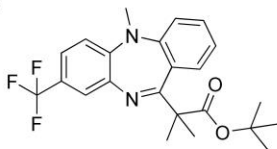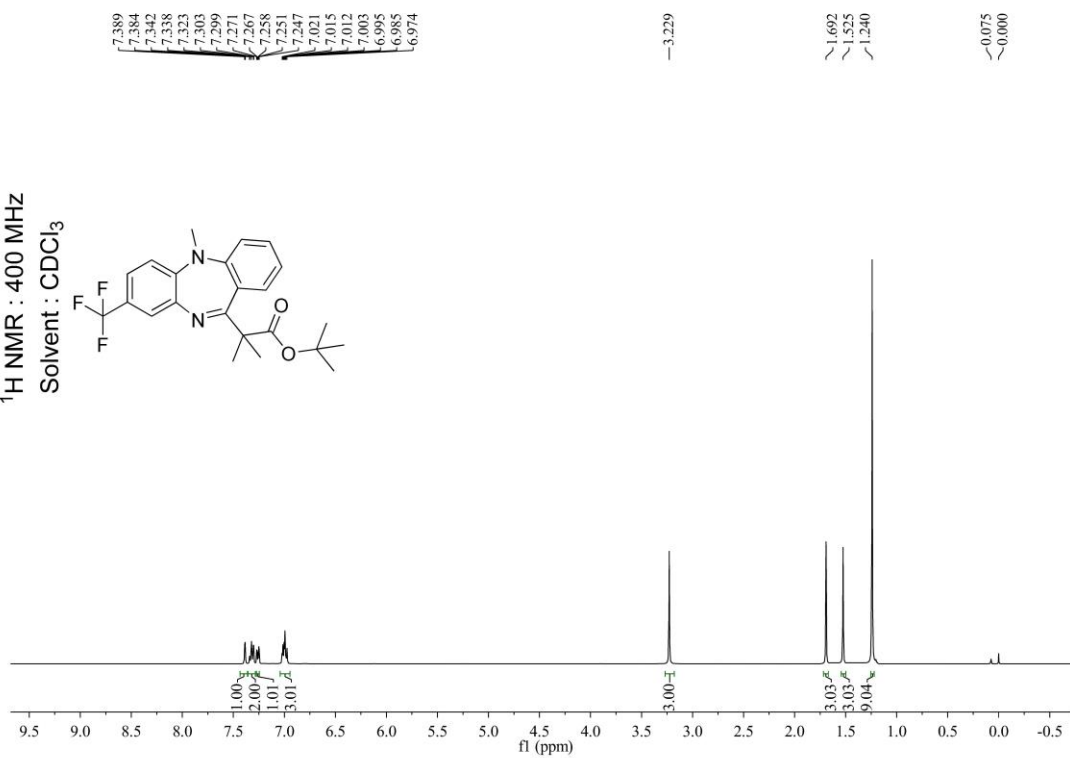

<sup>19</sup>F NMR : 282 MHz  
Solvent : CDCl<sub>3</sub>

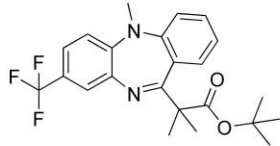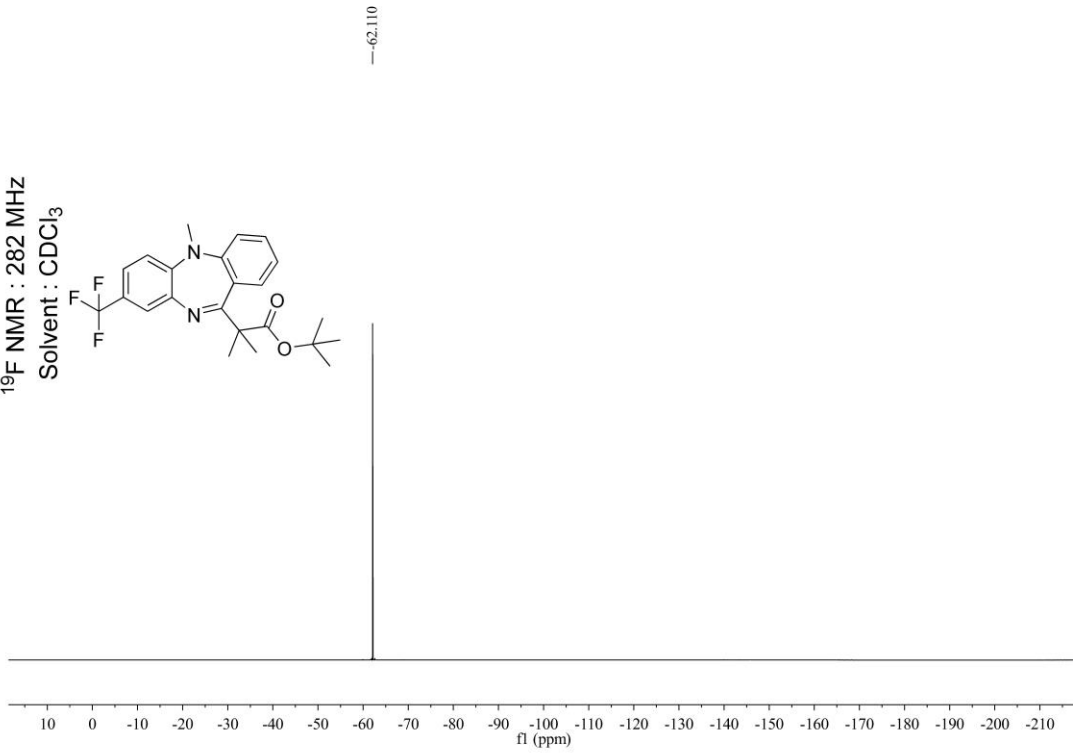

<sup>13</sup>C {<sup>1</sup>H} NMR : 100 MHz  
Solvent : CDCl<sub>3</sub>

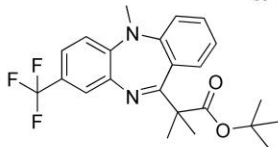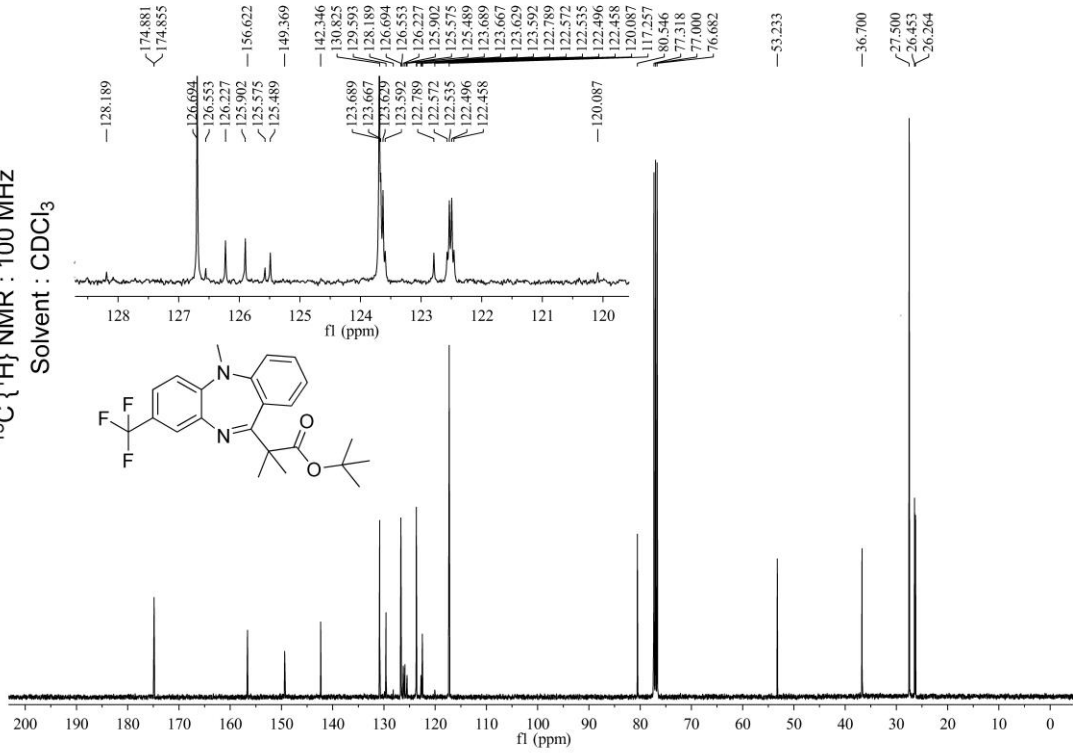

***tert*-Butyl 2-(5-ethyl-5H-dibenzo[b,e][1,4]diazepin-11-yl)-2-methylpropanoate(3sa)**

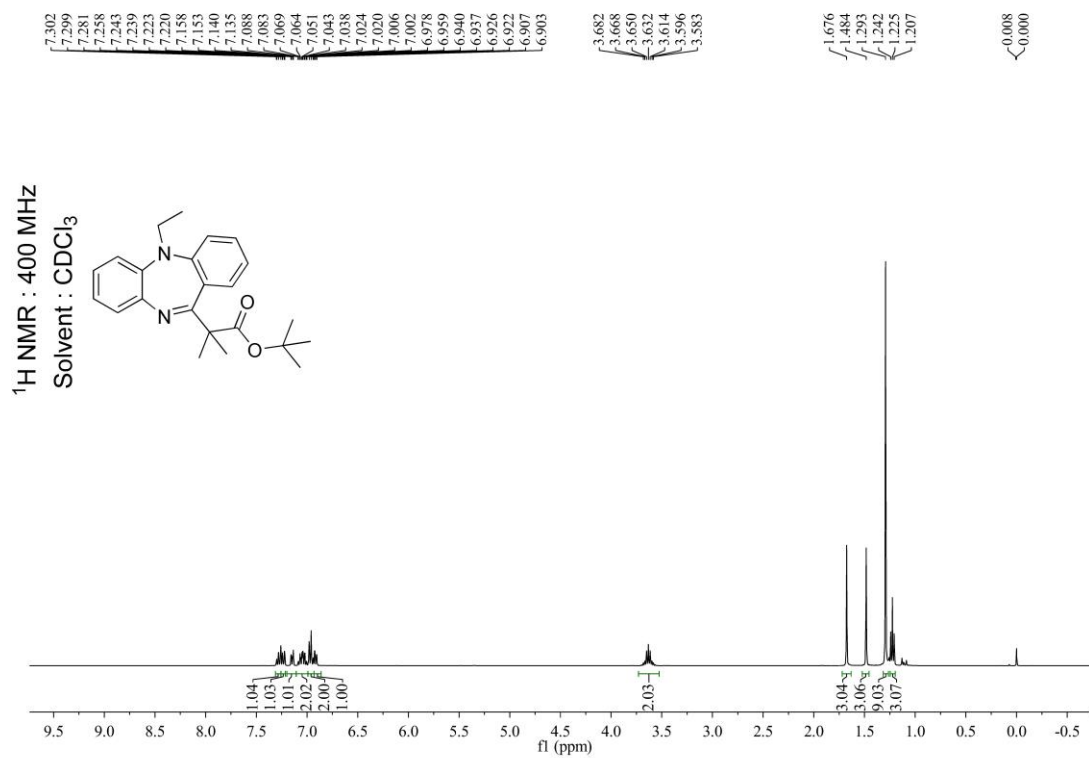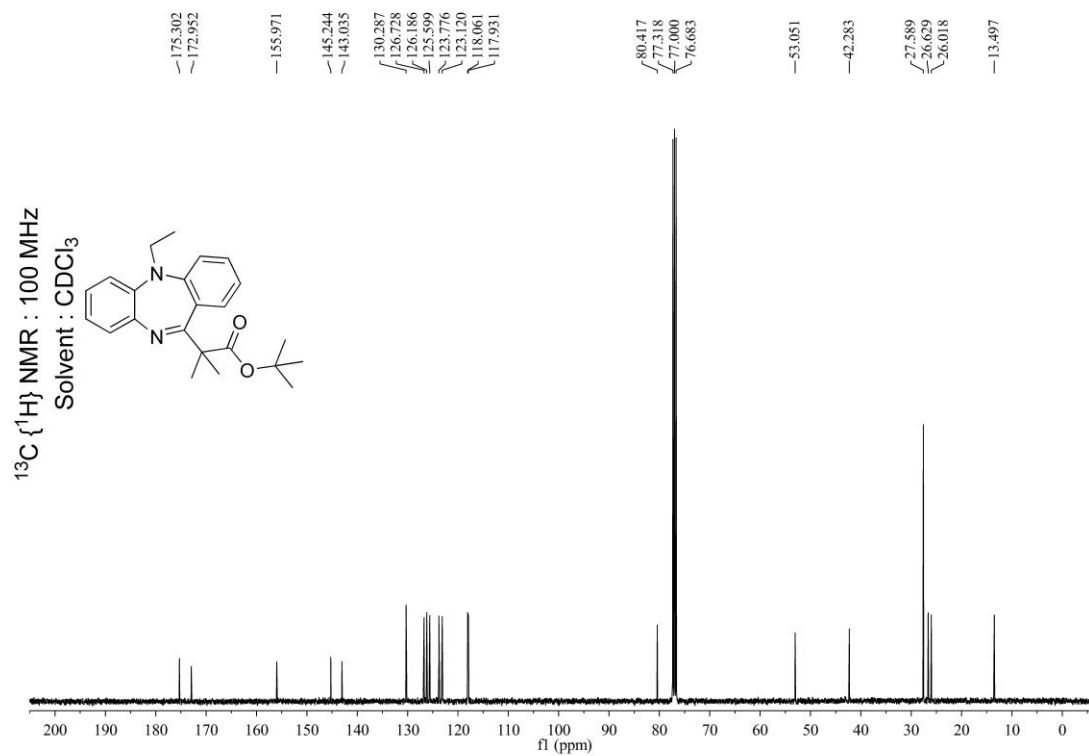

**tert-Butyl 2-(5-allyl-5H-dibenzo[b,e][1,4]diazepin-11-yl)-2-methylpropanoate(3ta)**

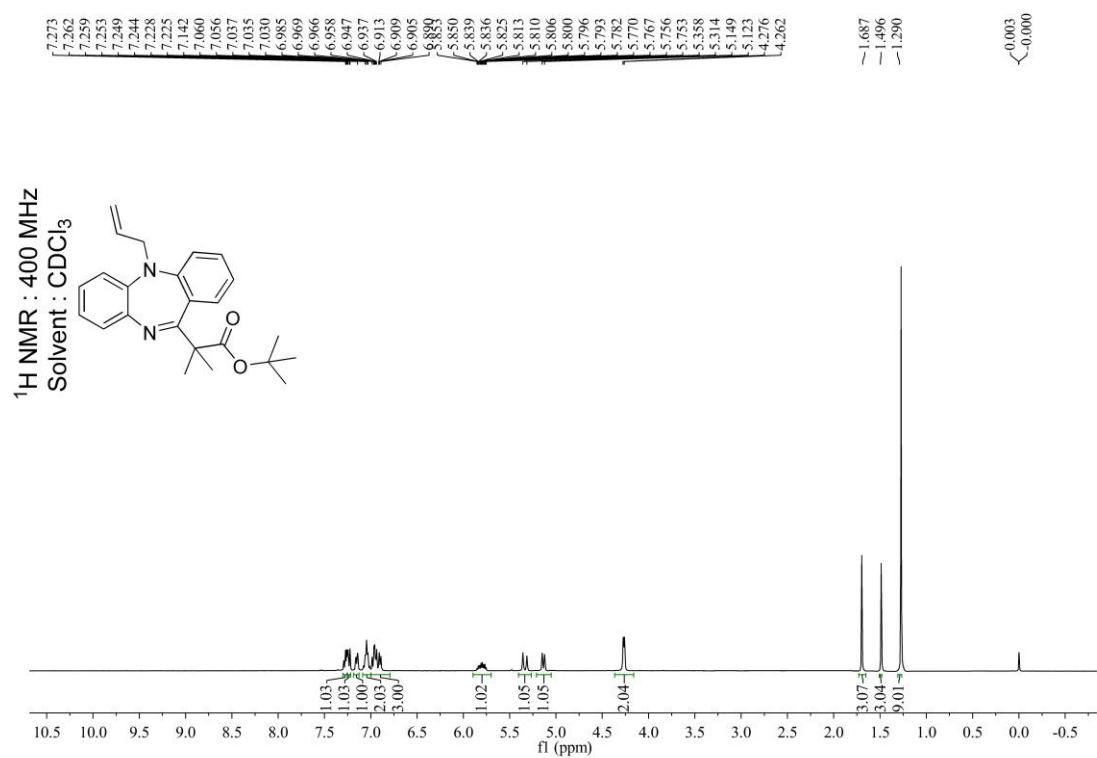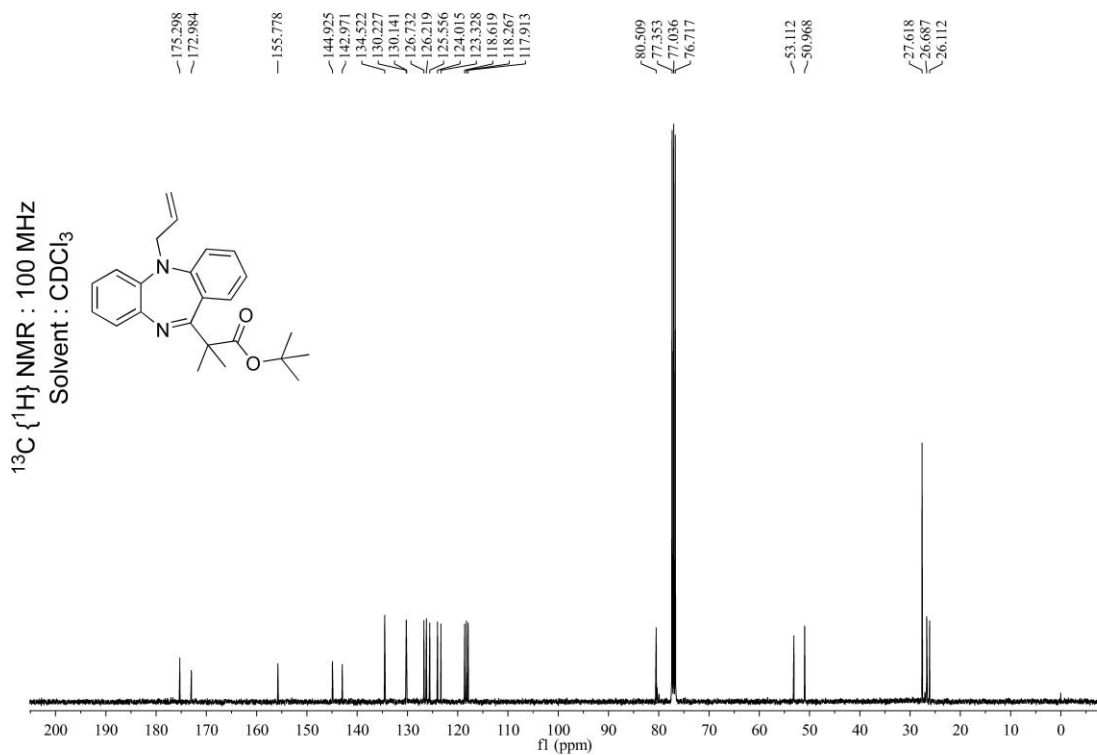

**tert-butyl 2-(5-benzyl-5H-dibenzo[b,e][1,4]diazepin-11-yl)-2-methylpropanoate(3ua)**

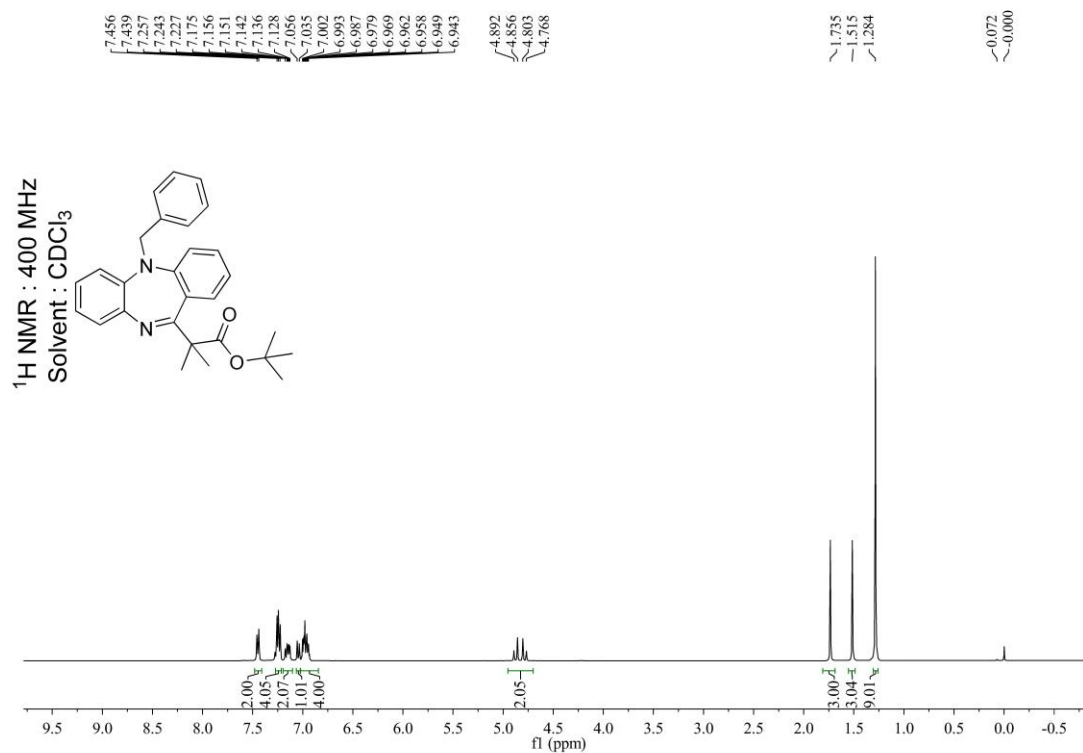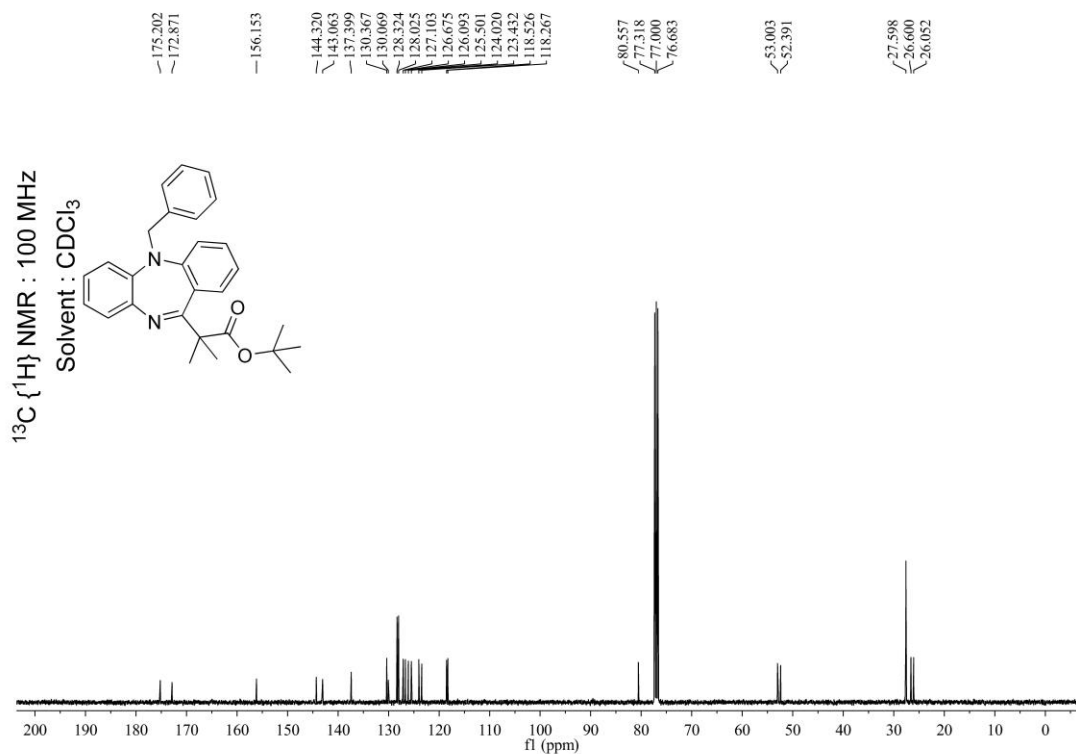

# Ethyl 2-methyl-2-(5-methyl-5H-dibenzo[b,e][1,4]diazepin-11-yl)propanoate (3ab)

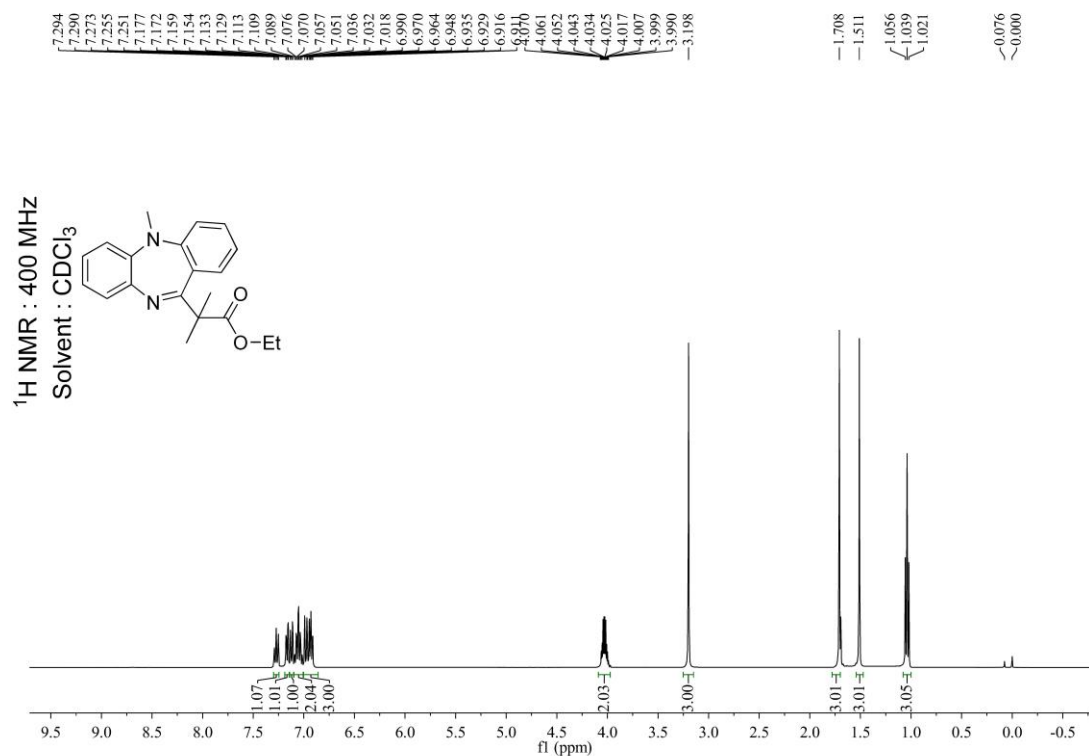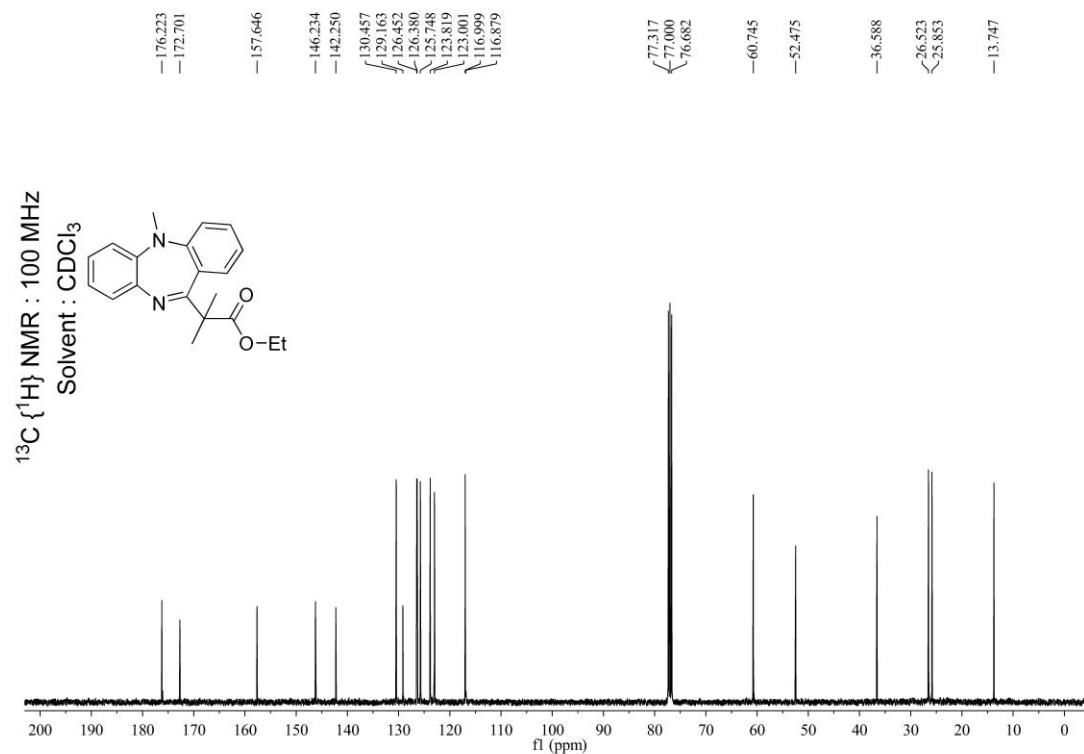



# Ethyl 2,2-difluoro-2-(5-methyl-5H-dibenzo[b,e][1,4]diazepin-11-yl)acetate(3ac)

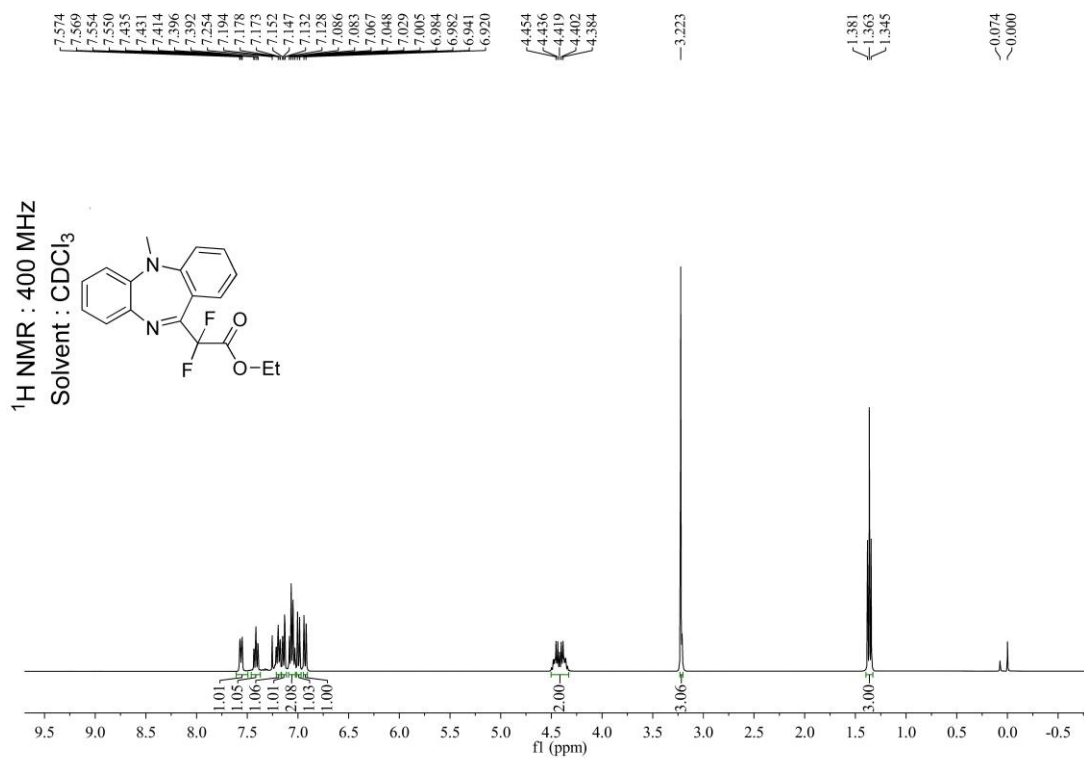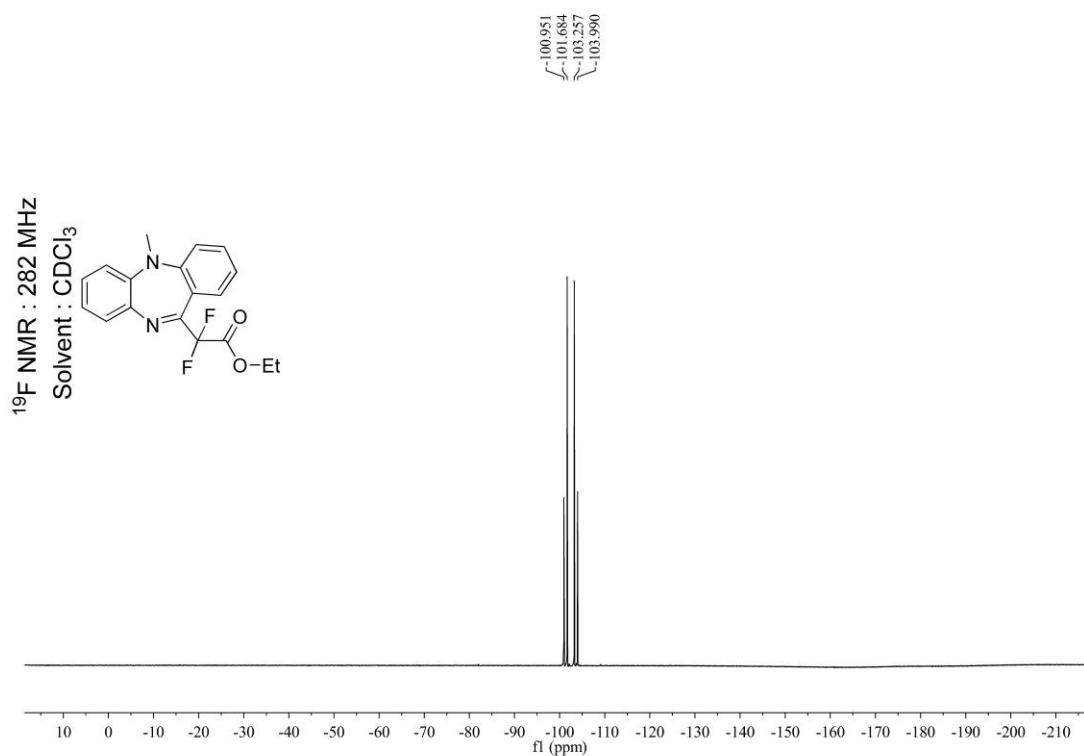

$^{13}\text{C}$  { $^1\text{H}$ } NMR : 100 MHz

Solvent :  $\text{CDCl}_3$

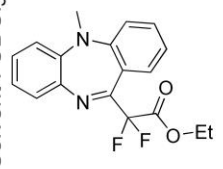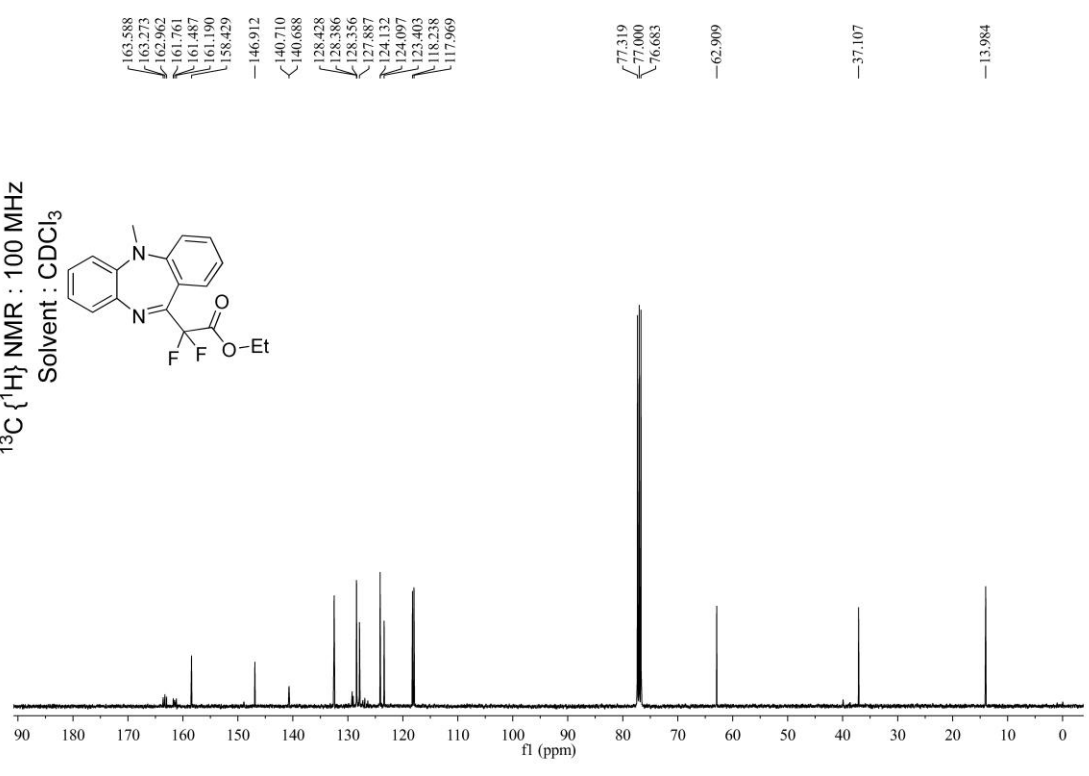

# Diethyl 2-methyl-2-(5-methyl-5H-dibenzo[b,e][1,4]diazepin-11-yl)malonate(3ad)

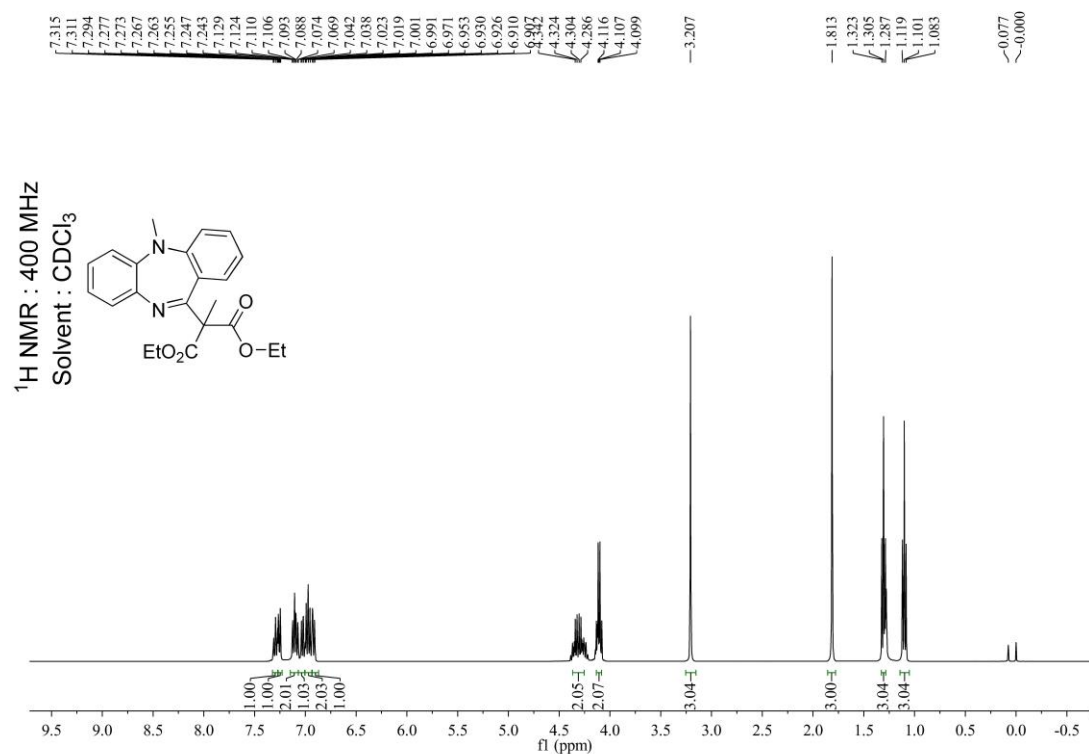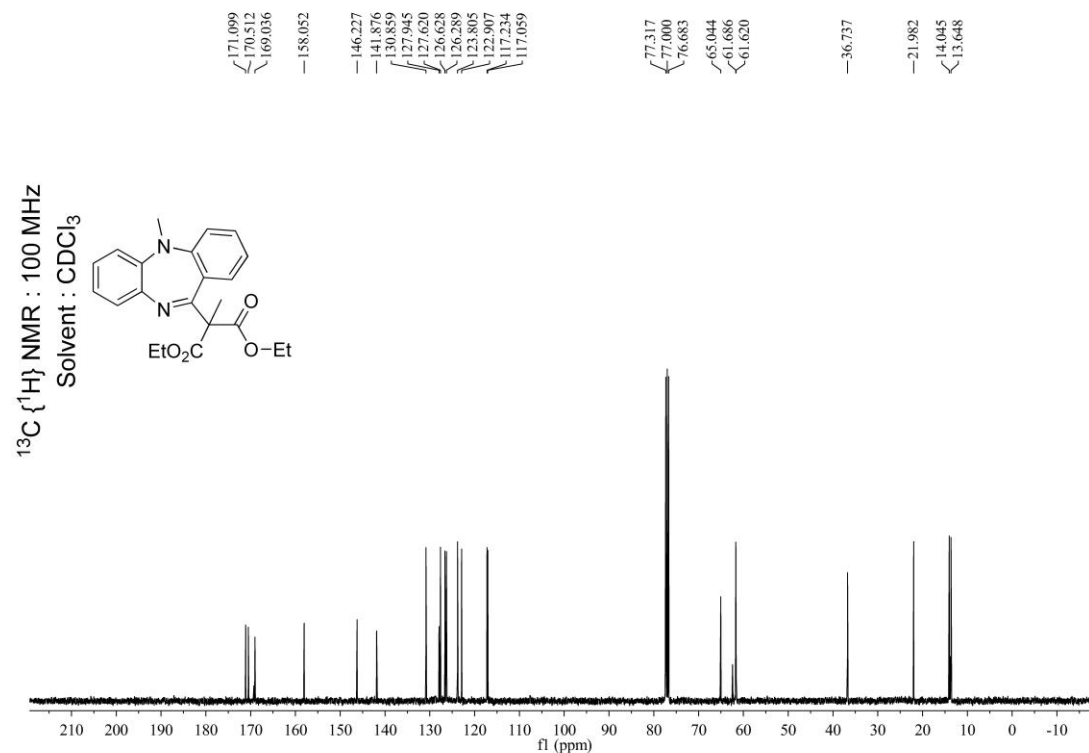

**2-methyl-2-(5-methyl-5H-dibenzo[b,e][1,4]diazepin-11-yl)-1-phenylpropan-1-one**  
**(3ae)**

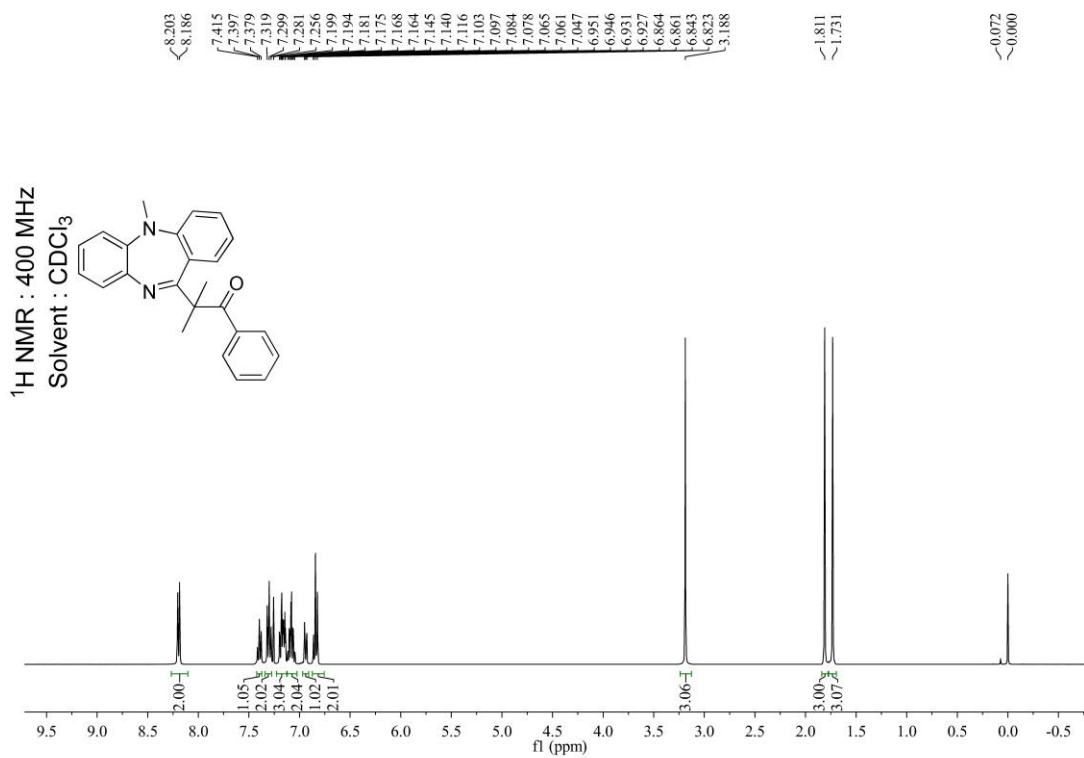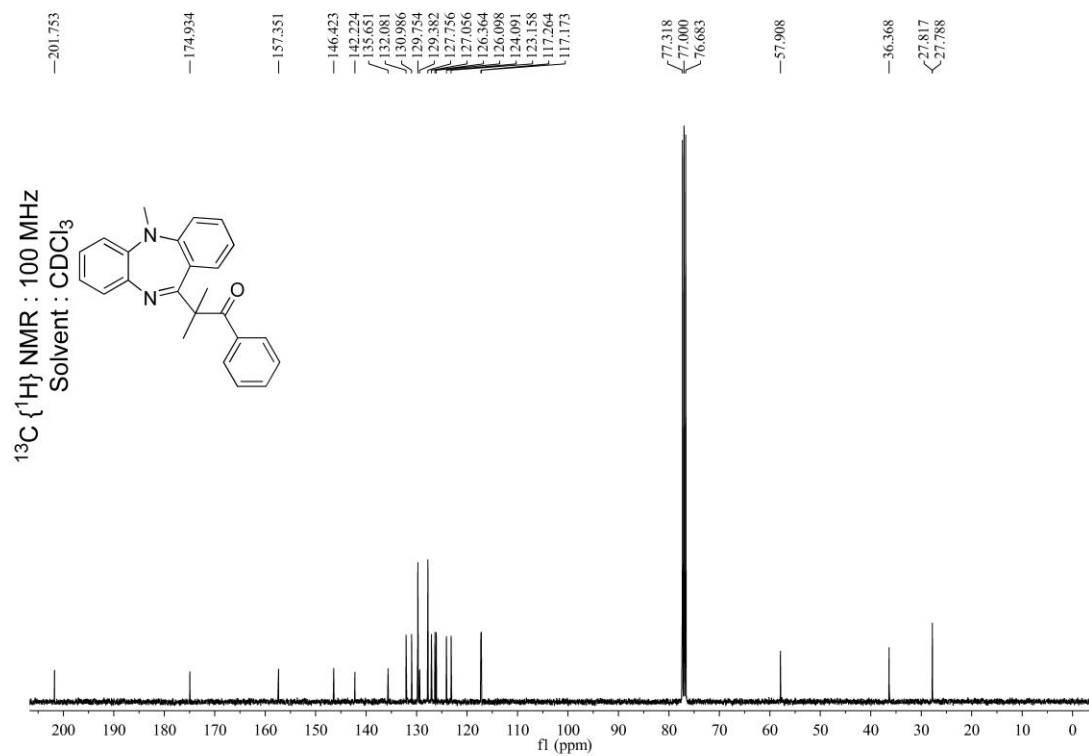

**Methyl 1-(5-methyl-5H-dibenzo[b,e][1,4]diazepin-11-yl)cyclopropane-1-carboxylate(3af)**

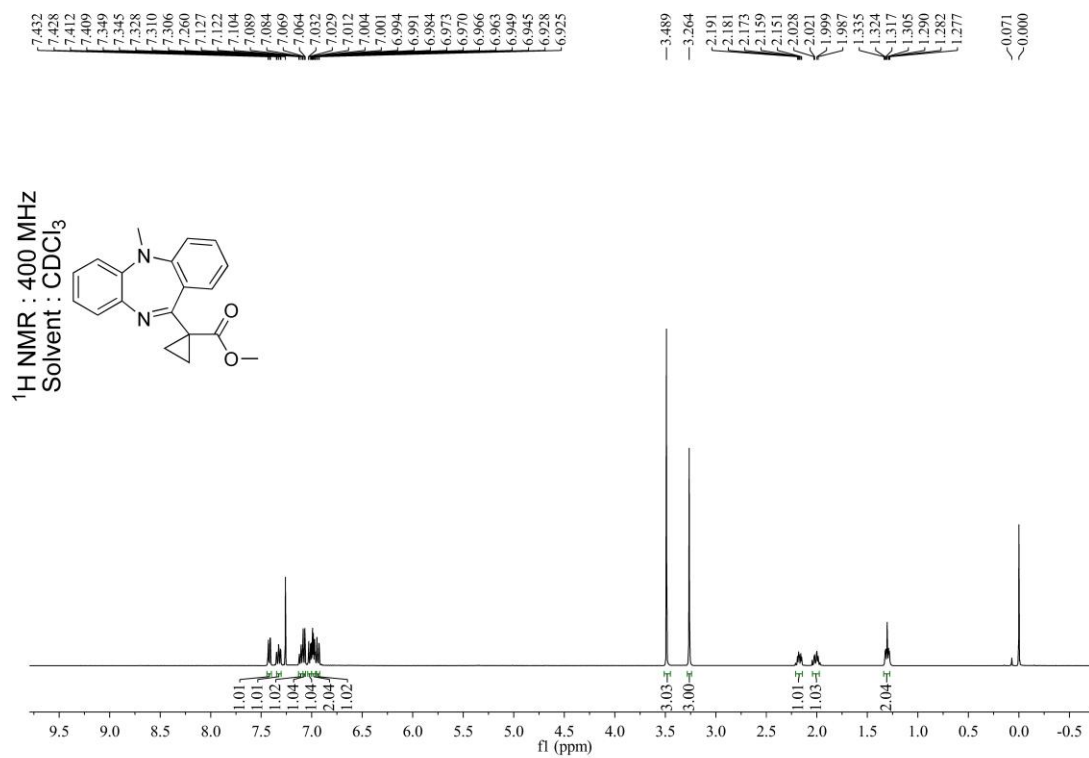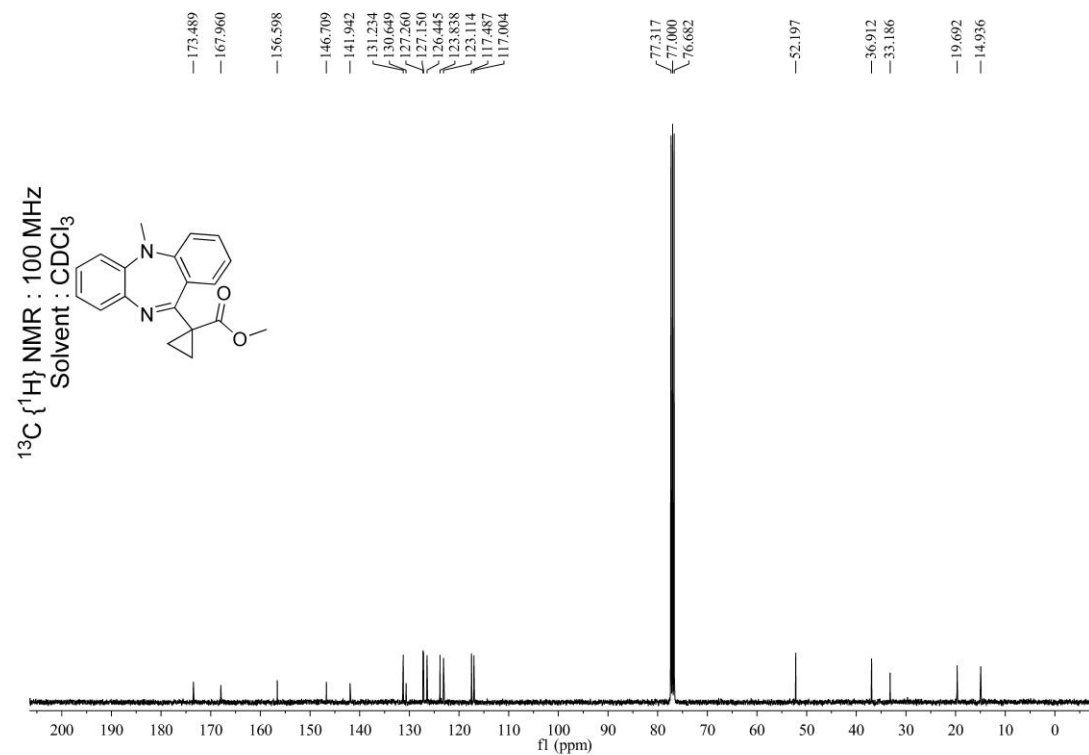

**Ethyl 1-(5-methyl-5H-dibenzo[b,e][1,4]diazepin-11-yl)cyclobutane-1-carboxylate(3ag)**

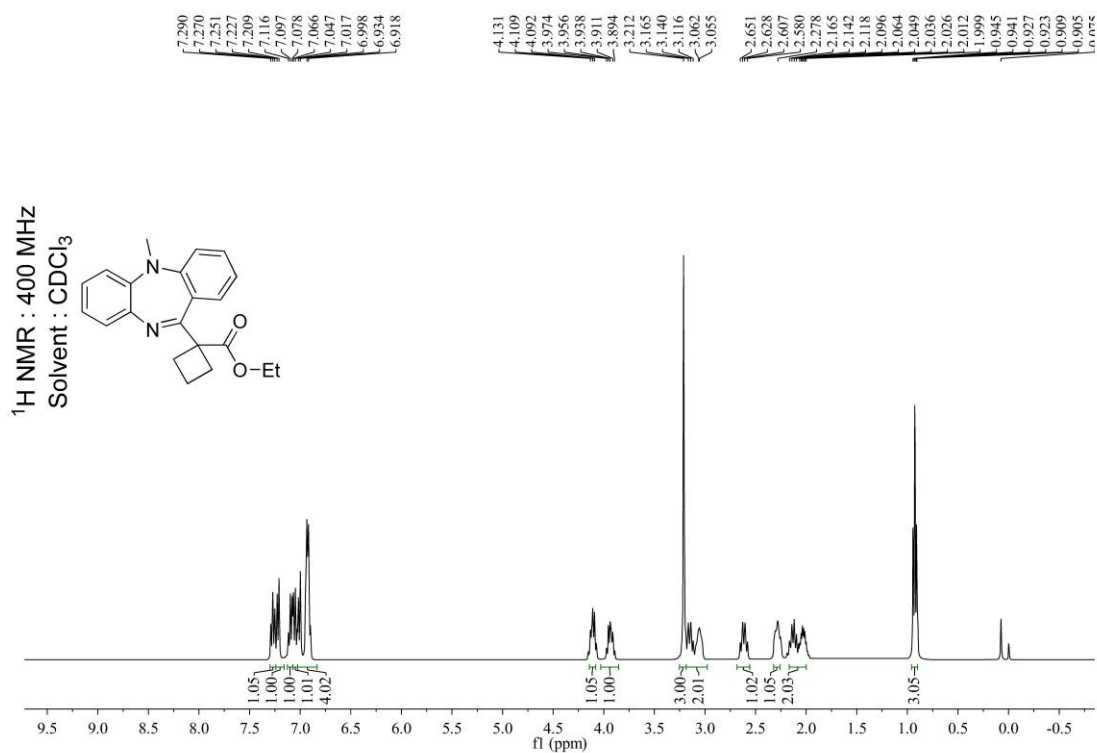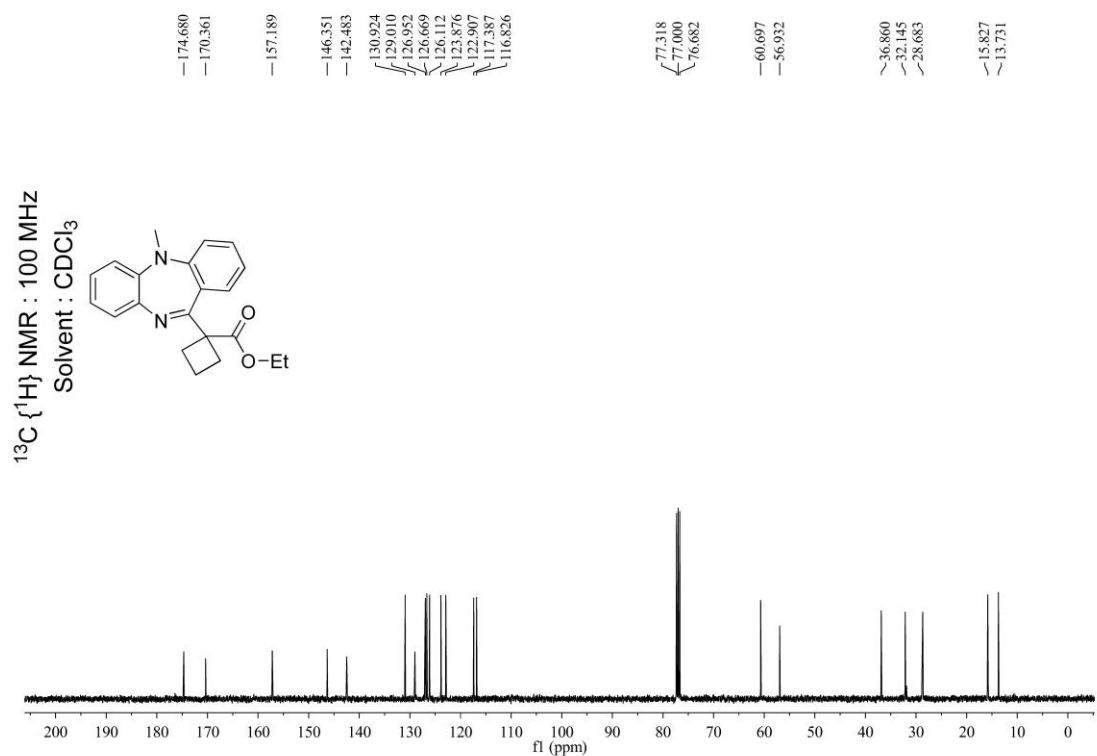

## 2-(5-methyl-5H-dibenzo[b,e][1,4]diazepin-11-yl)-1-phenylpropan-1-one (4ah)

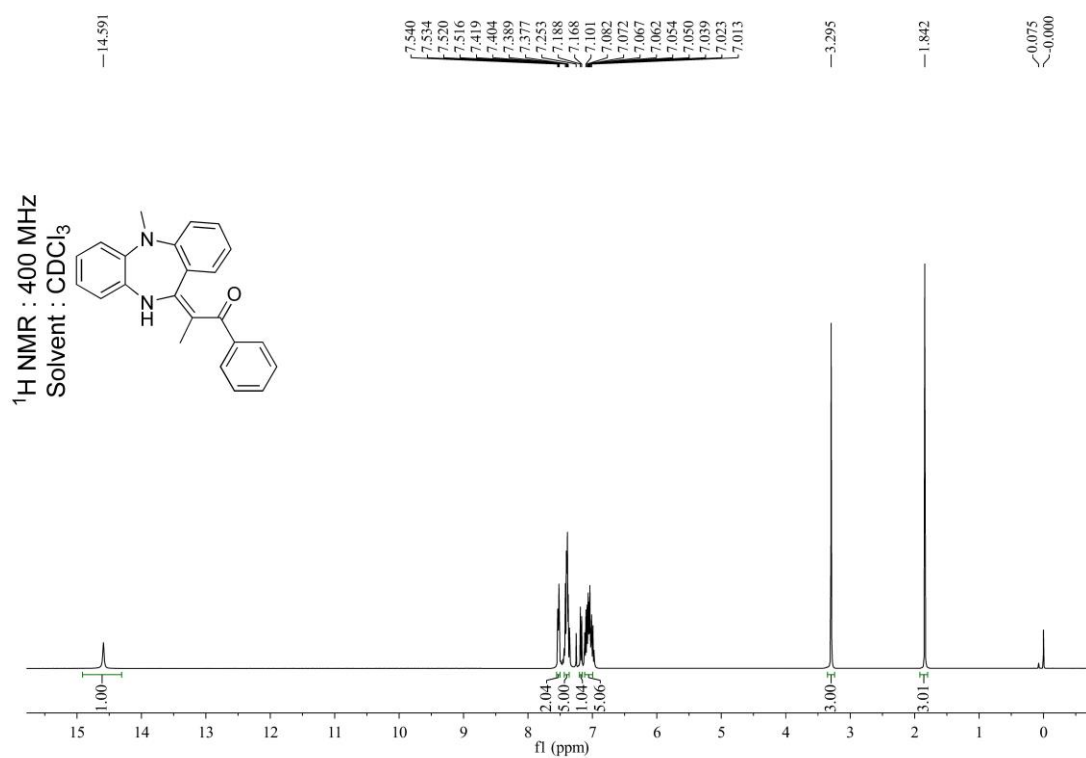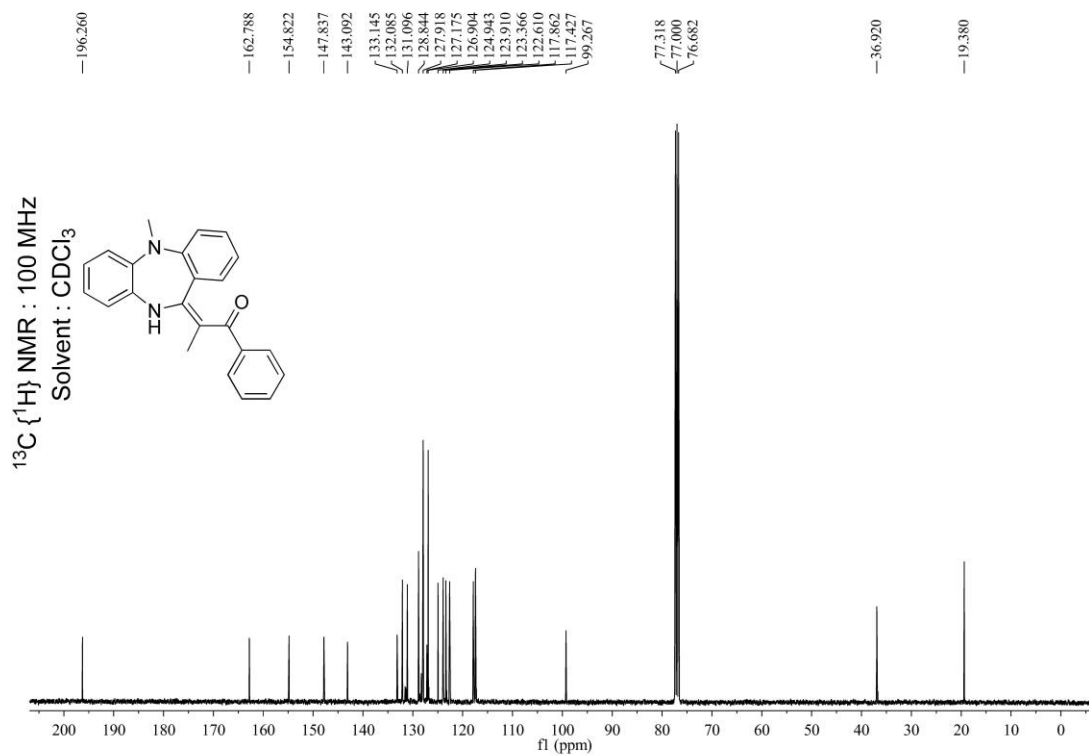

**(E)-3-(5-methyl-5,10-dihydro-11H-dibenzo[*b,e*][1,4]diazepin-11-ylidene)dihydrofuran-2(3H)-one (4ai)**

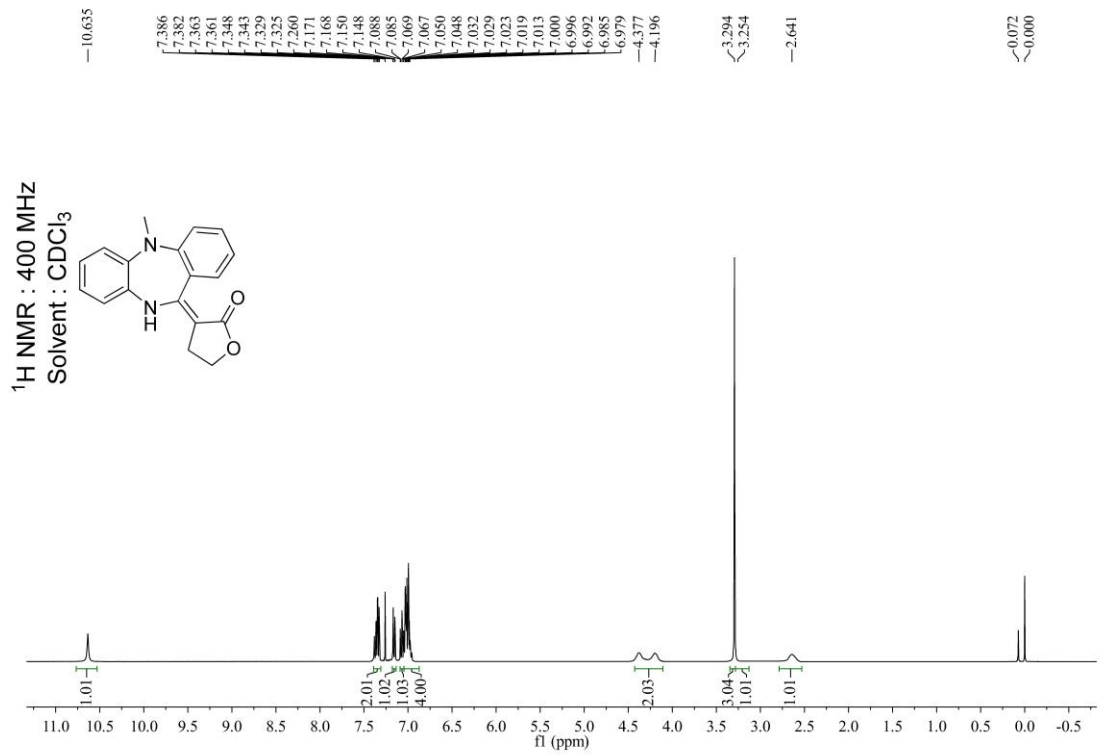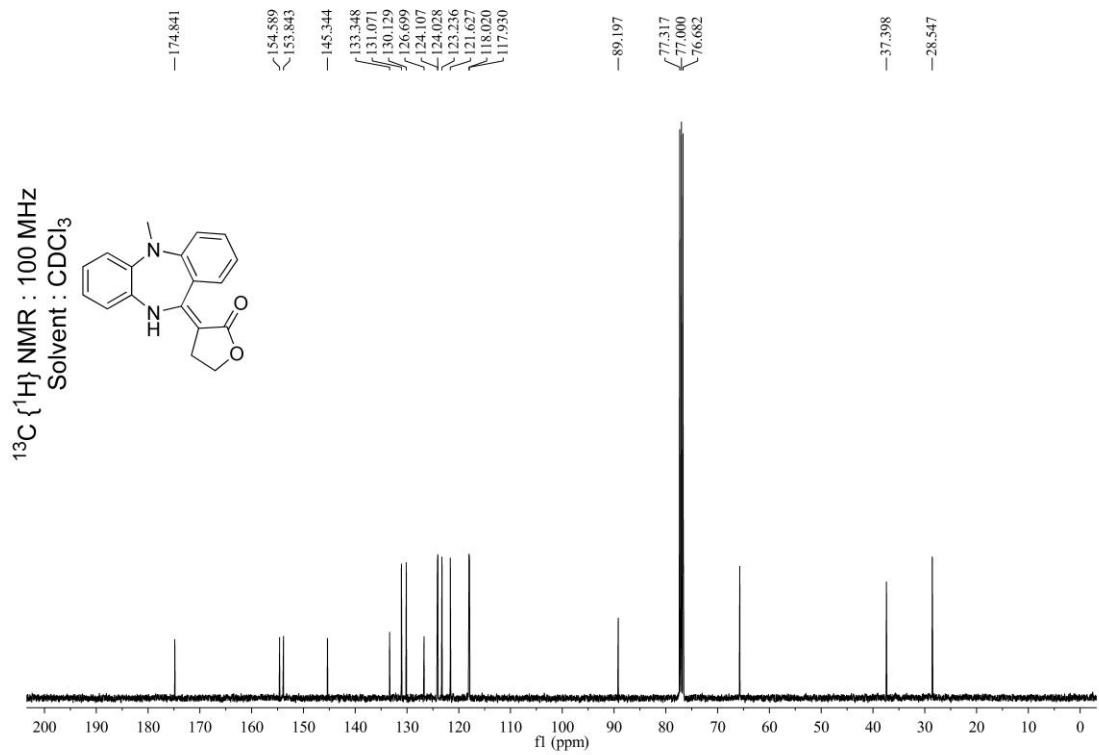



**(E)-1-(5-methyl-5,10-dihydro-11H-dibenzo[b,e][1,4]diazepin-11-ylidene)propan-2-one(4aj)**

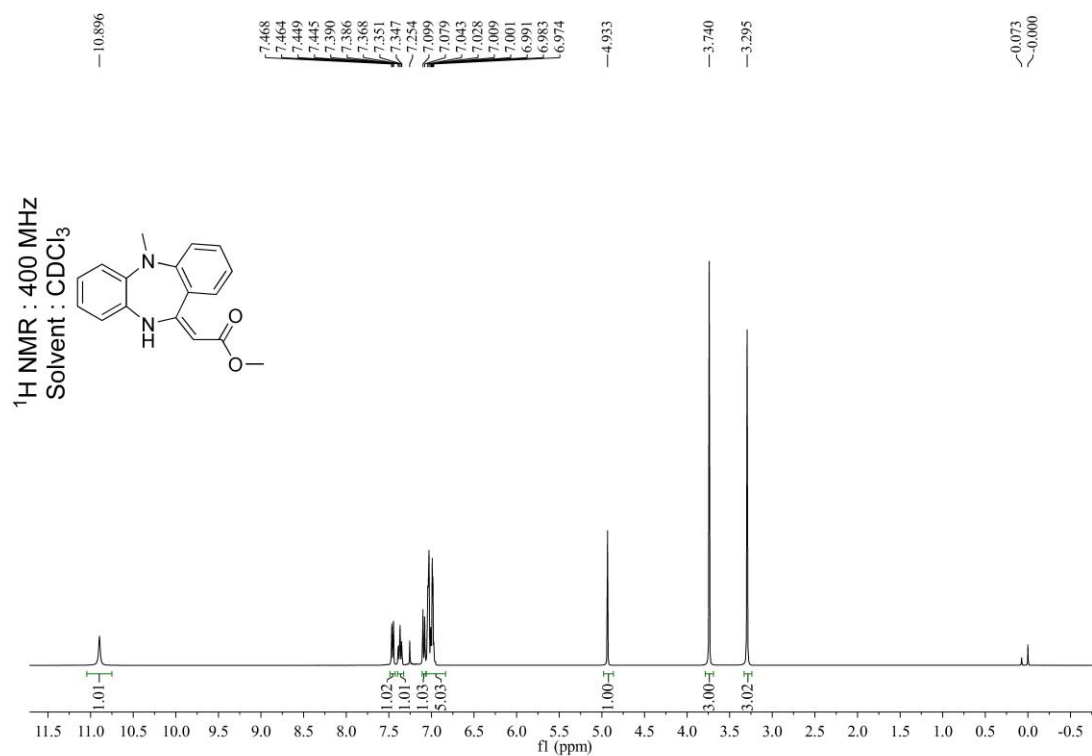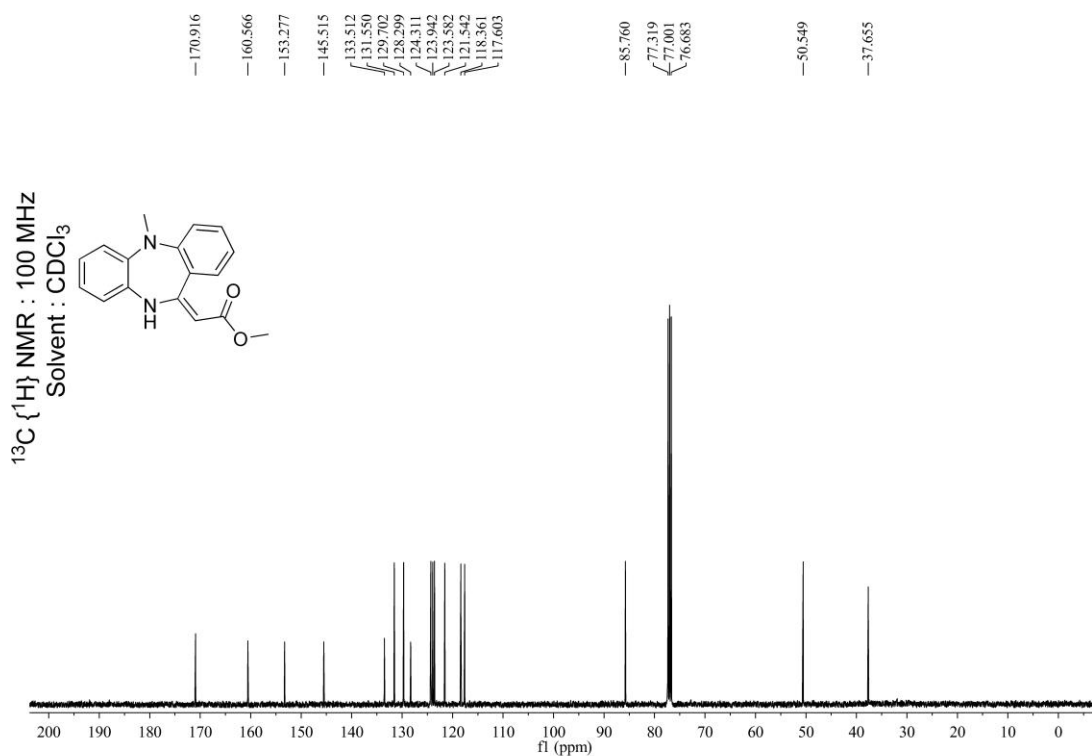

**(E)-1-(5-methyl-5,10-dihydro-11H-dibenzo[b,e][1,4]diazepin-11-ylidene)butan-2-one(4ak)**

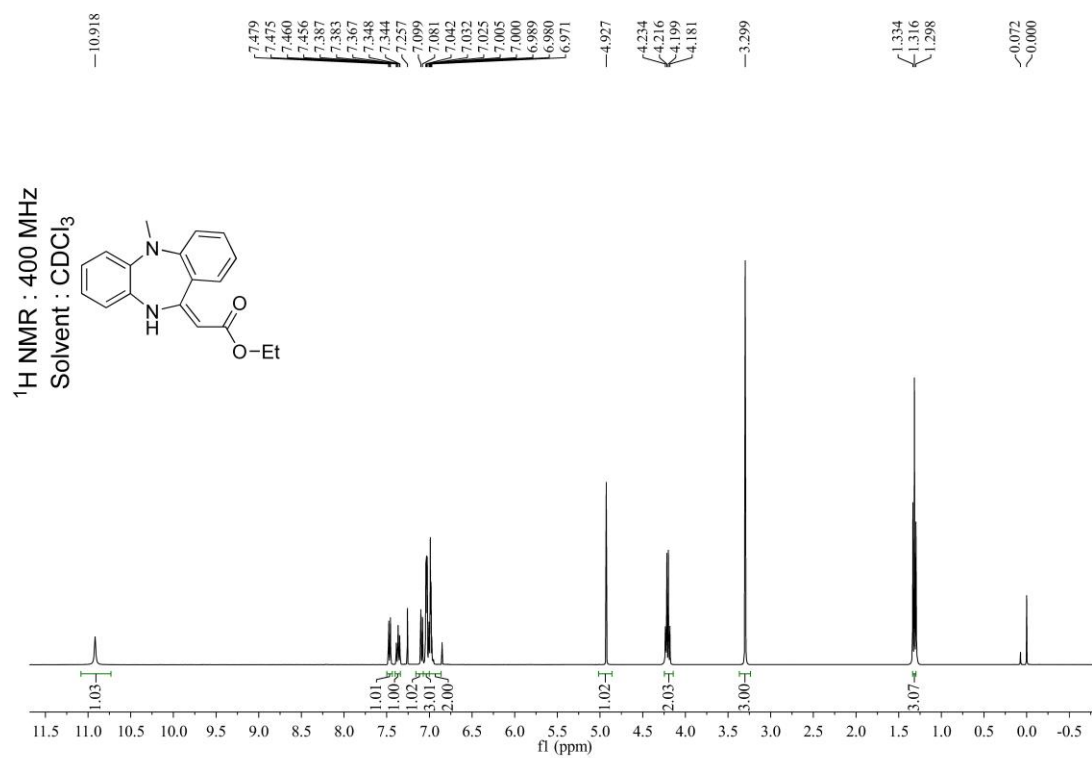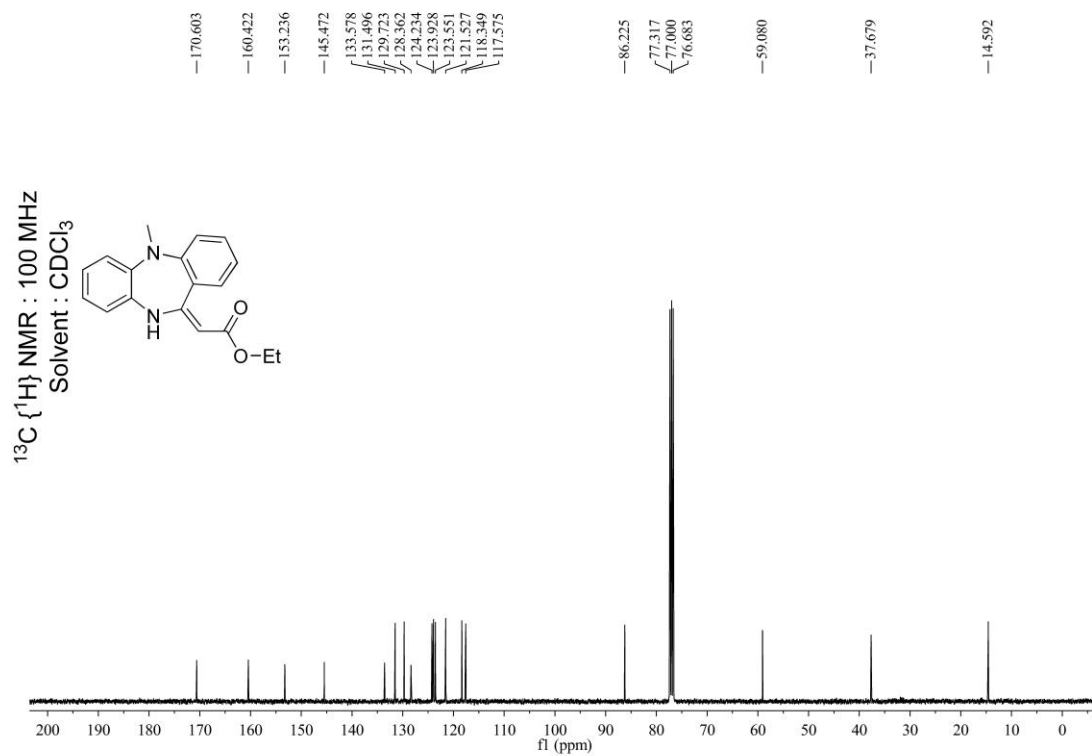

**(E)-1-(5-methyl-5,10-dihydro-11H-dibenzo[b,e][1,4]diazepin-11-ylidene)-3-phenylpropan-2-one(4a)**

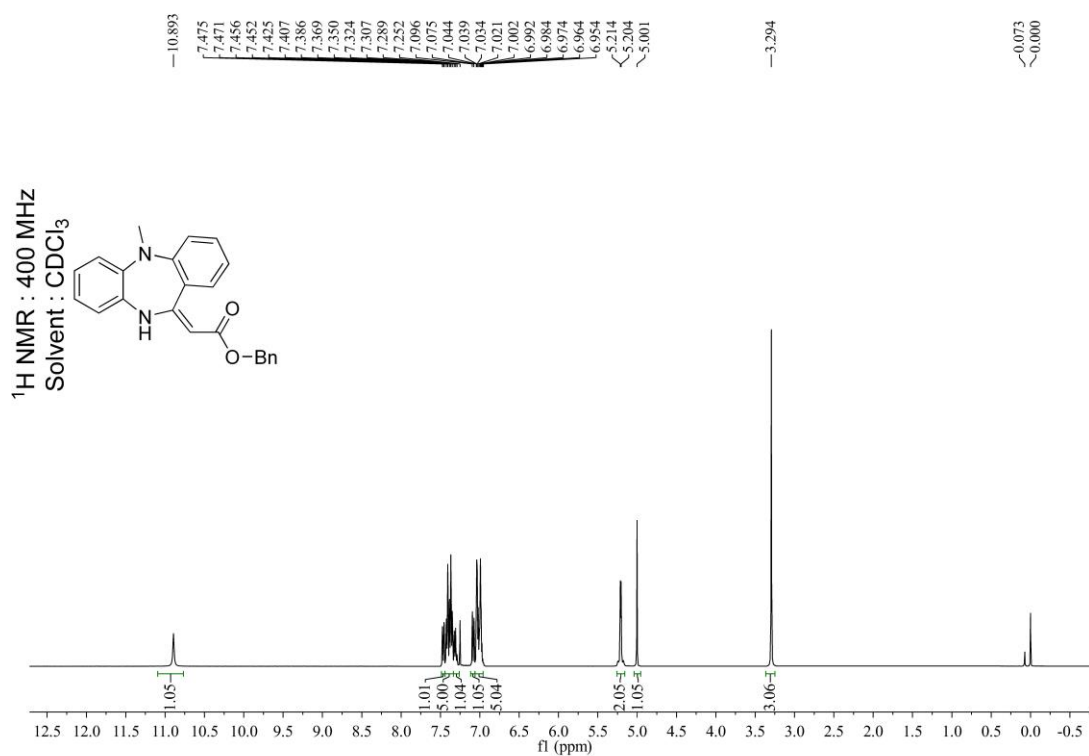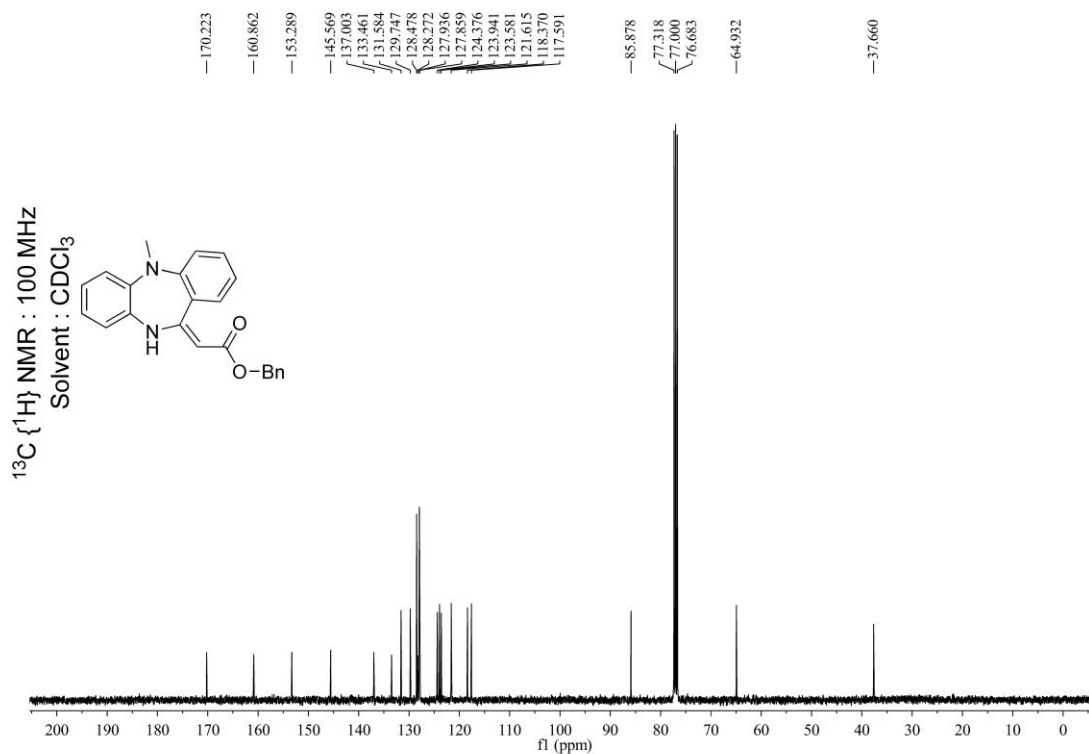

**(E)-2-(5-methyl-5,10-dihydro-11H-dibenzo[b,e][1,4]diazepin-11-ylidene)-1-phenylethan-1-one(4am)**

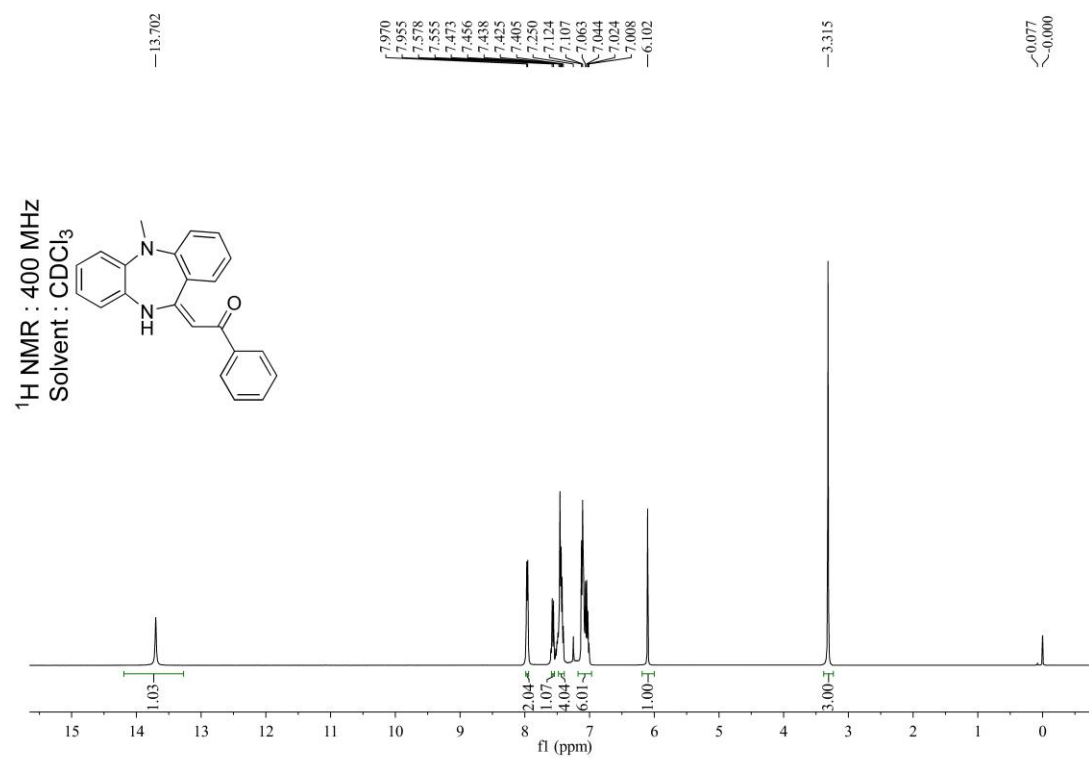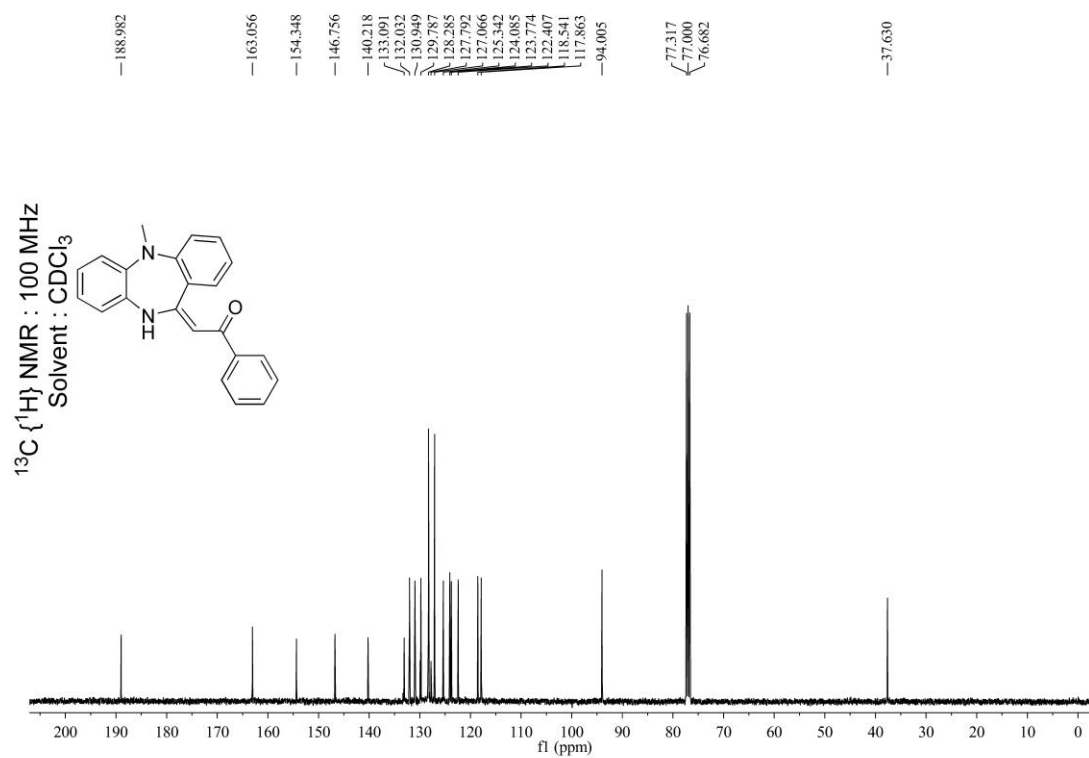

**(Z)-2-(5-methyl-5,10-dihydro-11H-dibenzo[b,e][1,4]diazepin-11-ylidene)-1-(p-tolyl)ethan-1-one(4an)**

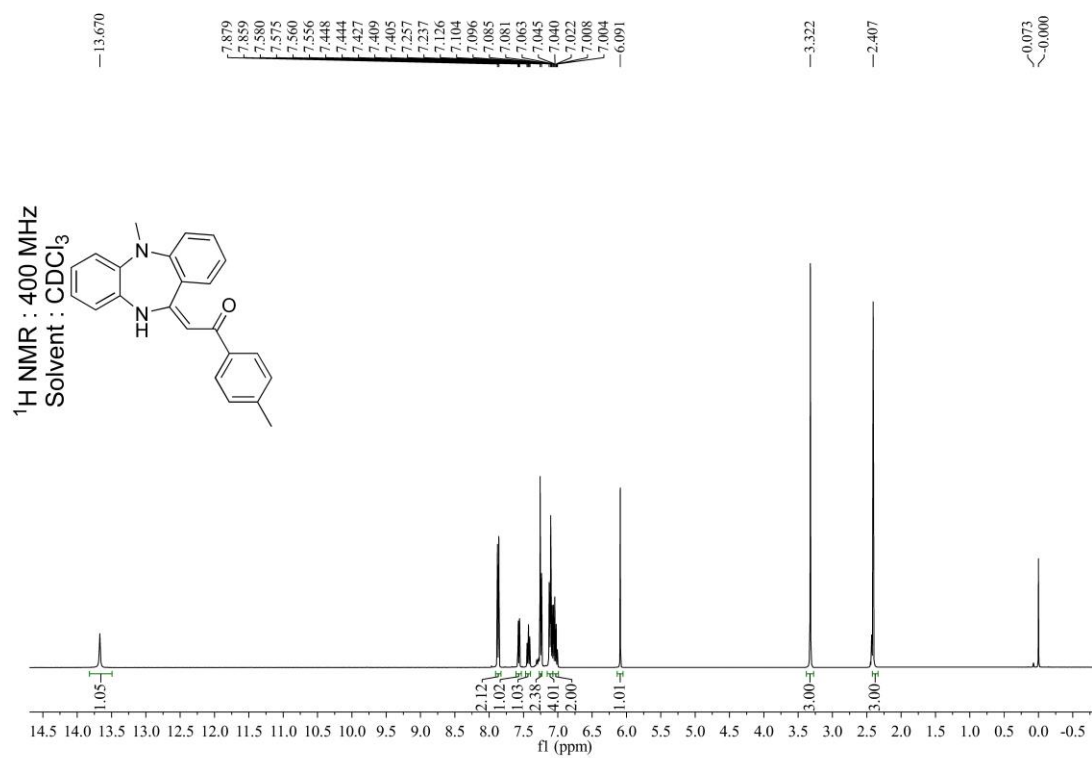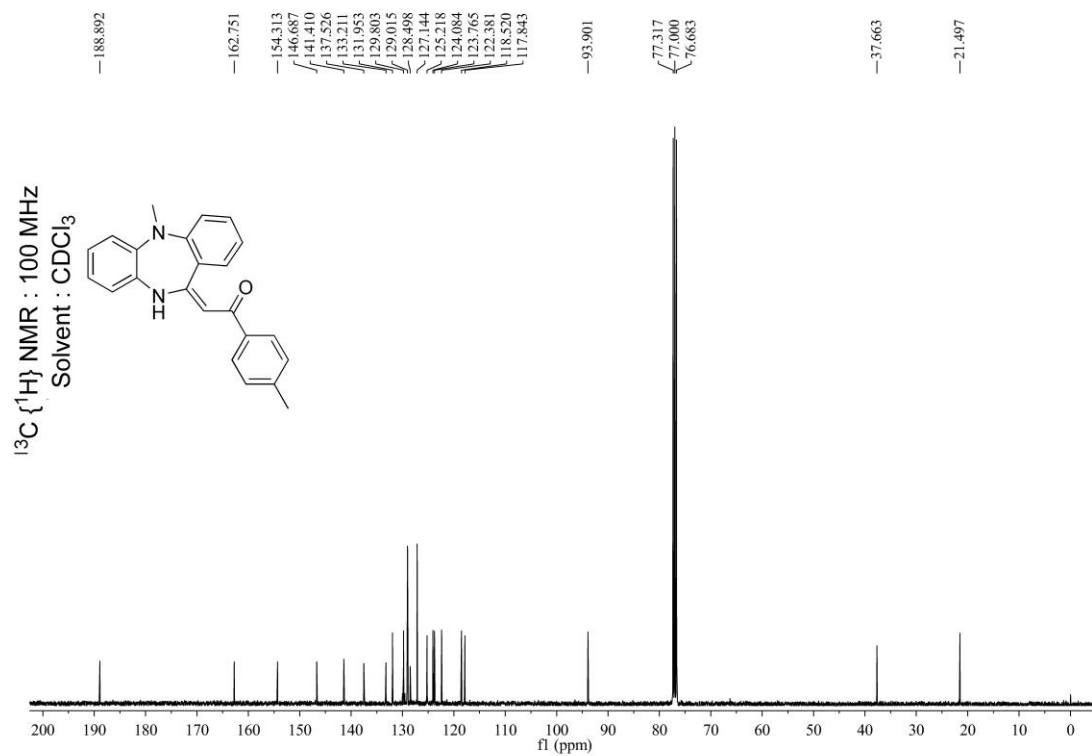

**(E)-1-(4-methoxyphenyl)-2-(5-methyl-5,10-dihydro-11H-dibenzo[b,e][1,4]diazepin-11-ylidene)ethan-1-one(4ao)**

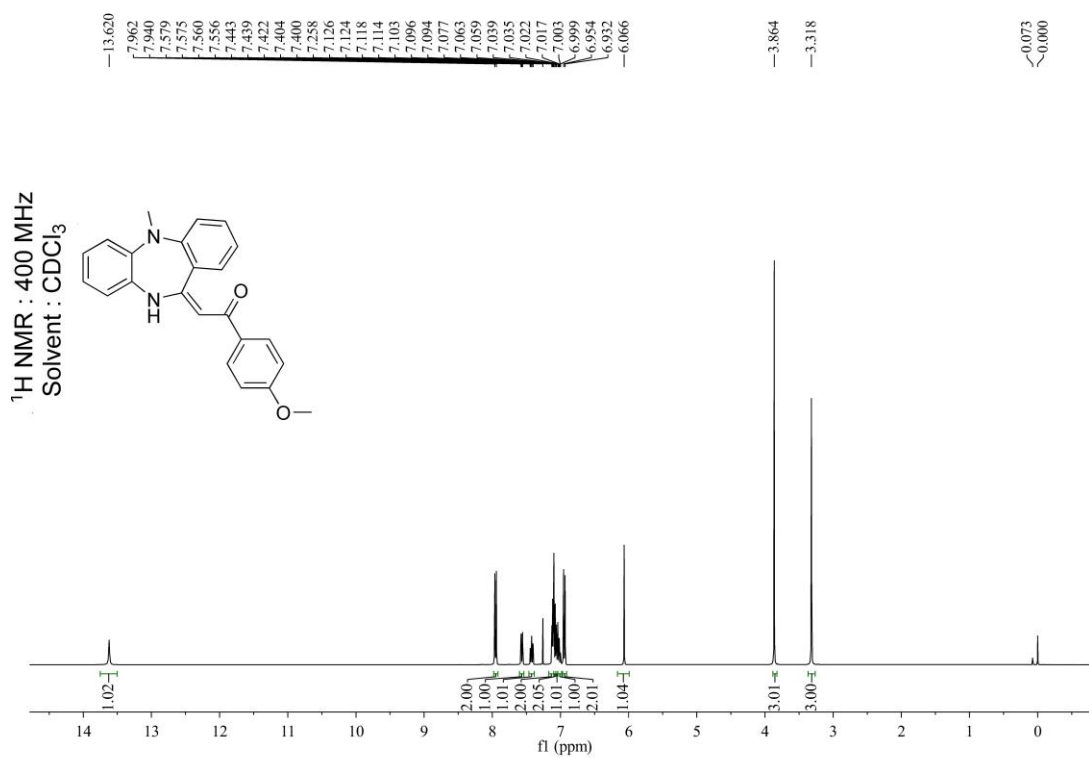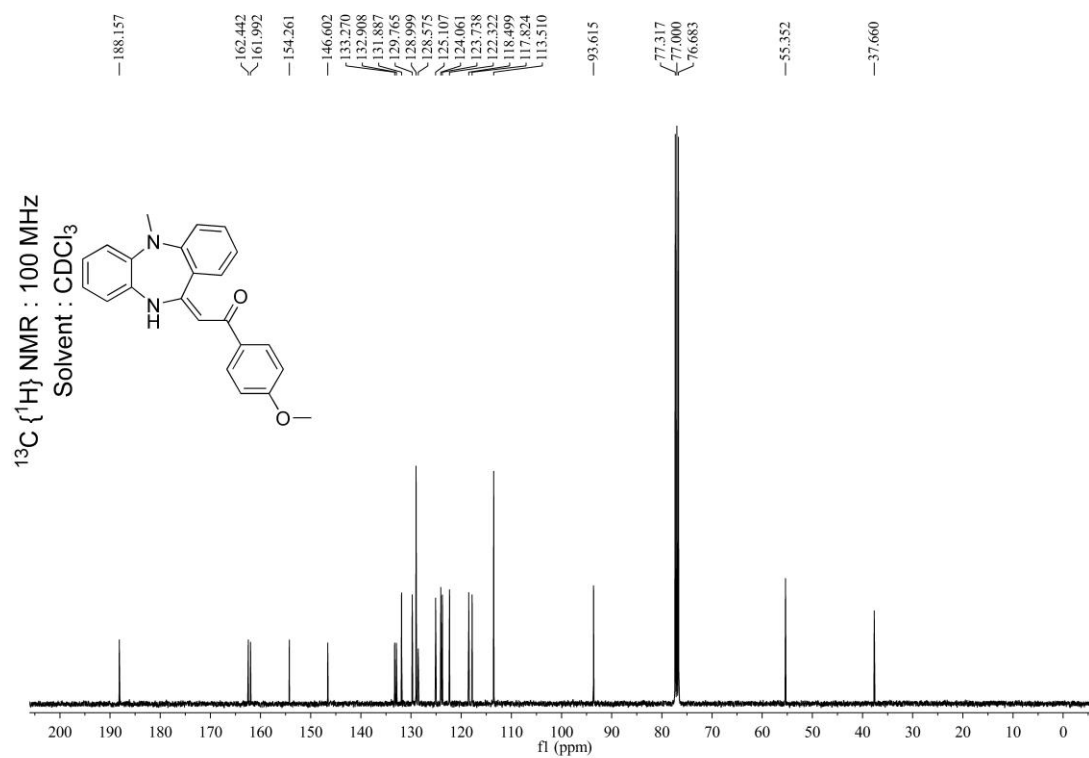

***tert*-Butyl 2-(3,5-di-*tert*-butyl-1-methyl-4-oxo-1H-indol-5-yl)-2-methylpropanoate (5)**

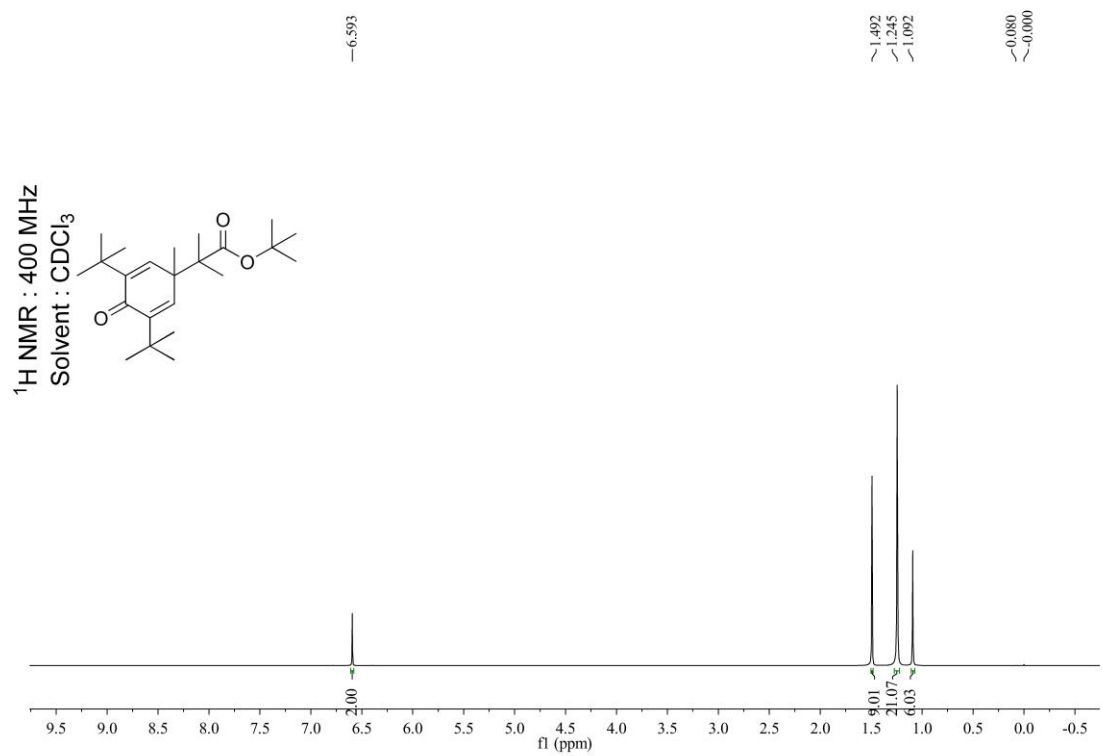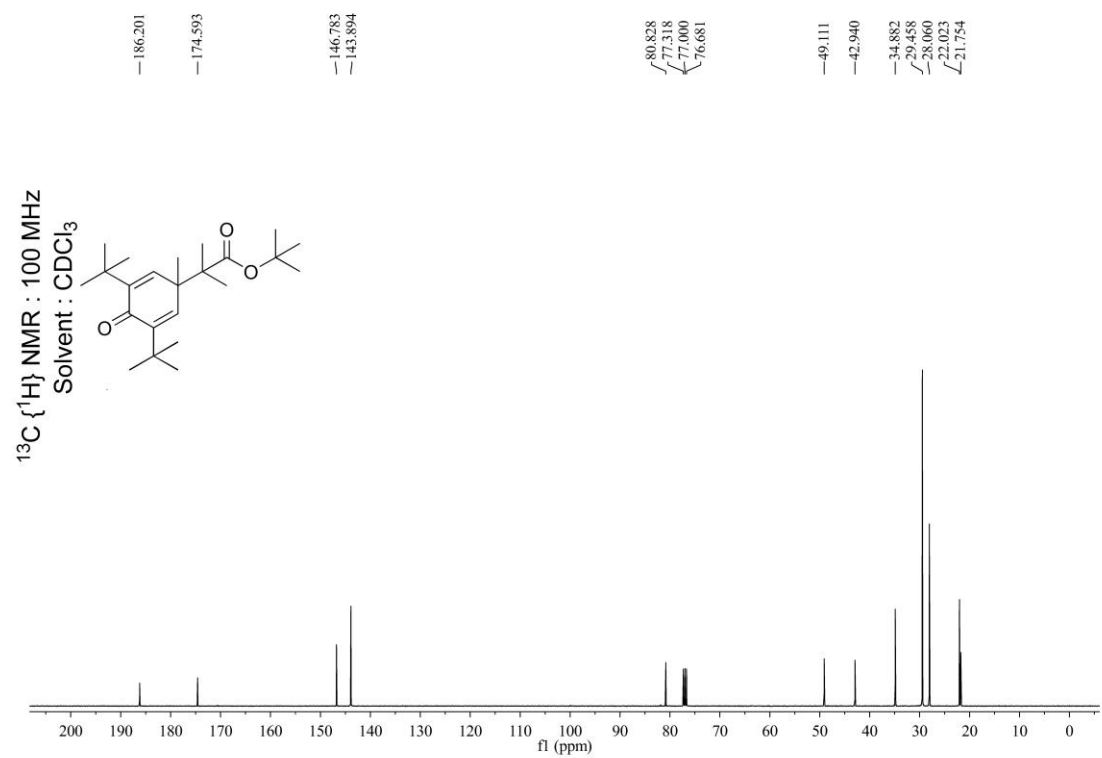

### 3,3-Dimethyl-5,5-diphenyldihydrofuran-2(3H)-one (6)

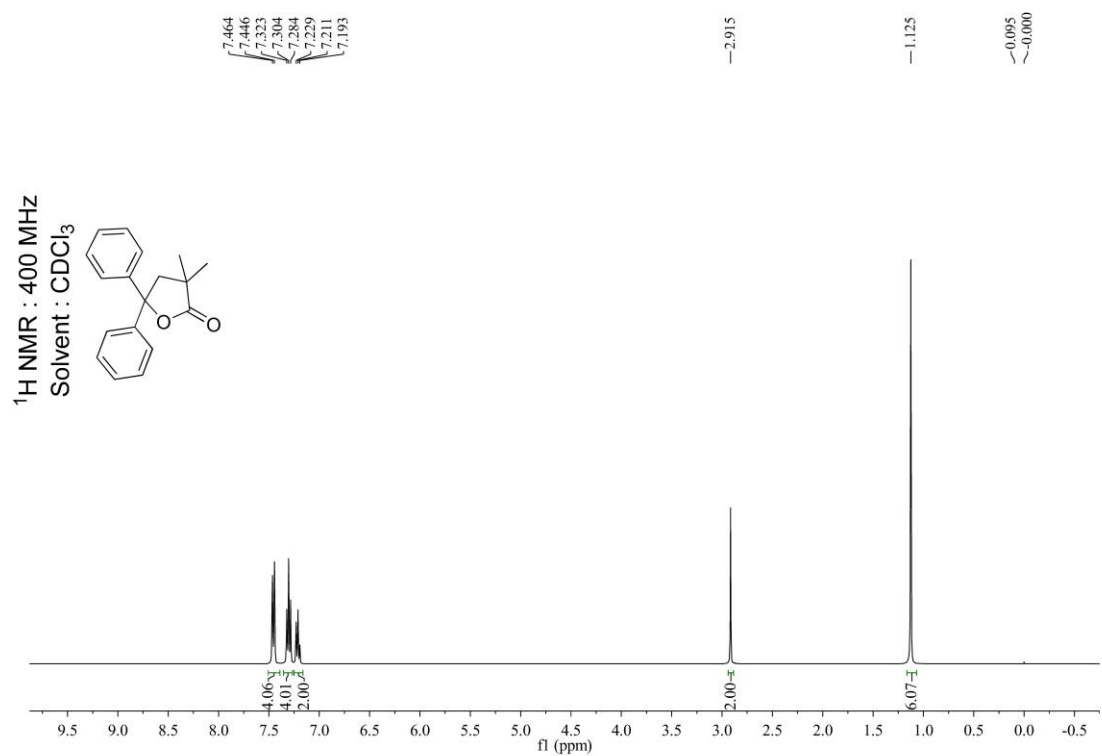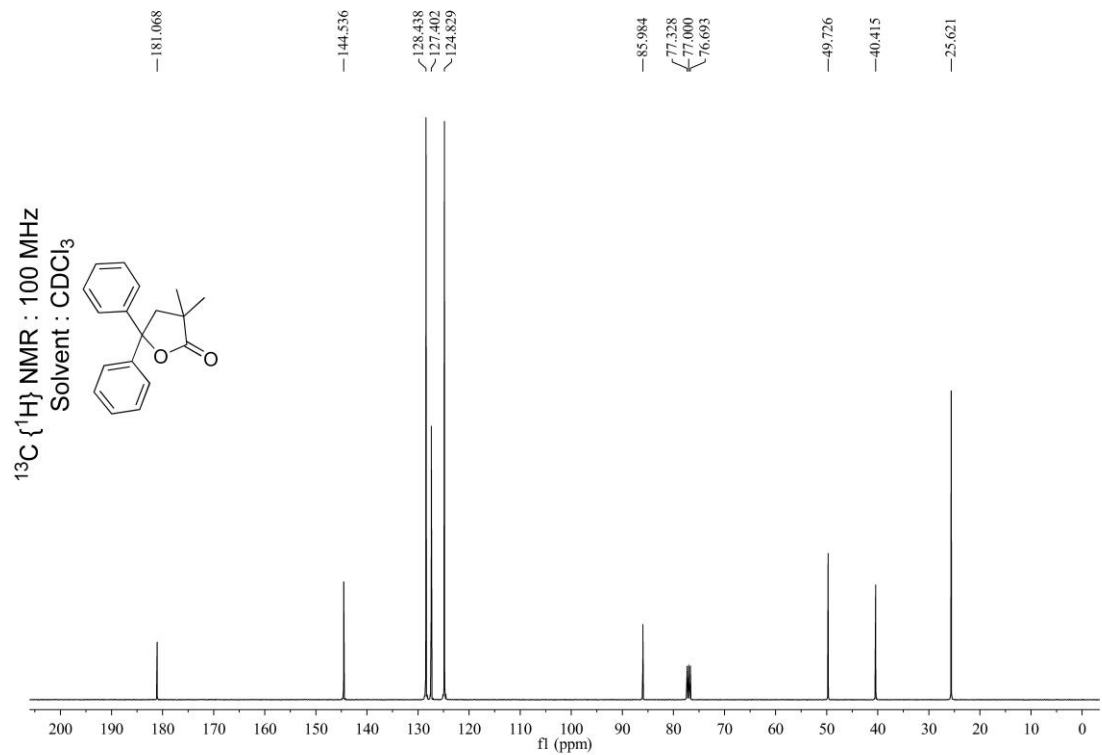

Supplement: d4ob01985g1.pdf [file d4ob01985g1.pdf]
